# Supplementary material
Source: Research Square preprint supplement (doi:10.21203/rs.3.rs-10403288/v1)
Supplement: Supplementary file 2 [file 4f5e122d5643cb1579ee247f.xlsx]

## Sheet: Sayfa1
stdid	Task	answer	Human	stdinput	expertrevision	AS_i1_p1	AS_i1_p2	AS_i2_p1	AS_i2_p2
A1	drive	1	6	Ali ve Hasan toplam kaç km araba sürmüştür.	Ali ve Hasan toplam kaç km araba Sürmüstür.	6	6	6	6
A1	drive	2	6	Hasan kaç km araba sürmüştür?	Hasan kaç km araba sürmüştür?	6	6	6	6
A1	drive	3	4	Mert, Hasan ve Ali'nin Sürdüğü kilometre miktarının aritmetik ortalamasını bulunuz	Mert, Hasan ve ali'nin Sürdüğü kilometre miktarının aritmetik ortalamasını bulunuz	6	6	6	6
A1	cake	1	2	Bir Pizza 12 eşit parçaya ayrılmıştır. Ayşe Pizza'nın 2/12'ini Fatma 6/12'ini Asiye ise 4/12'ini yemistir.	Bir Pizza 12 esit parcaya ayrılmıstır. Ayse Pizza'nın 2/12'ini Fatma 4/12'ini Asiye ise 2/12'ini yemistir.	2	2	2	2
A1	cake	2	6	Bir ekmeği 24 Parçaya kesmistirler. Semra ekmeğin 6/24 ini Elif ise 2/24 ini yeniştir. Geriye kaç Parca kaldığını bulunuz.	Bir ekmeği 24 Parçaya kesmistirler. Semra ekmeğin 4/24'ini Elif ise 2/24'ini yemiştir. Geriye kaç Parca kaldığını bulunuz.	6	6	6	6
A1	cake	3	6	Bir Pasta 48 Parçaya belinmüştür. Ve Leyla bu Pastanın 9/48 yemistir. Geriye kaç Parça kaldığını bulunuz.	Bir Pasta 48 Parcaya bölünmüştür. Ve leyla bu Pastanın 5/48 yemistir. Geriye kaç Parca kaldığını bulunuz.	6	6	6	6
A2	drive	1	0			0	0	0	0
A2	drive	2	0			0	0	0	0
A2	drive	3	0			0	0	0	0
A2	cake	1	4	Problem 1: Elifin ve mertin yediği kek miktarı iki ile genişlettiğimizde ve topladığımızda kaç olur?	Elifin ve mertin yediği kek miktarını iki ile genişlettiğimizde ve topladığımızda çıkan sayı kaçtır?	6	6	6	6
A2	cake	2	6	Problem 2: Elifin keki ile mertin yediği kek sayısını topladığımızda alkon sayı tonda tan olması için kaç eklemeliyiz (u ile genişletilmiş hale)?	Elifin keki ile mertin yediği kek sayısını topladığımızda çıkan sayı tamda tam olması için kaç eklemeliyiz (4 ile genişletilmiş halde)	4	4	6	6
A2	cake	3	4	Problem 3: Kübra mert ve Elifter birer kek olmuştur ment kendisinin king geri almıştır Sopra pay ve Paydayı yer değiştirmiştir sonra kaçtr	Kübra mert ve Eliften birer kek almıstır mert kendisininkini geri almıstır Sonra pay ve paydayı yer değiştirmistir sonuç kactır	4	4	4	4
A3	drive	1	6	Mert arabayı kaç km sürmüştür?	Mert arabayı kaç km sürmüştür?	6	6	6	6
A3	drive	2	6	Hasan arabayı kaç km sürmüştür?	Hasan arabayı kaç km sürmüştür?	6	6	6	6
A3	drive	3	3	Bu yolculuğun bitmesine 100 km kaldıysa yolculuk kaç km sürer?	Bu yolculuğun bitmesine 100 km kaldıysa yolculuk kaç km sürer?	6	6	6	6
A3	cake	1	6	Elif, Mert ve Kübranın yediği toplam kek miktarı ne kadardır?	Elif, Mert ve Kübranın yediği toplam kek miktarı ne kadardır?	6	6	6	6
A3	cake	2	6	Elif, Kübra'dan ne kadar fazla kek yemiştir?	Elif, kübradan ne kadar fazla kek yemiştir?	6	6	6	6
A3	cake	3	6	Mert ile Kübra'nın yediği kek miktarının toplamı kaçtır?	Mert ile kübranın yediği kek miktarının toplamı kaçtır?	6	6	6	6
A4	drive	1	6	Bu bilgiye göre arkadaşlar toplam kaç km araba sürmüştür?	Bu bilgiye göre arkadaşlar toplam kaç km araba sürmüştür?	6	6	6	6
A4	drive	2	6	Hasan ve Ali 4 katı daha araba sürselerdi kaç km araba sürmüş olurlardı?	Hasan ve Ali 4 katı daha araba sürselerdi kaç km araba sürmüş olurlardı?	6	6	6	6
A4	drive	3	5	Bütün çocuklan iki günde 6 katı araba sürdüklerinde sonuncu gün ne kadar araba sürmüş olabilirler?	Bütün çocuklar iki günde 6 katı araba sürdüklerinde sonuncu gün ne kadar araba sürmüş olabilirler?	5	4	4	4
A4	cake	1	3	Bu bilgiye göre sizce yedikleri dilimler adaletli ve eşit midir?	Bu bilgiye göre sizce yedikleri dilimler adaletli ve eşit midir?	3	3	3	3
A4	cake	2	4	Mert ve kübranın yediği dilimlerin toplamının iki katı kaç olurdu?	Mert ve kübranın yediği dilimlerin toplamının iki katı kaç olurdu?	6	6	6	6
A4	cake	3	6	Bütün çocukların yediği kek dilimleri toplanınca kek biter-mi bitmez mi?	Bütün çocukların yediği kek dilimleri toplanınca kek bitermi bitmez mi?	6	6	6	6
A5	drive	1	6	Hasan kaç km araba sürmüştür?	Hasan kaç km araba sürmüştür?	6	6	6	6
A5	drive	2	6	Hasan ve Ali'nin toplam ne kadar araba sürdüğünü bulunuz?	Hasan ve Ali'nin toplam ne kadar araba sürdüğü bulunuz?	6	6	6	6
A5	drive	3	6	Mert kaç km araba sürmüştür?	Mert kaç km araba sürmüştür?	6	6	6	6
A5	cake	1	6	Mert ve Kübra toplam kaç dilim kek yemiştir?	Mert ve Kübra toplam kaç dilim kek yemiştir?	6	6	6	6
A5	cake	2	6	Elif, Kübra'dan kaç dilim kek fazla yemiştir?	Elif, Kübra'dan kaç dilim kek fazla yemiştir?	6	6	6	6
A5	cake	3	6	Mert ve Kübra'nın yediği kekin toplamı Elif'e eşit mi? Neden?	Mert ve Kübra'nın yediği kekin toplamı Elif'e eşit mi? Neden?	6	6	6	6
A6	drive	1	6	Hasan kaç km araba sürmüştür?	Hasan kaç km araba sürmüştür?	6	6	6	6
A6	drive	2	6	Mert ve Hasan'ın sürdüğü miktar Ali'nin sürdüğü miktardan kaç fazladır?	Mert ve Hasan'ın sürdüğü miktar Ali'nin sürdüğü miktar kaç fazladır?	6	6	6	6
A6	drive	3	6	Mert, Hasan'dan 240 km az araba sürdüğüne göre Mert ne kadar araba sürmüştür?	Mert, Hasan'dan 240 km az araba sürdüğüne göre Mert ne kadar araba sürmüştür?	6	6	6	6
A6	cake	1	6	Elif, Mert'den kaç dilim fazla yemiştir? 4/8 - 2/8 = 2/8 dilim fazla yemiştir.	Elif, Mert'den kaç dilim fazla yemiştir?	6	6	6	6
A6	cake	2	6	Mert ve Kübra'nın yediği dilimler toplam dilimleme kadardım? 2/8 + 2/8 = 4/8	Mert ve Kübra'nın yediği toplam dilimler ne kadardır?	6	6	6	6
A6	cake	3	6	Elif ve Mert toplam kaç dilim yemişlerdir? 4/8 + 2/8 = 6/8 toplan dilim yemisten	Elif ve Mert toplam kaç dilim yemişlerdir?	6	6	6	6
A7	drive	1	6	Bu bilgilere göre hasan ve Mert kaç km sürmüştür	Bu bilgilere göre hasan ve Mert kaç km sürmüştür?	6	6	6	6
A7	drive	2	6	Bütün arkadaşlar sürdülm ne kadardır?	Bütün arkadaşlar sürdü km ne kadardır?	6	6	6	6
A7	drive	3	6	Hasanla, ali km sürmüştür?	Hasanla, ali km sürmüştür?	6	6	6	6
A7	cake	1	6	Bu problemde Mert ve Elif yedikleri miktar kaçtır?	Bu problemde Mert ve Elif yedikleri miktar kaçtır?	6	6	6	6
A7	cake	2	6	Elif ve Kübra'nın yedikleri miktar kaçtır?	Elif ve Kübrannın yedikleri miktar kaçtır?	6	6	6	6
A7	cake	3	4	3 arkadaş toplamda kaçta birini yemiştir?	3 arkadaş toplamda kaçta birini yemiştir?	6	6	6	6
A8	drive	1	6	Hason koa km oraba Sürməstó bolunuz?	Hasan kaç km araba sürmüstü bulunuz?	6	6	6	6
A8	drive	2	6	Mert, Aliden koa km doha osobo Sürmüştür bulunuz?	Mert, Aliden kaç km daha araba sürmüstür bulunuz?	6	6	6	6
A8	drive	3	6	Hoson olidon kot doho fozle ordbog, Sürdoyse Hoson koc km ore boy, sür mustor bulunuz?	Hasan aliden 9 kat daha fazla arabayı sürdüyse Hasan kaç km arabayı sürmüstür bulunuz?	6	6	6	6
A8	cake	1	6	Bir kek 8 eşit parçaya bölünmüştür. Bu kekin 4/8'ini Elif, 2/8'ini Mert ve 1/8'ini Kübra yemiştir. Buna göre toplam kaç dilim pasta yenilmiştir? Bulunuz.	Bir kek 8 eşit parçaya bölünmüştür bu kekin 4/8'ini Elif, 2/8'ini Mert ve 2/8'ini kübra yemiştir buna göre toplam kaç dilim pasta yenilmiştir bulunuz	6	6	6	6
A8	cake	2	6	Elif Kübra'dan ne kadar fazla kek yemiştir bulunuz?	Elif Kübra'dan ne kadar fazla kek yemiştir bulunuz?	6	6	6	6
A8	cake	3	6	Elif Mert'ten ne kadar fazla yemiştir Bulunuz?	Elif Mert'ten ne kadar fazla yemiştir Bulunuz?	6	6	6	6
C1	drive	1	6	En çok kilometreyi kim sürmüştür?	En çok kilometreyi kim sürmüştür?	6	6	6	6
C1	drive	2	4	Mert hasanın kaç kartı fazlasını sürmüştür.	Mert hasan'ın kaç katı fazlasını sürmüştür.	4	4	4	4
C1	drive	3	6	Kilometre Sayılarını büyükten küçüğe doğru Siralayınız?	Kilometre sayılarını büyükten küçüğe doğru siralayınız?	6	6	6	6
C1	cake	1	4	8 dilimlik kek 3 arkadaşa paylaşılmıştır. Bu kesir sayılarını birler basamağına yuvarlandığında hangi sonuç çıkar bulunuz!	8 dilimlik kek 3 arkadaşa paylaşılmıştır. Bu kesir sayılarını birler basamağına yuvarlandığında hangi sonuç çıkar bulunuz!	4	6	4	6
C1	cake	2	6	Elif, Kübra'nın yediği kekin kaç katını yemiştir?	Elif, Kübra'nın yediği kekin kaç katını yemiştir?	6	6	6	6
C1	cake	3	4	Elif'in 4/8 kesrini 10 ile genişletiniz.	Elif'in 4/8 kesrini 10 ile genişletiniz.	4	4	4	4
C2	drive	1	6	Buna göre bu 3 arkadaşın sürdüğü km sayısı kaçtır?	Buna göre bu 3 arkadaşın sürdüğü km sayısı kaçtır?	6	6	6	6
C2	drive	2	6	Bu verilere göre Mert kaç km araba sürmüştür?	Bu verilere göre Mert kaç km araba sürmüştür?	6	6	6	6
C2	drive	3	4	Bu km sayıları üç kişiye eşit olarak bölünürse her birine ne kadar km sayısı düşer?	Bu km sayıları üç kişiye eşit olarak bölünürse her birine ne kadar km sayısı düşer?	6	6	6	6
C2	cake	1	6	Elif Kübra'nın yediği kek miktarının baş katını yemiştir.	Elif Kübra'nın yediği kek miktarının kaç katını yemiştir.	6	6	6	6
C2	cake	2	6	Mert ve Kübra'nın yediği kek miktarı Elif'in yediği kek miktarından ne kadar fazladır.	Mert ve Kübra'nın yediği kek miktarı Elif'in yediği kek miktarından ne kadar fazladır.	6	6	6	6
C2	cake	3	6	Kek 8 dilim'dir., ve kekin tümü 12 TL'dir. bir dilim ne kadardı?	Kek 8 dilim'dir ve kekin tümü 12 TL'dir. bir dilim ne kadardır?	6	6	6	6
C3	drive	1	6	Hasan ve Ali'nin toplam gittiği yol kaç km'dir?	Hasan ve Ali'nin toplam gittiği yol kaç km'dir?	6	6	6	6
C3	drive	2	5	Hasan Ali'den kaç km daha hızlı gitmiştir?	Hasan Ali den kaç km daha hızlı gitmiştir.	5	5	4	4
C3	drive	3	6	Buna göre Hasan kaç km yol gitmiştir?	Buna göre Hasan kaç km yol gitmiştir?	6	6	6	6
C3	cake	1	6	Buna göre Elif ve Mert kekin başta kaçını yemiştir,	Buna göre Elif ve Mert kekin kaçta kaçını yemiştir.	6	6	6	6
C3	cake	2	6	Bu kek 10 parçaya bölünseydi her birine ne kadar kek düşerdi.	Bu kek 10 parçaya bölünseydi her birine nekadar kek düşerdi.	5	5	5	5
C3	cake	3	6	Elif Mertin kaç katı Kek yemiştir.	Elif Mertin kaç katı Kek yemiştir.	6	6	6	6
C4	drive	1	6	Buna göre Hasan kaç km araba sürmüştür	Buna göre Hasan kaç km araba sürmüştür	6	6	6	6
C4	drive	2	6	Buna göre toplam bu üç kişi ne kadar araba sürmüştür	Buna göre toplam bu üç kişi ne kadar araba sürmüştür	6	6	6	6
C4	drive	3	4	Buna göre bu üç kişinin sürdükleri araba kilonetresinin aritmetik ortalaması kaçtır?	Buna göre bu üç kişinin sürdükleri araba kilometresinin aritmetik ortalaması kaçtır?	6	6	6	6
C4	cake	1	6	Buna göre Elifin keki, Kübra ile Mertin keklerin toplamiyla karşılaştırıniz.	Buna göre Elifin keki, Kübra ile Mertin keklerin toplamiyla karşılaştırıniz.	6	6	6	6
C4	cake	2	6	Bu kek 16 Lira olduğuna göre Mert bu kekin kaç Lira kısmını yemiştir?	Bu kek 16 Lira olduğuna göre Mert bu kekin kaç tl'lik kısmını yemiştir?	6	6	6	6
C4	cake	3	4	Buna göre Elifin kekini ondalık gösterimlerle ifade ediniz.	Buna göre Elifin kekini ondalık gösterimlerle ifade ediniz.	6	6	6	6
F1	drive	1	6	Verilen bilgilere göre toplam kaa km yol gidilmiştir?	Verilen bilgilere göre toplam kaç km yol gidilmiştir?	6	6	6	6
F1	drive	2	6	Bu bilgilere göre Mert'in sürdüğü yol Ali'nin sürdüğü yoldan kaa km. fazladır?	Bu bilgilere göre Mert'in sürdüğü yol Ali'nin sürdüğü yoldan kaç km fazladır?	6	6	6	6
F1	drive	3	6	Bu bilgilere göre Hasan ve Ali'nin sürdüğü km toplamından Mert'in sürdüğü toplam km çıkarılırsa soru ne olur?	Bu bilgilere göre Hasan ve Ali'nin sürdüğü km toplamından Mert'in sürdüğü toplam km çıkarılırsa sonuç kaç olur?	6	6	6	6
F1	cake	1	6	Bu bilgilere göre Mert ve Elif'in yediği toplam kek sayısının toplamı Kübra'nın yediği kekten kaç fazladır?	Bu bilgilere göre Mert ve Elif'in yediği toplam kek sayısının toplamı Kübra'nın yediği kekten kaç fazladır?	6	6	6	6
F1	cake	2	6	Bu bilgilere göre kişiler, yedikleri dilim sayısı bakımından küçükten büyüğe sıralandığında sonuncu kişi kim olur?	Bu bilgilere göre kişiler, yedikleri dilim sayısı bakımından küçükten büyüğe sıralandığında sonuncu kişi kim olur?	6	6	6	6
F1	cake	3	6	Bu bilgilere göre Elif'in bir tam kek yemiş olması için kaç kek daha yemesi gerekir?	Bu bilgilere göre Elif'in bir tam kek yemiş olması için kaç kek daha yemesi gerekir?	6	6	6	6
F10	drive	1	6	Buno gare göre toplom yolun, Hoson koçt o koçını orobo sormustur?	Buno gore gore toplam yolun, Hasan kacta kacını araba surmuştur?	6	6	6	6
F10	drive	2	5	Yol bittikten sonro Mert ve Hason orobayı alıp bir yolo doho cıkıgarlor. Ve bu yolun 3 Hosan, 3 Mert kullanmıştır. Buna gore Hoson ve Mert toplom yolculugun kosto kaçını orobo surmuşlerdir?	Yol bittikten sonra Mert ve Hasan arabayı alıp bir yola daha çıkıyorlar. Ve bu yolun 3/6 Hasan, 3/6 Mert kullanmıştır. Buna göre Hasan ve Mert toplam yolculuğun kaçta kaçını araba surmuşlerdir?	5	5	5	5
F10	drive	3	6	Buno cono Hason, Mert, Ali ilk yokuluklarında keç km yol gitmişlerdir?	Buna gore Hasan, Mert, Ali ilk yolculuklarında kaç km yol gitmişlerdir?	6	6	5	6
F10	cake	1	6	Buna göre Elif ile Mert'in yediği toplam dilim sayısı, pastanın dilim sayısının kocto koçıdır?	Buna göre Elif ile Mert'in yediği toplam dilim sayısı, pastanın dilim sayısının kaçta kaçıdır?	6	6	6	6
F10	cake	2	6	Bundan sonro Ekin ise 10 eşit porcoyo ayrılmış bır pi220 getirmis bu pizzodando Elif 2, Mert 1 , Kübra 2 Ekin ise 2 'sini yemiştir. Buna göre Toplom (Pizzo ve Posto olmok üzere) bir kişiler kos dilim yemiştir?	Bundan sonra Ekin ise 10 eşit parcaya ayrılmış bir pizza getirmis bu pizzadanda Elif 2/10, Mert 1/10, Kübra 3/10 Ekin ise 2/10 'sini yemiştir. Buna göre Toplam (Pizza ve Pasta olmak üzere) bir kisiler kaç dilim yemiştir?	6	6	6	6
F10	cake	3	5	Buno göre Elkin ve Kubro toplom posto ve piz20 dilimlerinin kocto kaçını yemiştir?	Buna göre Ekin ve Kübra toplam pasta ve pizza dilimlerinin kacta kaçını yemiştir?	4	4	5	5
F11	drive	1	6	Braiden dönerken Mert, Hasan'dan 240 km az araba sürmüştür. Hasan Ali'nin sürdüğü miktarın 9 katı kadar araba sürmüştür. Ali 80 km, araba sürdü. Buna göre Mert ne kadar araç sürmüştür.	Geziden dönerken Mert, Hasan'dan 240 km az araba sürmüştür. Hasan Ali'nin sürdüğü miktarın 9 katı kadar araba sürmüştür. Ali 80 km araba sürdü. Buna göre Mert ne kadar araç sürmüştür.	6	6	6	6
F11	drive	2	6	Yukarıdaki bilgiye göre dönüş yolu kaç kmdir.	Yukarıdaki bilgiye göre dönüş yolu kaç kmdir.	6	6	6	6
F11	drive	3	6	Yukarıdaki bilgiye göre Hasan ve Ali'nin sürdüğü araba Miktarı Mert'ten ne kadar fazladır.	Yukarıdaki bilgiye göre Hasan ve Ali'nin sürdüğü araba miktarı Mert'den ne kadar fazladır.	6	6	6	6
F11	cake	1	5	Bir kek 8 eşit parçaya ayrılmıştır Elif kekin 4/8'ini, Mert 2/8'ünü yemiştir buna göre Kübra kekin ne kadarını gumiştir.	Bir kek 8 eşit parçaya ayrılmıştır Elif kekin 4/8'ini, Mert 1/4'ünü yemiştir buna göre Kübra kekin ne kadarını yemiştir.	5	5	5	6
F11	cake	2	5	Bir kek 8 esit parçaya ayrılmıştır Elif kekin 2/8'ini, Mert 1/8'ini yemiştir. Kübra'nın yediği kısım kaldığına göre Kübra tam olarak kaç parça kek yemiştir.	Bir kek 8 esit parçaya ayrılmıştır Elif kekin 1/2'sini, Mert kekin 2/4'ünü yemiştir. Kübra tam olarak kaç parça kek yemiştir.	6	6	5	5
F11	cake	3	6	Yukarıdaki bilgiye göre hepsinin yediği miktarın toplam. Kekin Yüzde kaçıdır.	Yukarıdaki bilgiye göre hepsinin yediği miktarın toplamı kekin yüzde kaçıdır.	6	6	6	6
F12	drive	1	5	Mert ile Hasan sürdüğünde ne kader Yol daha kalmıştır?	Buna göre Mert ile Hasan sürdüğünde ne kader yol daha kalmıştır?	5	5	5	5
F12	drive	2	4	Ali ila Mert'in gittiği yolun 1/2'si kaçtır?	Ali ile Mert'in gittiği yolun 1/2'si kaçtır?	6	6	6	6
F12	drive	3	4	Hasan ile Ali gittiği yolun 1/4'ü kaçtır?	Hasan ile Ali gittiği yolun 1/4'ü kaçtır?	6	6	6	6
F12	cake	1	6	Elif kekin 4/8 ini, Mert'se 2/8 ini yediyse ne kadar kek kalmıştır?	Buna göre Elif kekin 4/8 ini, Mert'se 2/8 ini yediyse ne kadar kek kalmıştır?	6	6	6	6
F12	cake	2	4	Kübra kekin 0,250'sini Elif 0,480'sini yediyse ne kadar kek kalır?	Kübra kekin 0,250'sini Elif 0,480'sini yediyse ne kadar kek kalır?	6	6	6	6
F12	cake	3	6	8 eşit parçaya ayrılmış kekin Elif 4/8 ini yedikten sonra kalan kekinde 1/8 ini yerse ne kadar kek kalır?	8 eşit parçaya ayrılmış kekin Elif 4/8'ini yedikten sonra kalan kekinde 1/8'ini yerse ne kadar kek kalır?	6	6	6	6
F13	drive	1	4	Mertlin surdugo kminin Alilnin sürduğü kmlye oranının Hasan'ın sürdüğü km'ye oranı kaçtır	Mert'in sürdüğü km'nin Ali'nin sürduğü km'ye oranının Hasan'ın sürdüğü km'ye oranı kaçtır	6	6	6	6
F13	drive	2	6	Mert kaç km sürmüştür	Mert kaç km sürmüştür	6	6	6	6
F13	drive	3	5	Ali 120 km syrmüş olsaydı Mert in sürduğu kui'nin Alinin sürdüğü km'ye orenı kaçtır.	Ali 120 km sürmüş olsaydı Mert'in sürdüğü km'nin Alinin sürdüğü km'ye oranı kaçtır.	6	6	6	6
F13	cake	1	6	Elif'in kek'den yemediği kısımın Mert'in yediği kısma oranı kaçtır?	Elif'in kek'den yemediği kısımın Mert'in yediği kısma oranı kaçtır	6	6	6	6
F13	cake	2	4	Elif'in yemediği kısmın Kübra'nın yediği kısma oranının Mert'in yemediği kısma oranı kaçtır?	Elif'in yemediği kısmın Kübranın yediği kısma oranının Mert'in yemediği kısma oranı kaçtır	6	6	6	6
F13	cake	3	6	Mert ve Kübra'nın yemediği kısmın toplamının kekin parça sayısına oranı kaçtır?	Mert ve Kübranın yemediği kısmın toplamının kekin parça sayısına oranı kaçtır	6	6	6	6
F14	drive	1	6	Buna göre, Hasan'ın toplam km'sinin, araba toplam km olanı nedir?!	Buna göre, Hasan'ın toplam km'sinin, grubun toplam km oranı nedir?	6	6	6	6
F14	drive	2	6	Buna göre, Ali'nin ve Mert'in toplam mesafesi ile Hasan'ın mesafesinin farkı kaçtır?	Buna göre, Ali'nin ve Mert'in toplam mesafesi ile Hasan'ın mesafesinin farkı kaçtır?	6	6	6	6
F14	drive	3	4	ve toplam yol 2500km olduğuna göre toplam kaç km kadalıdır?	ve toplam yol 2500km olduğuna göre toplam kaç km kalmıştır?	6	6	6	6
F14	cake	1	6	Problem 1: Elif Mert ve Kübra poralarını birleştirerek kek almıştır ve bu keki 8'e bölmüşlerdir. Elif kekin yarısını, Mert 1/8 ini, Kübra'da 2/8'ini yemiştir. Buna göre, eğer kek 16'ya bölünseydi, hepsi (tek) olarak kaç dilim kek yemiştir?	Elif, Mert ve Kübra paralarını birleştirerek kek almıştır ve bu keki 8'e bölmüşlerdir. Elif kekin yarısını, Mert 2/8 ini, Kübra'da 2/8'ini yemiştir. Buna göre, eğer kek 16'ya bölünseydi, hepsi tek olarak kaç dilim kek yemiştir?	6	6	6	6
F14	cake	2	6	Problem 2: Elif kendisi ve arkadaşları için bir kek yapmıştır ve keki 8'e bölmüştür. Elif 4/8, Mert 1/8 & Kübra ise 2/8 'ini yemiştir. Bu kekin toplam fiyatı 40₺ olduğu göre, hepsinin yediği dilimlerin toplam fiyatı kaçtır?	Elif, kendisi ve arkadaşları için bir kek yapmıştır ve keki 8'e bölmüştür. Elif 4/8'i, Mert 2/8'i, Kübra ise 2/8 'ini yemiştir. Bu kekin toplam fiyatı 40 TL olduğuna göre, hepsinin yediği dilimlerin toplam fiyatı kaçtır?	6	6	6	6
F14	cake	3	6	Problem 3: Elif Mert ve Kübra beraber paralarını birleştirerek bir 8 dilimlik kek almıştır. Elif kekin 4/8'ini, Mert 1/8'ini, Kübra'da 2/8'ini yemiştir. Hepsi kendi dilimlerinin kendi parası ile ödemiştir. Elif dilimlerine 16 TL ödediğine göre, hepsi dilimlerine toplam kaç TL ödemiştir?	Elif, Mert ve Kübra beraber paralarını birleştirerek bir 8 dilimlik kek almıştır. Elif kekin 4/8'ini, Mert 2/8'ini, Kübra'da 2/8'ini yemiştir. Hepsi kendi dilimlerini kendi parası ile ödemiştir. Elif dilimlerine 16 TL ödediğine göre, hepsi dilimlerine toplam kaç TL ödemiştir?	6	6	6	6
F15	drive	1	6	Buna göre Hasan arabayı kaç km sürmüştür?	Buna göre Hasan arabayı kaç km sürmüştür?	6	6	6	6
F15	drive	2	6	Ali ile Hasan'ın sürdüğü km Mert'den kaç fazladır?	Ali ile Hasan'ın sürdüğü km Mert'den kaç fazladır?	6	6	6	6
F15	drive	3	4	Günün hızlarının toplamı ile Hasan'ın hızının toplamından kaç fazladır.	Üçünün hızlarının toplamı ile Hasanın hızının toplamından kaç fazladır.	4	4	4	1
F15	cake	1	4	Elif iki dilim Kübra ise bir dilim daha yeseydi Haç dilim Dalırd?	Elif iki dilim Kübra ise bir dilim daha yeseydi kaç dilim kalırdı?	4	4	4	4
F15	cake	2	4	Eğer br ababışlar. daha olsaydı 8 dilim ketten herbes koç tare yerdi?	Eğer bir arkadaşları daha olsaydı 8 dilim kekten herkes kaç tane yerdi?	5	5	5	5
F15	cake	3	6	Elif ve Kübra'nın yediği kek dikimlerinin toplamı Meetten Lag fazladır?	Elif ve kübra'nın yediği kek dilimlerinin toplamı Mertten kaç fazladır?	6	6	6	6
F16	drive	1	6	Hasan, Ali'nin sürdüğü miktarın 9 katını kadar sürmüştür. Ali 80km araba sürdüğüne göre Hasan ne kadar sürmüştür?	Hasan, Ali'nin sürdüğü miktarın 9 katını kadar sürmüştür. Ali 8km araba sürdüğüne göre Hasan ne kadar sürmüştür.	6	6	6	6
F16	drive	2	6	Mert, Hasan'dan 240 km az sürmüştür. Hasan ise Ali'nin sürdüğünün 9 katını sürmüştür. Ali 80km sürdüğüne göre, 3'ünün toplam sürdüğü km ne kadardır?	Mert, Hasandan 240 km az sürmüştür. Hasan ise Alinin sürdüğünün 9 katını sürmüştür. Ali 80 km sürdüğüne göre 3 nün toplam sürdüğü km ne kadardır?	6	6	6	6
F16	drive	3	4	Hasan 810 km sürmüştür. Ali ise 80km sürmüştür. Hasan'ın Ali'ye oranı kaçtır?	Hasan 810 km sürmüştür. Ali ise 80 km sürmüştür. Hasanın Ali ye oranı kaçtır.	6	6	6	6
F16	cake	1	5	Bir kek 8 eşit parçaya ayrılmıştır Elif 4/8 ini Mert ise 2/8 ini yemiştir. Buna göre Kübra ne kadarını yemiştir?	Bir kek 8 eşit parçaya ayrılmıştır Elif 4/8 ini Mert ise 2/8 ini yemiştir. Buna göre Kübra ne kadarını yemiştir?	6	5	6	5
F16	cake	2	6	Bir kekin 4/8 ini Elif, 2/8 ini Mert, 2/8 ini ise Kübra yemiştir. Buna göre kekin tamamı kaçtır?	Bir kekin 4/8 ini Elif, 2/8 ini Mert, 2/8 ini ise Kübra yemiştir. Buna göre kekin tamamı kaçtır?	3	4	3	4
F16	cake	3	5	Bir kek 8 eşit parçaya ayrılmıştır. Mert kekin 2/8 ini Kübra ise 2/8 ini yemiştir. Buna göre Elif ne kadarını yemiştir?	Bir kek 8 eşit parçaya ayrılmıştır. Mert kekin 2/8 ini Kübra ise 2/8 ini yemiştir. Buna göre Elif ne kadarını yemiştir?	5	5	5	5
F17	drive	1	4	Bu bilgilere göre Ali ve Hasan'ın gittiği yolu metre cinsinden 2'ye bölümü koştır?	Bu bilgilere göre Ali ve Hasan'ın gittiği yolu metre cinsinden 2'ye bölümü kaçtır?	6	6	6	6
F17	drive	2	6	Hasan'ın gittiği her kilometre, 5 dk sürdüğüne ve toplam 15 dk mola verdiğine göre Hasan yolu kaç dakikada bitirmiştir?	Hasan'ın gittiği her kilometre, 5 dk sürdüğüne ve toplam 15 dk mola verdiğine göre Hasan yolu kaç dakikada bitirmiştir?	6	6	6	6
F17	drive	3	6	Eve döndükten sonra 15 km uzaklıktaki eve gidip geldiklerine göre toplam kaç km yol gitmişlerdir?	Eve döndükten sonra 15 km uzaklıktaki eve gidip geldiklerine göre toplam kaç km yol gitmişlerdir?	6	6	6	6
F17	cake	1	6	Problem 1: Buna göre kekin en büyük ve en küçük kısmın yiyenler kimlerdir? (Sıralayınız-)	Problem 1: Buna göre kekin en büyük ve en küçük kısmın yiyenler kimlerdir? (Sıralayınız-)	6	6	6	6
F17	cake	2	5	Problem 2: 1 tane daha kek olduğuna ve onun da 8 parçaya ayrıldığı düşünülürse 2 kekin toplam kaçta kaçını Kübra yemiştir?	Problem 2: 1 tane daha kek olduğuna ve onun da 8 parçaya ayrıldığı düşünülürse 2 kekin toplam kaçta kaçını Kübra yemiştir?	6	6	6	6
F17	cake	3	4	Problem 3: Elif'in yediği kek sayısının Kübra'nın yediği kek sayısına oranının 3 katı kaçtır?	Problem 3: Elif'in yediği kek sayısının Kübra'nın yediği kek sayısına oranının 3 katı kaçtır?	6	6	6	6
F18	drive	1	6	Merzin sitti km sayısının Hasan'ın Bizziği Km Sayısına oranı kaçtır?	Mertin gitti km sayısının Hasanın gittiği Km sayısına oranı kaçtır?	6	6	6	6
F18	drive	2	4	Ali, Hasan ve Mert sizzikleri tatilden seri dönmeseydiler kişi bafi kas km yol Sitmiş olurlardı? 1. Hasan = 2. Ali = 3. Mert =	Ali, Hasan ve Mert gittikleri tatilden geri dönmeseydiler kişi başı kaç km yol gitmiş olurlardı?	4	5	4	4
F18	drive	3	4	Ali Hasan ve Mertin sürdüğü km sayısının Zoplamının 2'ye bölünmüş halinin Ondalık gösterimi Kaçtır?	Ali, Hasan ve Mertin sürdüğü km sayısının toplamının 2'ye bölünmüş halinin ondalık gösterimi kaçtır?	6	6	6	6
F18	cake	1	6	Problem 1: Elifin yediği parça sayısı, mertin yediği parça sayısının kaç katıdır?	Problem 1: Elifin yediği parça sayısı, mertin yediği parça sayısının kaç katıdır?	6	6	6	6
F18	cake	2	4	Problem 2: Elif, mert, ve Kübranın yediği parçaların toplamının %15'i Kaazır?	Elif, mert, ve Kübra'nın yediği parçaların toplamının %15'i kaçtır?	6	6	6	6
F18	cake	3	4	Problem 3: Elif mert ve Kübra'nın yediği Parçaların 4 Katının toplami Kazır?	Elif mert ve Kübra'nın yediği parçaların "4" katının toplami kaçtır?	6	6	6	6
F19	drive	1	6	Pa Parçala N Surerse danca Bura kaa kilometre göre daha araba Hasanta Mert yat αφλ lolometre	Buna göre Ali kaç kilometre daha araba sürerse Mertle aynı kilometre sürer	1	1	6	6
F19	drive	2	5	Araba göre こんどうろ kaa here kilometrede benzincide bir durduğuna durmaster	Araba 4 kere benzincide durduğuna göre kaç kilometrede bir durmuştur	1	1	6	6
F19	drive	3	4	Gidiş dönüş 3200 kilometre arabanın dönmesi pore hoa km kolmatic	Gidiş dönüş 3200 kilometre olduğuna göre arabanın dönmesi için kaç km kalmıştır	6	6	6	6
F19	cake	1	6	Bir kek 800 gramdır ve 8 parçaya ayrılmıştır. Elif 4/8 kek yediğine göre kaç gram kek yemiştir?	kek 800 gramdır ve kek 8 eşit parçaya ayrılmıştır. Elif 4/8 kek yediğine göre kaç gram kek yemiştir	6	6	6	6
F19	cake	2	5	Bir kek 8 parçaya ayrılmıştır. Elif kekin 4/8'ini, Mert 2/8'ini yemiştir. Kübra ise 100 gram yemiş. Buna göre Mert kaç liralık kek yemiştir?	Bir kek 8 parçaya ayrılmıştır. Elif kekin 4/8'ini, mert 2/8'ini ve kübra ise 2/8'ini yemiştir. Kek 1600 gramdır ve 100 gram 5 tl dir Buna göre Mert kaç liralık kek yemiştir	5	5	6	6
F19	cake	3	4	Bir kek 8 parçaya ayrılmıştır. Elif 4/8'ini, Mert 2/8'ini yemiştir. Kübra arkadaşını çağırmak istemektedir ve düşünmektedir. Buna göre Kübra herkesede eşit pay edilmesini sağlamak için en fazla kaç arkadaşını çağırabilir?	Bir kek 8 parçaya ayrılmıştır. Elif kekin 4/8'ini, Mert 2/8'ini ve kübra ise 2/8'ini yemiştir. Elif bir kaç arkadaşını daha çağırmak istemektedir ve herkesede eşit pay edilmesini düşünmektedir Buna göre en fazla kaç arkadaşını çağarabilir	4	4	4	4
F2	drive	1	6	Buna göre Ali, Hasan ve Mert 'in arabayı sürdükleri km'ye göre en küçüken büyüğe doğru kıyaslayınız.	Buna göre Ali, Hasan ve Mert'in arabayı sürdükleri km ye göre küçükten büyüğe doğru kıyaslayınız.	6	6	6	6
F2	drive	2	6	Buna göre arabayı sadece Ali ve Hasan 'ın sürdüğü yolları Mert'in süreceği düşünülürse Mert toplonda ne kadar yol sires?	Buna göre arabayı sadece Mert'in kullanacağı yani Ali ve Hasan'ın sürdüğü yolları Mert'in süreceği düşünülürse Mert toplamda cebirsel olarak ne kadar yol sürer?	6	6	6	6
F2	drive	3	6	Buna göre Ali'nin sürdüğü yol tüm yolun koaldu?	Buna göre Ali'nin sürdüğü yol tüm yolun kaçta kaçıdır?	6	6	6	6
F2	cake	1	4	Buna göre Elif'in yediği kekin oranı tüm kekin oranının kaçıdır?	Buna göre Elif'in yediği kekin oranı tüm kekin oranının kaçta kaçıdır?	3	3	3	3
F2	cake	2	4	Verilen bu bilgilere göre Mert'in ve Kübra'nın yediği toplam kekin oranı tüm kekin oranının kaça eşittir?	Verilen bu bilgilere göre Mert'in ve Kübra'nın yediği toplam kekin oranı tüm kekin oranının kaçta kaçıdır?	6	6	6	6
F2	cake	3	6	Eğer kek 16 parçaya bölünmüş olsaydı Kübra bu kekin kaçını yemiş olurdu?	Eğer kek 16 eş parçaya bölünmüş olsaydı Kübra bu kekin kaçta kaçını yemiş olurdu?	6	6	6	6
F20	drive	1	6	Buna göre araba ile toplam kaç kilometre yol gidilmiştir?	Buna göre araba ile toplam kaç kilometre yol gidilmiştir?	6	6	6	6
F20	drive	2	4	Buna göre Mert'in sürdüğü mesafe ile Ali'nin sürdüğü mesafenin çarpımı kaçtır?	Buna göre Mert'in sürdüğü mesafe ile Ali'nin sürdüğü mesafenin çarpımı kaçtır?	6	6	6	6
F20	drive	3	4	Buna göre Mert, Hasan ve Ali'nin sürdüğü mesafeleri belirleyip 10'a bölünüz ve bulduğunuz bu yeni 3 sayının toplamını yazınız.	Buna göre Mert, Hasan ve Ali'nin sürdüğü mesafeleri belirleyip 10'a bölünüz ve bulduğunuz bu yeni 3 sayının toplamını yazınız.	6	6	6	6
F20	cake	1	6	Bir kek 8 eşit parçaya ayrılmıştır. Elif kekin 4/8'ini, Mert 2/8'ini ve Kübra ise 2/8'ini yemiştir. Buna göre Elif ve Mert'in yediği toplam dilim sayısından, Kübra'nın yediği dilim sayısını çıkarınız, bunu kesir biçiminde ifade ediniz.	Bir kek 8 eşit parçaya ayrılmıştır. Elif kekin 4/8'ini, Mert 2/8'ini ve Kübra ise 2/8'ini yemiştir. Buna göre Elif ve Mert'in yediği toplam dilim sayısından, Kübra'nın yediği dilim sayısını çıkarıp bunu kesir biçiminde ifade ediniz.	6	6	6	6
F20	cake	2	6	Bir kek 8 eşit parçaya ayrılmıştır. Elif kekin 4/8'ini, Mert 2/8'ini ve Kübra ise 2/8'ini yemiştir. Buna göre dilim sayısının, tüketilen toplam dilim sayısına oranı kaçtır?	Bir kek 8 eşit parçaya ayrılmıştır. Elif kekin 4/8'ini, Mert 2/8'ini ve Kübra ise 2/8'ini yemiştir. Buna göre dilim sayısının, tüketilen toplam dilim sayısına oranı kaçtır?	6	6	6	6
F20	cake	3	6	Bir kek 8 eşit parçaya ayrılmıştır. Elif kekin 4/8'ini, Mert 2/8'ini ve Kübra ise 2/8'ini yemiştir. Buna göre Elif'in yediği dilim sayısından Kübra ve Mert'in yediği toplam dilim sayısını çıkarınız.	Bir kek 8 eşit parçaya ayrılmıştır. Elif kekin 4/8'ini, Mert 2/8'ini ve Kübra ise 2/8'ini yemiştir. Buna göre Elif'in yediği dilim sayısından Kübra ve Mert'in yediği toplam dilim sayısını çıkarınız.	6	6	6	6
F21	drive	1	6	3'ünün gittiği km'nin toplamı kaç olur?	3'ünün gittiği km'nin toplamı kaç olur?	6	6	6	6
F21	drive	2	5	Buna göre Mert ve Harad'ın sürdüğü km suresi ne kadardır?	Buna göre Mert ve Hasan'ın sürdüğü km süresi ne kadardır?	6	6	6	6
F21	drive	3	0			0	0	0	0
F21	cake	1	4	Buna göre Elif, Mert'ten ve Kübra'dan 2 kat fazla yerse, geri kalanların yiyeceği parça sayısı ne kadar azalır?	Buna göre Elif, Mert'ten ve Kübra'dan 2 kat fazla yerse, geri kalanların yiyeceği parça sayısı ne kadar azalır?	4	4	4	4
F21	cake	2	4	Herkese eşit olarak dağıtılırsa kalan parça sayısı Ne kadar olur?	Herkese eşit olarak dağıtılırsa kalan parça sayısı ne kadar olur?	6	6	6	6
F21	cake	3	6	3 arkadaşın yediği kekin toplamı kaçtır?	3 arkadaşın yediği kekin toplamı kaçtır?	6	6	6	6
F22	drive	1	6	Buna göre, bu araba toplam kaç km gitmiştir? (gidiş ve dönüş)	Buna göre, bu araba toplam kaç km gitmiştir? (gidiş ve dönüş)	6	6	6	6
F22	drive	2	6	Kim kas km gitmiştir?	Kim kaç km gitmiştir?	6	6	6	6
F22	drive	3	6	Hasan ile Mert toplam kaç km sürmüştür?	Hasan ile Mert toplam kaç km sürmüştür?	6	6	6	6
F22	cake	1	6	Problem 1: Buna göre Elif, Mertten kaç dilim fazla kek yemiştir?	Problem 1: Buna göre Elif, Mertten kaç dilim fazla kek yemiştir?	6	6	6	6
F22	cake	2	6	Problem 2: Bu bilgilerden yola çıkarak, Kübra ile Mert in yediği dilim kek sayısı ile Elif 'in yediği dilim kek sayısını karşılaştırınız.	Bu bilgilerden yola çıkarak, Kübra ile Mert'in yediği dilim kek sayısı ile Elif'in yediği dilim kek sayısını karşılaştırınız.	6	6	6	6
F22	cake	3	6	Problem 3: Daha sonra aralarına katılan Alp, elinde 24 eşit parçaya bölünmüş bir doğum günü pastası ile gelmiş ve Elif'in doğum gününü kutlamışlar. Alp bu kekin 3 'ini yediğine ve diğer 3 kişininde ilk yedikleri kek dilimi kadar yediklerine göre, toplam kas dilim yemişlerdir?	Daha sonra aralarına katılan Alp, elinde 24 eşit parçaya bölünmüş bir doğum günü pastası ile gelmiş ve Elif'in doğum gününü kutlamışlar. Alp bu kekin 3/8'ini yediğine ve diğer 3 kişininde ilk yedikleri kek dilimi kadar yediklerine göre, toplam kaç dilim yemişlerdir?	6	6	6	6
F23	drive	1	6	Buna göre Mert ile Hasan'ın km" cinsinden araba sürdüğü miktarı yazınız."	Buna göre Mert ile Hasan'ın arabayı sürdüğü miktarı "km" cinsinden yazınız.	6	6	6	6
F23	drive	2	5	Hafta içi ise her kişi, hafta sonu sürdüğü miktarın 1/2 'sini sürdüğüne ve hafta sonu araba sürme miktarı kişi başına 2 saat olduğuna göre, Hasan hafta içi toplam kaç saat araba sürmüştür?	Hafta içi ise her kişi, hafta sonu sürdüğü miktarın 1/2 'sini sürdüğüne ve hafta sonu araba sürme miktarı kişi başına 2 saat olduğuna göre, Hasan hafta içi toplam kaç saat araba sürmüştür?	6	6	6	6
F23	drive	3	6	Hepsi toplam kaç km araba sürmüştür?	Hepsi toplam kaç km araba sürmüştür?	6	6	6	6
F23	cake	1	6	Problem 1: Buna göre Elif ve Kübra'nın yediği parça sayısının, tüm bir kekin toplam parça sayısına oranı nedir?	Problem 1: Buna göre Elif ve Kübra'nın yediği parça sayısının, tüm bir kekin toplam parça sayısına oranı nedir?	6	6	6	6
F23	cake	2	4	Problem 2: Torık da bu kekin 1/24'ünü yemek istemiştir. Buna göre bu kişilerden kek yiyebilenlerin, yiyemeyenlere oranını yazınız. (yiyemeyen kişi yoksa tam sayı halinde yazınız.)	Tarık da bu kekin 1/24'ünü yemek istemiştir. Buna göre bu kişilerden kek yiyebilenlerin, yiyemeyenlere oranını yazınız. (yiyemeyen kişi yoksa tam sayı halinde yazınız.)	6	6	6	6
F23	cake	3	3	Problem 3: Bu kek 56 parçaya bölünmüş olsaydı, yenilen porçalarda ortış veya ozclış olur muydu? Ortış veya ozclış miktarını '%' cinsinden yozınız.	Bu kek 56 parçaya bölünmüş olsaydı, yenilen parçalarda artış veya azalış olur muydu? (artış veya azalış miktarını '%' cinsinden yazınız.	6	6	6	6
F24	drive	1	6	Banu göre Husen ve mertin gitti-gi km ne kadardır?	Buna göre Hasan ve mertin gittiği km ne kadardır?	6	6	6	6
F24	drive	2	6	Alinin Ikittiği kmnin Mertin gitti-gi km ye oranı nedir?	Alinin gittiği kmnin Mertin gittiği km ye oranı nedir?	6	6	6	6
F24	drive	3	5	Hason donul sonra kalan golun yüz deliği nedir? Kim kaç yüzde likte Gitmiştir belirtiniz?	Hasandan sonra kalan yolun yüzdeliği nedir? Kim kaç yüzdelikte gitmiştir belirtiniz?	6	5	6	5
F24	cake	1	6	Elif ve Mertin yediği kekin Kübranın yediği keke oranı Ve kalon kekin kesirli ifadesi kaçtır.	Elif ve Mert'in yediği kekin Kübra nın yediği keke oranı? Ve kalan kekin kesirli ifadesi kaçtır.	6	6	6	6
F24	cake	2	6	Mertin yediği kekin yüzdeliği kaçtır? Katun yüzdelik nedir.	Mertin yediği kekin yüzdeliği kaçtır? Kalan yüzdelik nedir.	6	6	6	6
F24	cake	3	3	Kübra'nın yedi kekin yüzdeliğine kimin yediği kekin yüzdeliği eşittir?	Kübra'nın yedi kekin yüzdeliğine kimin yediği kekin yüzdeliği eşittir?	6	6	6	6
F25	drive	1	6	Problem 1: Mert, Ali'den kaç km fazla araba kullanmıştır b	Mert, Ali'den kaç km fazla araba kullanmıştır?	6	6	6	6
F25	drive	2	6	Problem 2: Ali, Hasan ve Mert bu sıralama ile arabayı kullandıklarına göre gittikleri yolun yarısında arabayı kim kullanmıştır.	Problem 2: Ali, Hasan ve Mert bu sıralama ile arabayı kullandıklarına göre gittikleri yolun yarısında arabayı kim kullanmıştır.	6	6	6	6
F25	drive	3	6	Problem 3: Büyükten küçüğe doğru gidilen golv ve arabuy, az kullonundan çok lellenano doğru skeayla yazınız.	Büyükten küçüğe doğru gidilen yolu ve arabayı az kullanandan çok kullanana doğru sırayla yazınız.	6	6	6	6
F25	cake	1	4	Elif, yediği kekin 1/4'ini Kübraya, Kübra yediği kekin tamamını Elif'e verdiğine göre, Elif kekin kaçta kaçını yemiştir?	Elif, yediği kekin 1/4'ini Kübra'ya, Kübra yediği kekin tamamını Elif'e verdiğine göre, Elif kekin kaçta kaçını yemiştir?	6	6	6	6
F25	cake	2	4	Mert, yediği kekin 1/3'ini Kübraya, Kübra kendi kekinin yarısını Elif'e verdikten sonra Elif, Kübraya verdiği kekin 2 katını geri verdiğinde son duruma göre Kübra'nın kekin kaçta kaçını yediğini bulunuz.	Mert, yediği kekin 1/8'ini Kübra'ya, Kübra kendi kekinin yarısını Elif'e verdikten sonra Elif, Kübra'ya verdiği kekin 2 katını geri verdiğinde son duruma göre Kübra'nın kekin kaçta kaçını yediğini bulunuz.	6	4	6	6
F25	cake	3	5	Elif, kekinin yarısını yemiştir kalan kekinin 1/4'ini Mert'e, 1/4'ini Kübraya vermiştir. Son durumda Kübra ve Mert'in yediği kek sayısını yazınız.	Elif, kekinin yarısını yemiştir kalan kekinin 1/4'ini Mert'e, 1/4'ünü Kübra'ya vermiştir. Son durumda Kübra ve Mert'in yediği kek sayısını yazınız.	6	6	6	6
F26	drive	1	2	Problem 1: Erva, Miroyne Neslihan bir kek yapmışlardır, Miroy Ervador 240 gr fazla yemiştir. Erva, Neslihan' ın yediği lekin 9 katını yemiştir, Neslihan 80gr kek yemiştir.	Erva, Miray ve Neslihan bir kek yapmıslardır. Miray Erva'dan 240 gr fazla yemistir. Erva, Neslihan'ın yediği kekin 9 katını yemistir. Neslihan 80 gr kek yemistir.	2	2	2	2
F26	drive	2	2	Problem 2: Nilgün, Güray, Gil telefon oynama saatlerini paylasacable Nilgün Gül den 240 de fazla izlemiştir. Gül, Güray'ın izledisi dk'mın 9 katını işlemistic Gunay 80 lk izlemiştir	Nilgün, Güray, Gül telefon oynama saatlerini paylasacaklar. Nilgün Gül'den 240 dk fazla izlemistir. Gül, Güray'ın izlediği dk'nın 9 katını izlemistir. Güray 80 dk izlemistir	2	2	2	2
F26	drive	3	2	Problem 3: Gökhan, Yosut, Miraç akuman saatlerini paylaşacakler Miraç Gökhan'den 240 dk akumuştur. Gökhan, Yosuf'un okuduğu soy fenin e katını duruştur. Yusuf 80 dk olumustar	Gökhan, Yusuf, Miraç okuma saatlerini paylaşacaklar Miraç Gökhan'dan 240 dk az okumuştur. Gökhan, Yusuf'un okuduğu sayfanın 9 katını okumuştur. Yusuf 80 dk okumuştur	2	2	2	2
F26	cake	1	2	Bir turta 8 eşit parçaya ayrılmıştır. Miray kekin 2/8 ini, Erva 4/8 ini, Neslihan ise 2/8 ini yemiştir.	Bir turta 8 eşit parçaya ayrılmıştır. Miray kekin 2/8'ini, Erva 4/8'ini, Neslihan ise 2/8'ini yemiştir.	2	2	2	2
F26	cake	2	2	3 çocuk 1 arabayı yol mesafesi ile paylaşmıştır. Gökhan 4/8'ünü, Yusuf 2/8 ini, Miray ise 2/8 yol mesafesi almıştır.	3 çocuk 1 arabayı yol mesafesi ile paylaşmıştır. Gökhan 4/8'ünü, Yusuf 2/8'ini, Miraç ise 2/8 yol mesafesi almıştır.	2	2	2	2
F26	cake	3	2	Bir postaneci elemanlarına çalışma süresi vermiştir. Nilgün 2/8 ini, Güney 2/8 ini, Gül ise 4/8 çalışmışlardır.	Bir pastaneci elemanlarına çalışma süresi vermiştir. Nilgün 2/8'ini, Güney 2/8'ini, Gül ise 4/8 çalışmışlardır.	2	2	2	2
F27	drive	1	6	bu bilgilere gore toplam yol kaf km'dir?	bu bilgilere gore toplam yol kaç km'dir?	6	6	6	6
F27	drive	2	6	Bunlara gore Mert kaç km araba sürmüştür?	Bunlara göre Mert kaç km araba sürmüştür?	6	6	6	6
F27	drive	3	6	Yukarıda verilen bilgilere göre Hasan Aliden kaç km fazla sürmüştür?	Yukarıda verilen bilgilere göre Hasan Aliden kaç km fazla sürmüştür	6	6	6	6
F27	cake	1	6	Yukarıda verilen bilgilere göre elif kekin 16'da kaçını yemiştir?	Yukarıda verilen bilgilere göre elif ile mert kekin 16'da kaçını yemiştir?	6	6	6	6
F27	cake	2	6	Leki en fok kim yemiştir? Büyükten küçüğe sıralayın	Keki en çok kim yemiştir? Büyükten küçüğe sıralayın	6	6	6	6
F27	cake	3	5	Kekin 4/8'i muzlu, 2/16'ı çilekli diğer 4/16'sı ise çikolatalıdır. Elif ve Kübra tüm keklerin yarısını yediyse, Merte kaç dilim kalır?	Kekin 4/16'ü muzlu, 8/16'i çilekli diğer 4/16'lük kısmıı ise çikolatalıdır. Elif ve Kübra tüm keklerin yarısını yediyse, Merte kaç dilim kalır?	4	4	5	5
F28	drive	1	6	Problem 1: Yukarıdaki bilgilere göre hasan kaç km araba Sürmüştür?	Problem 1: Yukarıdaki bilgilere göre hasan kaç km araba Sürmüştür?	6	6	6	6
F28	drive	2	6	Problem 2: Bu bilgilere göre Bu üç kişinin Tatol dönüsünde kaç km yol ilerlemesi gerekir?	Bu bilgilere göre Bu üç kişinin tatil dönüşünde kaç km yol ilerlemesi gerekir?	6	6	6	6
F28	drive	3	6	Problem 3: Bu bilgilere göre üç arkadaşın araba Sürdüzleri Yol km'sini büyükten küçüğe Sıralayınız?	Bu bilgilere göre üç arkadaşın araba sürdükleri Yol km'sini büyükten küçüğe sıralayınız?	6	6	6	6
F28	cake	1	4	Elifin Jediği kek sayısının 1/3 fazlası kaçtın	Elifin yediği kek sayısının 1/8 fazlası kaçtır.	6	6	6	6
F28	cake	2	6	Elif, mert ve kübra 2 tane kez almıştır ve 16 dillime bölmüşlerdir. Elif kekin 8/16'ini Mert 4/16'ünü kübra ise 4/16'ünü yiyecektir fakat kübra Kendine düşen parçalardan birini yememiştir. Buna göre Bu üç kişi kekin kaçta kaçını yemişlerdir.	Elif, mert ve kübra 2 tane kek almıştır ve 16 dillime bölmüşlerdir. Elif kekin 8/16'ini Mert 4/16'ünü kübra ise 4/16'ünü yiyecektir fakat kübra kendine düşen parçalardan birini yememiştir. Buna göre Bu üç kişi kekin kaçta kaçını yemişlerdir.	6	6	6	6
F28	cake	3	4	Yukarıdaki bilgilere göre kübra 1, Elif 3, Mert'te 2 dilim kez yemezse kekin kaçta kalır.	Yukarıdaki bilgilere göre kübra 1, Elif 3, Mert'te 2 dilim kez yemezse kekin kaçta kalır.	6	6	6	6
F29	drive	1	5	Problem 1: Bir yolculukta iki arkadaş dönüşümlü araba sürmüştür. Ali 80, Hasan Ali'nin 9 katı, Mert de Hasan'dan 240 az sürmüştür. Buna göre Ali 30 km daha az sürseydi, Hasan kaç km sürmüş olurdu?	Problem 1: Bir yolculukta iki arkadaş dönüşümlü araba sürmüştür. Ali 80, Hasan Ali'nin 9 katı, Mert de Hasan'dan 240 az sürmüştür. Buna göre Ali 30 km daha az sürseydi, Hasan kaç km sürmüş olurdu?	6	6	6	6
F29	drive	2	5	Problem 2: Eğer Ali 120 km araba sürmüş olsaydı, Mert'in Sürdüğünün Ali'nin sürdüğüne oranı kaç olurdu?	Problem 2: Eğer Ali 120 km araba sürmüş olsaydı, Mert'in Sürdüğünün Ali'nin sürdüğüne oranı kaç olurdu?	6	6	6	6
F29	drive	3	5	Problem 3: Mer, Hasa'dan 180 km daha fazla sürmüş olsaydı Mert'in sürdüğü, Ali'nin sürdüğünden kaç km daha fazla olurdu?	Mert, Hasan'dan 180 km daha fazla sürmüş olsaydı Mert'in sürdüğü, Ali'nin sürdüğünden kaç km daha fazla olurdu?	6	6	6	6
F29	cake	1	6	8 eş parçaya ayrılan bir kekin, Mert ve Kübra çeyreğini, kalanını da Elif Yediğine göre; Elif'in yediği, Mert'in yediğinin kaç katıdır?	8 eş parçaya ayrılan bir kekin, Mert ve Kübra çeyreğini, kalanını da Elif Yediğine göre; Elif'in yediği, Mert'in yediğinin kaç katıdır?	6	6	6	6
F29	cake	2	4	8 eş parçaya ayrılan bir kekin; Elif 1/2 sini, Mert 1/4'ünü, kalanını da Kübra yemiştir. Buna göre Mert ve Kübra toplam 3 dilim daha fazla yeseydi ikisinin toplamı, Elif'ten kaç fazla olurdu?	8 eş parçaya ayrılan bir kekin; Elif 1/2 sini, Mert 1/4'ünü, kalanını da Kübra yemiştir. Buna göre Mert ve Kübra toplam 3/8 dilim daha fazla yeseydi ikisinin toplamı, Elif'ten kaç fazla olurdu?	6	6	6	6
F29	cake	3	4	Bir kek 8 eş parçaya ayrılmıştır. Elif yarısını, Kübra ve Mert ise çeyreğini yemiştir. Buna göre Elif Kübra'ya 3, Mert'e 2 dilim versey di en çok yiyen kim olurdu?	Bir kek 8 eş parçaya ayrılmıştır. Elif yarısını, Kübra ve Mert ise çeyreğini yemiştir. Buna göre Elif Kübra'ya 3, Mert'e 2 dilim verseydi en çok yiyen kim olurdu?	4	4	4	4
F3	drive	1	6	Ali, Hasan ve Mert birlikte ayrı arabayla tatile gitmiştir. Dönüşte Mert, Hasan'dan 240 kn az araba sürmüştür. Hasan Ali'nin sürdüğü miktarın 9 katı araba sürmüştür. Ali 80 km araba sürdüğüne göre Hasan kaç km araba sürmüştür?	Ali, Hasan ve Mert birlikte ayrı arabayla tatile gitmiştir. Dönüşte Mert, Hasan'dan 240 km az araba sürmüştür. Hasan Ali'nin sürdüğü miktarın 9 katı araba sürmüştür. Ali 80 km araba sürdüğüne göre Hasan kaç km araba sürmüştür?	6	6	6	6
F3	drive	2	6	Bu bilgiye göre Hasan ve Mertin dönüşte kaç kn araba surduğunü toplamını bulunuz?	Bu bilgiye göre Hasan ve Mertin dönüşte kaç km araba sürdüğünü toplamını bulunuz?	6	6	6	6
F3	drive	3	6	Toplam kaç km yol pidilmiştir?	Toplam kaç km yol gidilmiştir?	6	6	6	6
F3	cake	1	5	Bir kek 8 eşit parçaya ayrılmıştır. Mert 2/8'ini ve Kübra ise 3/8'ini yemiştir. Buna göre Elif kekin kaçta kaçını gemiştir?	Bir kek 8 eşit parçaya ayrılmıştır. Mert 2/8'ini ve Kübra ise 2/8'ini yemiştir. Buna göre Elif kekin kaçta kaçını gemiştir?	6	5	5	5
F3	cake	2	6	Kübranın yediği dilim sayısı, Elif ile Mertin yediği dilim sayıları ile arasındaki Park kaçtırd	Kübranın yediği dilim sayısı, Elif ile Mertin yediği dilim sayıları ile arasındaki Fark kaçtır?	6	6	6	6
F3	cake	3	6	Elif ve Mertin kek dilimleri toplanı kaçtır.	Elif ve Mertin kek dilimleri toplamı kaçtır.	6	6	6	6
F30	drive	1	6	Yol Kaç km dur?	Yol Kaç km dir?	6	6	6	6
F30	drive	2	4	Alinin ydu Mert ve Hasandon ektasındaki fark kaçtın?	Ali'nin yolu Mert ve Hasandan arasındaki fark kaçtır?	4	6	6	6
F30	drive	3	6	Hom Kaç km lobe Surmüştür?	Hasan kaç km araba sürmüştür?	6	6	6	6
F30	cake	1	4	Bir Kek 8 parçaya bölünüyor. Elif Kekin 4/8 ini mert 2/8 ini Kübra ise 2/8 ini yeniştir. Kübra 2 parça daha yerse kekin 3/8'ini yemiş oluyor. Buna göre Kübra'nın ilk yediği parça ile şimdiki yediği pastandiliminin aluvindak folk Elif den Kuç azdır?	Bir Kek 8 parçaya bölünüyor. Elif Kekin 4/8'ini mert 2/8'ini Kübra ise 2/8'ini yemiştir. Kübra 2 parça daha yerse kekin 3/8'ini yemiş oluyor. Buna göre Kübra'nın ilk yediği parça ile şimdiki yediği pasta diliminin arasındaki fark Elif'den kaç azdır?	4	4	4	4
F30	cake	2	4	Elifin kekinin Ondalık gouterier ile Meltve Kubion.. ondelik goutermi aroundok Falk Koçtur?	Elif'in kekinin ondalık gösterimi ile Mert ve Kübranı ondalık gösterimi arasındaki fark kaçtır?	6	6	6	6
F30	cake	3	3	Eliflin kekmm oranı kaçtır?	Elif'in kekinin oranı kaçtır?	3	3	3	3
F31	drive	1	6	Buna göre gidecekleri yolun. Hasanın gittisi yolla forler kaştır	Buna göre gidecekleri yolun Hasanın gittiği yolla farkı kaçtır	6	6	6	6
F31	drive	2	6	Buna göre her 100 kmde 1L Benzin horoser Greçta 15L Benzin állyğuna göra enson kag L beran kalmıştır	Buna göre her 100 kmde 1L Benzin harcıyor araçta 15L Benzin olduğuna göra en son kaç L benzin kalmıştır	6	6	6	6
F31	drive	3	4	Buna göre Ali ile Hasanın sürdüğü km Saylının 100 eksiğinin 2 kazı keştır	Buna göre Ali ile Hasanın sürdüğü km sayılarının 100 eksiğinin 2 katı kaçtır	6	6	6	6
F31	cake	1	4	Buna göre Elif ve Mert'in yediği dilimlerin çarpımı kaçtır?	Buna göre Elif ve Mert'in yediği dilimlerin çarpımı kaçtır	4	4	4	4
F31	cake	2	4	Buna göre Mert ve Kübra'nın yediği dilim sayısının 8 katı ile Elif'in yediği dilim arasındaki fark kaçtır?	Buna göre Mert ve Kübranın yediği dilim sayısının 8 katı ile Elifin yediği dilim arasındaki fark kaçtır	6	6	6	6
F31	cake	3	6	Buna göre bir dilim kek 70 kalori ise Mert kaç kalori almıştır?	Buna göre bir dilim kek 70 kalori ise Mert kaç kalori almıştır	6	6	6	6
F32	drive	1	6	Hasan ile Mert toplam kaç km sürmüştür?	Hasan ile Mert toplam kaç km sürmüştür?	6	6	6	6
F32	drive	2	6	Toplam yol ne kadardır?	Toplam yol ne kadardır?	6	6	6	6
F32	drive	3	6	Mert'in sürdüğü kilometre sayısı Ali'nin kaç katıdır?	Mert'in sürdüğü kilometre sayısı Ali'nin kaç katıdır?	6	6	6	6
F32	cake	1	1	Bir kek diliminin bir kenarı bir cm olduğuna göre Elif'in Mert'in ve Kübranın yediği dikdörtgen kelin çevreleri toplamı kaçtır	Bir kek diliminin bir kenarı bir cm olduğuna göre Elif'in Mert'in ve Kübranın yediği dikdörtgen kekin çevreleri toplamı kaçtır	5	5	5	5
F32	cake	2	6	Kübra yediği kekten 250 kalori almıştır buna göre Elif ve Mert'in yedikleri kekler aldıkları toplam kalori kaçtır	Kübra yediği kekten 250 kalori almıştır buna göre Elif ve Mert'in yedikleri kekler aldıkları toplam kalori kaçtır	6	6	6	6
F32	cake	3	5	Elif yediği toplam kekten aldığı 500 kaloriyi yakmak için 4 saat (60 dk) koştuğuna göre Elif ve Mert toplam kaç dk koşmalıdır	Elif yediği toplam kekten aldığı 500 kaloriyi yakmak için 1 saat (60 dk) koştuğuna göre Elif ve Mert toplam kaç dk koşmalıdır	4	4	6	6
F33	drive	1	6	Hasan, Ali ve Mert hepsi birlikte bir Sahile gitmek için arabayla gitmeye karar vermişlerdir. Dönüşümlü olarak probay kullarak ilerlemişlerdir. Mert hasan dan 240 km az gitmişlir Hasan ve Ali'nin Sürdüğünde 9 katı kadar araba sürmüştür ve Ali 80 km araba sürmüştür Peki Mert ve Hasan hangi miktarda sürmüşlerdir?	Hasan, Ali ve Mert hepsi birlikte bir Sahile gitmek için arabayla gitmeye karar vermişlerdir. Dönüşümlü olarak arabayı kullanarak ilerlemişlerdir. Mert hasandan 240 km az gitmiştir, Hasan ise Ali'nin sürdüğünün 9 katı kadar araba sürmüştür ve Ali 80 km araba sürmüştür. Peki Mert ve Hasan hangi miktarda sürmüşlerdir?	6	6	6	6
F33	drive	2	6	Ali, Mert ve Hasm en birlikte yarış yapmayan haver urmişlerdir. Hepsi birlikk arabayla yors Yapraja başlamativ, Lason, Alimin Surdüğünden I hatı giasury Ment hasondan 2404m 92 süromastar Ali ise 80 lim'ye kadar gittin buna gira hepsinin tuplamı kaçtır?	Ali, Mert ve Hasan üçü birlikte yarış yapmaya karar vermişlerdir. Hepsi birlikte arabayla yarış yapmaya başlamıştır. Hasan, Ali'nin surdüğünden 9 katı gitmiştir. Mert hasandan 240 km az sürmüştür. Ali ise 80 km'ye kadar gitmiştir buna göre hepsinin toplamı kaçtır?	6	6	6	6
F33	drive	3	4	Ali, Arkadaşınyla birlikte Geriye gideriknir, Mert hasından tholim az gitmiztir, Mason ise Ali'nin sürdüğünden O kayı farla kim gitmarif. Ali isesadece 80 kombin Bitmştir. O zaman Mert ve Hasinin farklannin toplamı? lahtir?	Ali, Arkadaşınyla birlikte Geziye gidecektir, Mert hasandan 240 km az gitmiştir, Hasan ise Ali'nin sürdüğünden 9 katı fazla km gitmiştir. Ali ise sadece 80 km hızla gitmiştir. O zaman Mert ve Hasan'ın farklarının toplamı kaçtır?	4	4	4	4
F33	cake	1	6	Elifin doğum günü için şekilli kek alınmıştır, herkes kekin 8 eşit parçaya ayırmışlardır. Peki Elif kekin 4/8 ini, Mertin 2/8 ini ve Kübra 1/8 ini yediyse geriye kalan kek ne kadar kalmıştır?	Elifin doğum günü için çilekli kek alınmıştır, herkes keki 8 eşit parçaya ayırmışlardır. Peki Elif kekin 4/8'ini, Mert'in 2/8'ini ve Kübra 2/8'ini yediyse geriye kalan kek ne kadar kalmıştır?	6	6	6	6
F33	cake	2	6	Mert ve arkadaşları Annesi onlara ovalanmalı kek yapmıştır. Kek 8 dilime ayrılmıştır buna göre: Elif kekin 4/8 ini Mertin 2/8 ini ve Kübra ise 1/8 ini yemiştir Peki Yedikleri oran kaçtır toplam?	Mert ve arkadaşlarına Annesi onlara vanilyalı kek yapmıştır, kek 8 dilime ayrılmıştır buna göre; Elif kekin 4/8'ini Mert'in 2/8'ini ve Kübra ise 2/8'ini yemiştir Peki Yedikleri oran kaçtır toplam?	6	6	6	6
F33	cake	3	4	Mert, Kübra ve Elif pastanede muzlu kek almıştır ve 8 dilim dilim bulanmıştır. Peki Elif 4/8 ini yediyse ve Kübra ve Mert 2/8 ini yediyse Eğer kaç kişi daha katılırsa bu kekin tamamını yenilir?	Mert, Kübra ve Elif pastanede muzlu kek almıştır, ve 8 dilim dilim bölünmüştür, Peki Elif 4/8'ini yediyse ve Kübra ve Mert 2/8'ini yediyse Eğer kaç kişi daha katılırsa bu kekin tamamını yenilir?	4	4	4	4
F34	drive	1	6	Mert, Hasan'dan 240 km az, Ali 80km, Hasan ise Ali'nin sürdüğü miktarın 9 katı kadar sürmüştür. Buna göre yol kaa km'dir?	Mert, Hasan'dan 240 km az, Ali 80km, Hasan ise Ali'nin sürdüğü miktarın 9 katı kadar sürmüştür. Buna göre yol kaç km'dir?	6	6	6	6
F34	drive	2	6	Hasan Ali'nin sürdüğü miktarın 9 katı kadar, Ali 80 km... Mert ise Hasanın sürdüğünden 240 km ar araba sürmüştür. Hasan kaç km araba sürmüştür?	Hasan Ali'nin sürdüğü miktarın 9 katı kadar, Ali 80 km Mert ise Hasan'ın sürdüğünden 240 km az araba sürmüştür. Hasan kaç km araba sürmüştür?	6	6	6	6
F34	drive	3	6	Hasan Ali'nin sürdüğü miktarın 9 katı kader, Ali 80 km Mert ise Hason Iın sürdüğünder 240km ar araba sürmüştür. Buna göre Hasan ve Ali'nin sürdüğü km Mertin sürdüğü km'den kaça fazladır?	Hasan Ali'nin sürdüğü miktarın 9 katı kadar, Ali 80 km Mert ise Hasan'ın sürdüğünden 240km az araba sürmüştür. Buna göre Hasan ve Ali'nin sürdüğü km Mertin sürdüğü km'den kaç fazladır?	6	6	6	6
F34	cake	1	6	Problem 1: Elif arkadaşları ile kekini bölüşecektir. Kendisine 4/8'ini, Mert'e 2/8'ini, Kübra'ya ise 2/8'ini vermiştir. Buna göre kek'ün kaçta kaçı yenmiştir?	Elif arkadaşları ile kekini bölüşecektir. Kendisine 4/8'ini, Mert'e 2/8'ini, Kübra'ya ise 2/8'ini vermiştir. Buna göre kek'in kaçta kaçı yenmiştir?	6	6	6	6
F34	cake	2	6	Problem 2: Elif kardeşleri ile kekini bölüşecektir. Kendisine kekin yarısını, Mert'e kalan kekin yarısını vermiştir. Verilen bilgilere göre Kübra'ya kekin kaçta kaçı kalmıştır? ( Kek 8 parçaya bölünmüştür ve tamamı 8/8'dir.)	Elif kardeşleri ile kekini bölüşecektir. Kendisine kekin yarısını Mert'e kalan kekin yarısını vermiştir. Verilen bilgilere göre Kübra'ya kekin kaçta kaçı kalmıştır? ( Kek 8 parçaya bölünmüştür ve tamamı 8/8'dir.)	6	6	6	6
F34	cake	3	6	Problem 3: Bir kek 8 parçaya bölünmüştür. Elif kekin 4/8'ini, Mert 2/8'ini, Kübra ise 3/8'ini yemiştir. Bu bilgilere göre Mert ve Elif'in yediği kek Kübra'nın kekinden ne kadar fazladır?	Bir kek 8 parçaya bölünmüştür. Elif kekin 4/8 ini, Mert 2/8'ini, Kübra ise 2/8'ini yemiştir. Bu bilgilere göre Mert ve Elif'in yediği kek Kübranın kekinden ne kadar fazladır?	4	4	6	6
F35	drive	1	6	Ali, Hasan ve Mert aynı arabayla hafta sonu tatili için gittikleri geziden geri dönmektedir. Dönüşümlü olarak arabayı kullanarak eve varmışlardır. Bu yolculukta Mert, Hasan'dan 240 km az araba sürmüştür. Buna göre Hasan ve Mert'in sürdüğü araba miktarlarının toplamı kaçtır?	Ali, Hasan ve Mert aynı arabayla hafta sonu tatili için gittikleri geziden geri dönmektedir. Dönüşümlü olarak arabayı kullanarak eve varmışlardır. Bu yolculukta Mert, Hasandan 240 km az araba sürmüştür. Hasan, Ali'nin sürdüğü miktarın 9 katı kadar araba sürmüştür. Ali 80 km araba sürmüştür. Buna göre Hasan ve Mert'in sürdüğü araba miktarlarının toplamı kaçtır?	5	5	6	6
F35	drive	2	6	Bu arkadaşların toplam sürdüğü araba miktarı ne dir?	Bu arkadaşların toplam sürdüğü araba miktarı ne dir?	6	6	6	6
F35	drive	3	4	Mert adlı arkadaş ve Ali adlı arkadaşın toplam sürdüğü araba miktarını, Aliden Çıkartın. Kaçtır?	Mert adlı arkadaş ve Ali adlı arkadaşın toplam sürdüğü araba miktarını, Ali'den çıkartın kaçtır?	4	4	6	6
F35	cake	1	6	Bir keki 3 arkadaş paylaşmak istemiştir. Elif 4/8'ini, Mert 2/8'ini aldığına göre Kübra'ya ne kalmıştır?	Bir keki 3 arkadaş paylaşmak istemiştir. Elif 4/8'ini, Mert 2/8'ini aldığına göre Kübra'ya ne kalmıştır?	6	6	6	6
F35	cake	2	6	Bir kek 8 eşit parçaya ayrılmıştır. Bu kekin 2/8'ini Kübra yemiştir, 6/8'sını da Elif yediğine göre Mert'le ne kadar kalmıştır?	Bir kek 8 eşit parçaya ayrılmıştır. Bu kekin 2/8'ini Kübra yemiştir, 8/16'sını da elif yediğine göre mert'e ne kadar kalmıştır?	6	6	6	6
F35	cake	3	6	Bir kek paylaştırılacaktır, Elif kekin 4/8'sını, Kübra 2/8'sını almıştır. Mert'e ne kadar kalmıştır? Paydası 8 olacak şekilde Mert'i bulunuz.""	Bir kek paylaştırılacaktır, elif kekin 8/16'sını, Kübra 4/16'sını almıştır. Mert'e ne kadar kalmıştır? "Paydası 8 olacak şekilde Mert'i bulunuz".	6	6	6	6
F36	drive	1	6	Buna göre üçü toplam kaçı km yol kat etmişlerdir?	Buna göre üçü toplam kaç km yol kat etmişlerdir?	6	6	6	6
F36	drive	2	6	Buna göre Hasanın kaç km sürdüğünü cebirsel ifade olarak bulunuz.	Buna göre Hasanın kaç km sürdüğünü cebirsel ifade olarak bulunuz.	4	4	4	4
F36	drive	3	6	Buna göre Mertin Ali ile Hasarın toplanı gittiği yolun oranı ni en sade şekilde yazınız.	Buna göre Mert'in, Ali ile Hasanın toplam gittiği yolun oranını en sade şekilde yazınız.	6	6	6	6
F36	cake	1	6	Buna göre geriye ne kadar kek kalmıştır	Buna göre geriye ne kadar kek kalmıştır	6	6	6	6
F36	cake	2	6	Bu keklerin 4/8': 800 kalori olduğuna göre Elif ile Mert toplam kaa kalori almıştır.	Bu keklerin 4/8'i 800 kalori olduğuna göre Elif ile Mert toplam kaç kalori almıştır	6	6	6	6
F36	cake	3	5	Bu kek 10 eşit parciaya ayrılsaydı ve Mert 4/10'unu yeseydi Elif ile Kübranın yediği kek Sayısının Mert der kaa fazla olduğunu bulunuz	Bu kek 10 eşit parciaya ayrılsaydı ve Mert 4/10'unu yeseydi Elif ile Kübranın yediği kek sayısının Mert'den kaç fazla olduğunu bulunuz	5	5	5	5
F37	drive	1	6	Melisa, Miraç ve Masal birlikte aynı arabayla hafta sonu tatili gittikleri geziden geri dönmektedir. Dönüşümlü olarak arabayı kullanarak yolculuğu tamamlamışlardır. Miraç, Melisa'dan 240 km fazla araba sürmüştür. Masal Melisa'nın sürdüğü miktarın 9 katı kadar araba sürmüştür. Miraç 80 km araba sürdüyse toplam kaç km yol gitmişlerdir.	Melisa, Miraç ve Masal birlikte aynı arabayla hafta sonu için gittikleri geziden geri dönmektedir. Dönüşümlü olarak arabayı kullanarak yolculuğu tamamlamışlardır Miraç, Melisadan 240 km az araba sürmüştür. Masal Melisanın sürdüğü miktarın 9 katı kadar araba sürmüştür. Miraç 80 km araba sürdüyse toplam kaç km yol gitmişlerdir.	4	4	6	6
F37	drive	2	1	Rabia, Eylül, Feyza 240 gr çikolata almışlardır Rabia 60 gr yemiştir. Eylül Rabia'dan 2 kat daha fazla yediyse Feyza kaç gr çikolata yemiştir.	Rabia, Eylül, Feyza 240 gr çikolata almışlardır Rabia 60 gr yemiştir. Eylül Rabia'dan 2 kat daha fazla yediyse Feyza kaç gr çikolata yemiştir.	1	1	1	1
F37	drive	3	6	Ecenaz, Gamze ve Eslem birlikte aynı arabayla hafta sonu tatile için gidecekleri geriye dönüşümlü olarak arabayı kullanarak yolculuğu tamamlayacaklardır. Ecenaz Gamze'den 240 km az araba sürmüştür. Gamze, Eslem'in sürdüğü miktarın 9 katı kadar araba sürmüştür. Eslem 80 km araba sürdüyse toplam kaç km yol gitmişlerdir.	Ecenaz, Gamze ve Eslem birlikte aynı arabayla hafta sonu tatile için gidecekleri geriye dönüşümlü olarak arabayı kullanarak yolculuğu tamamlayacaklardır. Ecenaz Gamzeden 240 km az araba sürmüştür. Gamze, Eslem'in sürdüğü miktarın 9 katı kadar araba sürmüştür. Eslem 80 km araba sürdüyse toplam kaç km gitmişlerdir.	6	6	6	6
F37	cake	1	6	Bir kek 8 esit parçaya ayrılmıştır Aişe 2/8'ini Beren 4/8'ünü ve Alya ise 2/8'ini yemiştir. Buna göre kekin kaçta kaçını yemişlerdir.	Bir kek 8 esit parçaya ayrılmıştır Aişe 2/8'ini Beren 4/8'ünü ve Alya ise 2/8'ini yemiştir. Buna göre kekin kaçta kaçını yemişlerdir.	6	6	6	6
F37	cake	2	6	Bir kek 18 'eşit paraya ayrılmıştır. Ali 3/8'ini Fatma, 2/8'ana, Asya ise 2/8'ini yemiştir. Buna göre Merveje kekir kaçta kaçı kalmıştır.	Bir kek 8 eşit parçaya ayrılmıştır. Ali 1/8'ini, Fatma, 3/8'ini, Asya ise 2/8'ini yemiştir. Buna göre Merveye kekin kaçta kaçı kalmıştır.	6	6	6	6
F37	cake	3	5	Bir pizza 8 es parça ayrılmıştır. Ahmet 1/4'ini, Irmak 4/8'ünü yemişter, Pizzadan 7/8 dilim arttığına göre Rümeysa kaa dilim yemiştir...	Bir pizza 8 eş parça ayrılmıştır. Ahmet 1/8'ini, Irmak 4/8'ünü yemiştir. Pizzadan iki dilim arttığına göre Rümeysa kaç dilim yemiştir.	4	4	6	6
F38	drive	1	6	Mert kaç km araba sürmüştür?	Mert kaç km araba sürmüştür	6	6	6	6
F38	drive	2	6	Ali merte oranla ne kadar sürmüştür?	Ali merte oranla ne kadar sürmüştür	6	6	6	6
F38	drive	3	6	araba 20 km'de 1 litre benzin harcıyorsa Hasan kaç litre benzin harcamıştır?	araba 20 kmde 1 litre benzin harcıyorsa Hasan kaç litre benzin harcamıştır	6	6	6	6
F38	cake	1	6	Bir Kek 8 eşit parçaya ayrılmıştır. Elif kekin 4/8’ini, Mert 2/8’ini ve Kübra ise 2/8’ini yemiştir. Kekin 5 Kaloridir. Buna göre Kübranın aldığı kalorinin Elife göre oranı kaçtır?	Bir Kek 8 eşit parçaya ayrılmıştır. Elif kekin 4/8’ini, Mert 2/8’ini ve Kübra ise 2/8’ini yemiştir. Kekin 1/8 20 kaloridir. Buna göre Kübranın aldığı kalorinin elife göre oranı kaçtır?	6	6	6	6
F38	cake	2	6	Mert ile Elife oranla ne kadar kek yemiştir?	Mert elife oranla ne kadar kek yemiştir?	6	6	6	6
F38	cake	3	6	Elif kekin 100 de kolini yemistir	Elif kekin 100 de kaçını yemistir	2	6	6	6
F39	drive	1	4	Etkinlik 2 nin devamında Hasanla Mertin toplam sürdüğü km Alilden farkının toplam gidilen yala bölümü kaçtını	Etkinlik 2 nin devamında Hasanla Mertin toplam sürdüğü km Ali'den farkının toplam gidilen yola bölümü kaçtır?	6	6	6	6
F39	drive	2	4	Etkinlik Znin devamında Mert 30 km daha surseydi Aliden farkı * fir. x'in Hasan ile Alinin toplamı x'e bölündüğünde kaççıban)	Etkinlik 2nin devamında Mert 30 km daha az surseydi Aliden farkı x tir. x'in Hasan ile Alinin toplamı x'e bölündüğünde kaç çıkar?	6	6	6	6
F39	drive	3	6	Etkinlik Znin devamında Hasan 10 dk başı 40 km, Ali ise 70dk, başı 20km sürüyorsa Ali'ite Hasanın toplam gittiği yolu kaç saniyede gitmişlerdir?	Etkinlik 2nin devamında Hasan 10 dk başı 40 km, Ali ise 10 dk başı 20 km sürüyorsa Ali ile Hasanın toplam gittiği yolu kaç saniyede gitmişlerdir?	6	6	6	6
F39	cake	1	4	Bir kek 8 eşit parçaya ayrılmıştır. Elif kekin 4/8'ini, Mert 1/8'ini ve Kübra ise 2/8'ini yemiştir. Elif ve Kübranın yediği dilim sayısının 2 katı Mert ve Kübranın dilim sayısından farkları nedir?	Bir kek 8 eşit parçaya ayrılmıştır. Elif kekin 4/8'ini, Mert 2/8'ini ve Kübra ise 2/8'ini yemiştir. Elif ve Kübranın yediği dilim sayısının 2 katı Mert ve Kübra'nın dilim sayısından farkları nedir?	6	6	6	6
F39	cake	2	4	Bir kek 8 eşit parçaya ayrılmıştır. Elif kekin 4/8'ini, Mert 1/8'ini ve Kübra ise 2/8'ini yemiştir. Mert 2 dilim daha fazla yeseydi Kübranın yediği dilim sayısının 3 katından çıkınca X sayısı ortaya çıkardı. Buna göre (X^4) kaçtır?	Bir kek 8 eşit parçaya ayrılmıştır. Elif kekin 4/8'ini, Mert 2/8'ini ve Kübra ise 2/8'ini yemiştir. Mert 2 dilim daha fazla yeseydi Kübranın yediği dilim sayısının 3 katından çıkınca X sayısı ortaya çıkardı. Buna göre (X^4) kaçtır?	4	6	4	6
F39	cake	3	4	Bir kek 8 eşit parçaya ayrılmıştır. Elif kekin 4/8'ini, Mert 1/8'ini ve Kübra ise 3/8'ini yemiştir. Kekin 7/4 diliminde 8 yumurta kullanılmıştır. Elif 3 yumurta içeren dilimini yeseydi Kübranın yediği dilim sayısından kaç fazladır?	Bir kek 8 eşit parçaya ayrılmıştır. Elif kekin 4/8'ini, Mert 1/8'ini ve Kübra ise 3/8'ini yemiştir. Kekin 3/4 diliminde 8 yumurta kullanılmıştır. Elif 3 yumurta içeren dilimini yeseydi Kübra'nın yediği dilim sayısından kaç fazladır?	4	4	4	4
F4	drive	1	6	Buna göre Mert kaç km araba sürmüştür?	Buna göre Mert kaç km araba sürmüştür?	6	6	6	6
F4	drive	2	6	Buna göre Ali'nin sürdüğü mileler ile Mert ve Hasanın sürdüklero mesafenen farla baştır?	Buna göre Ali'nin sürdüğü miktar ile Mert ve Hasanın sürdükleri mesafenin farkı kaçtır?	6	6	6	6
F4	drive	3	6	Buna göre Hasan Alo'den kaç km fazla araba sürmastur	Buna göre Hasan Ali'den kaç km fazla araba sürmüştür?	6	6	6	6
F4	cake	1	6	Buna göre Kübra'nın yediği kekin diğerlerinin yediği keke oranı nedir?	Buna göre Kübra'nın yediği kekin diğerlerinin yediği keke oranı nedir?	6	6	6	6
F4	cake	2	4	Buna göre Elif'in yediği kekin ondalık gösterimi nedir?	Buna göre Elif'in yediği kekin ondalık gösterimi nedir?	6	6	6	6
F4	cake	3	6	Buna göre en fazla ile en az kek yiyenlerin farkı kaçtır?	Buna göre en fazla ile en az kek yiyenlerin farkı kaçtır?	6	6	6	6
F40	drive	1	6	Buna göre Hasan kaç km araba sürmüştür	Buna göre Hasan kaç km araba sürmüştür	6	6	6	6
F40	drive	2	6	Toplam kaç km yol gidilmiştir	Toplam kaç km yol gidilmiştir.	6	6	6	6
F40	drive	3	6	Bu km'renin 3 katı daha böyle yol gitmişlerdir. Buna göre kaç km yol gidilmiştir	Bu km'nin 3 katı daha böyle yol gitmişlerdir. Buna göre kaç km yol gidilmiştir	6	6	5	5
F40	cake	1	3	Buna göre her parçası 6 gr olduğuna göre kekin her bir parçası kaç gr'dır?	Buna göre her parçası 6 gr olduğuna göre kekin her bir parçası kaç gr'dır?	3	3	3	3
F40	cake	2	6	60 kalorili bu kekte 8 parça vardır. Buna göre hangi kişi daha çok kilo alıp dombili olmuştur?	560 kalorili bu kekde 8 parça vardır. Buna göre hangi kişi daha çok kilo alıp dombili olmuştur.	3	3	3	3
F40	cake	3	1	Bu kekin her bir parçası 2 Newton'dur. Elif kekini Everest dağında yemiştir. ve ağırlığı azalmıştır. Mert kekini denie seviyesinde yemiştir. Kübra kekini yer altında kömür maden yemiştir. Buna göre hangisi daha ağırdır	Bu kekin her bir parçası 2 Newton'dur. Elif kekini Everest dağında yemiştir ve ağırlığı azalmıştır. Mert kekini deniz seviyesinde yemiştir. Kübra kekini yer altında kömür madeninde yemiştir. Buna göre hangisi daha ağırdır	3	3	3	4
F41	drive	1	4	Mert midesi balandığı için sürdüğü km miktarının yarısını sürmesi için Hasana çeyreğini ise Aliye vermiştir. Hasanın sürdüğü Kn Ali'ninkinden ne kadar fazladır.	Mert midesi bulandığı için sürdüğü km miktarının yarısını sürmesi için Hasana çeyreğini ise Aliye vermiştir. Hasan'ın sürdüğü km Alininkinden ne kadar fazladır.	6	6	6	6
F41	drive	2	4	Yolun yarısında Mert sürme işlerini tamamladı Hasanda yarısını tamamladı. Tam orada yanlarına Caneri aldılar hasan yorulduğu lain kendi sürme işlerini Canere verdi Alide kendi sürüşünü Canere Verdi Caner ne kadar yol sürdü	Yolun yarısında Mert sürme işlerini tamamladı Hasanda yarısını tamamladı. Tam orada yanlarına Caneri aldılar hasan yorulduğu için kendi sürme işlerini Canere verdi Alide kendi sürüşünü Canere Verdi Caner ne kadar yol sürdü	4	4	4	4
F41	drive	3	4	Alan 20 km'yi 10 dakkada gidiyodur. Bu arkadaşların toplam gittigi yolun yarısından Mertin gittiği yolu çıkardığınızda Kalan yolu ne kadar dakkada gideriz.	Araç 20 km'yi 10 dakkada gidiyodur. Bu arkadaşların toplam gittigi yolun yarısından Mert'in gittiği yolu çıkardığınızda Kalan yolu ne kadar dakkada gideriz.	6	6	6	6
F41	cake	1	4	Problem 1: Fakat Elif kekinin çeyreğini yiyerertistic. Pedi Elifin yemediği kek olmadan Tümarkadaşlar kekin kaçta kaçını yemiştir?	Fakat Elif kekinin çeyreğini yiyememiştir. Peki Elifin yemediği kek olmadan Tüm arkadaşlar kekin kaçta kaçını yemiştir?	4	4	6	6
F41	cake	2	6	Problem 2: Somasında o kekin yarısı kadar bis kek daha aldılar. Elif ¿'ni Mest' 2'sini Kübrada ni yemiştir. Kübra önceki ve şimdiki kekten toplam ne kadar yemistic?	Sonrasında o kekin yarısı kadar bir kek daha aldılar. Elif 1/4'ni Mert 2/4'sini Kübrada 1/4'ni yemiştir. Kübra önceki ve şimdiki kekten toplam ne kadar yemiştir?	5	5	6	6
F41	cake	3	4	Problem 3: Mer + kendi kekinin yarısını Elife verdi. Elifte kendi kekinin Gaycağini kübraya verdi. Kübrada tüm kekini Merte verdi Mertire ne Kadar keki raidis?	Mert kendi kekinin yarısını Elife verdi. Elifte kendi kekinin çeyreğini kübraya verdi. Kübrada tüm kekini Merte verdi Mertin ne Kadar keki vardır?	4	5	6	6
F42	drive	1	6	Bu bilgilere göre yol toplam kaç km'dir?	Bu bilgilere göre yol toplam kaç km'dir?	6	6	6	6
F42	drive	2	5	Ali 60 km araba sürdükten sonra yorulup Arabayı direkt Hasan'a teslim etseydi kaç km yolları kalmış olurdu	Ali 60 km araba sürdükten sonra yorulup Arabayı direkt Hasan'a teslim etseydi kaç km yolları kalmış olurdu	6	6	6	6
F42	drive	3	4	Bu arabanın gittiği 1 km 1 dk ya eşitse: Ali yorulup sadece 70 km sürmüştür buna göre balon yol kaç dk 'ya gidilir	Bu arabanın gittiği 1 km 1 dk ya eşitse: Ali yorulup sadece 70 km sürmüştür buna göre kalan yol kaç dk 'ya gidilir	4	4	4	4
F42	cake	1	4	Elif kendine aldığı kekin yarısını başka bir arkadaşına verdiğine göre Elif, Mert ve Kübra'nın yediği toplam kek sayısı kaçtır?	Elif kendine aldığı kekin yarısını başka bir arkadaşına verdiğine göre Elif, Mert ve Kübra'nın yediği toplam kek sayısı kaçtır?	6	6	6	6
F42	cake	2	6	Bu kek 16 eş parçaya bölünseydi Mert ve Kübra'nın yediği kek sayısının toplamından Elif'in yediği kek sayısını çıkarırsaydık kaç kalırdı	Bu kek 16 eş parçaya bölünseydi Mert ve Kübranın yediği kek sayısının toplamından Elif'in yediği kek sayısını çıkarırsaydık kaç kalırdı	6	6	6	6
F42	cake	3	4	8 parçalık bir kek 800 kalori ise. Elif'in yediği kekin Mert'in yediği keke bölünümünün toplam kalorisi kaçtır.	8 parçalık bir kek 800 kalori ise Elifin yediği kekin Mertin yediği keke bölünümünün toplam kalorisi kaçtır.	4	4	4	4
F43	drive	1	6	Buna göre Mert ve Hasan Ali'den kaç km daha fazla sürmüştür?	Buna göre Mert ve Hasan Aliden kaç km daha fazla sürmüştür?	6	6	6	6
F43	drive	2	6	Bu üç arkadaş toplamda kaç km araba sürmüştür?	Bu üç arkadaş toplamda kaç km araba sürmüştür?	6	6	6	6
F43	drive	3	6	Ali Mert'ten kaç km daha az sürmüştür?	Ali Mertten kaç km daha az sürmüştür?	6	6	6	6
F43	cake	1	6	Bu kek toplam 256 gram olduğuna göre Elif ve Kübra toplam kaç gram kek yemiştir?	Bu kek toplam 256 gram olduğuna göre Elif ve Kübra toplam kaç gram kek yemiştir?	6	6	6	6
F43	cake	2	6	Bu kekin bir dilimi 32 gram dir. Mert 15 dakikada aralık spor yaptığında 4 grom Lila veriyorsa aldığı bütün grom- lalı vermek için kaç dakika spor yopmalı?	Bu kekin bir dilimi 32 gram dir. Mert 15 dakikada aralıksız spor yaptığında 4 gram kilo veriyorsa aldığı bütün gramları vermek için kaç dakika spor yapmalı?	6	6	6	6
F43	cake	3	6	Mert ve Kübra kekin kaata loanı yemiştir.	Mert ve Kübra kekin kaçta kaçını yemiştir.	6	6	6	6
F44	drive	1	0			0	0	0	0
F44	drive	2	0			0	0	0	0
F44	drive	3	0			0	0	0	0
F44	cake	1	3	Elif, Mert ve Kübra sırasıyla 4/8, 2/8, 2/8'ini yemiştir. Her bir kek 8 eş parçaya ayrıldığına göre Mert kekin kaçta kaçını yemiştir?	Elif, Mert ve Kübra sırasıyla 4/8, 2/8, 2/8'ini yemiştir. Her bir kek 8 eş parçaya ayrıldığına göre Mert kekin kaçta kaçını yemiştir?	3	3	3	3
F44	cake	2	6	Üç arkadaş kekin sırasıyla, Elif 4/8'ini, Mert 2/8'ini Kübra ise 2/8'ini yemiştir. Üç arkadaşın kekleri 8 eşit parçaya ayrıldığına göre, Mert ve Kübra'nın yediği kek sayısının miktarı kaçtır? (Her kek 8 eş parçaya ayrılmıştır.)	Üç arkadaş kekin sırasıyla, Elif 4/8'ini, Mert 2/8'ini Kübra ise 2/8'ini yemiştir. Üç arkadaşın kekleri 8 eşit parçaya ayrıldığına göre, Mert ve Kübra'nın yediği kek sayısının miktarı kaçtır? (Her kek 8 eş parçaya ayrılmıştır.)	6	6	6	6
F44	cake	3	0			0	0	0	0
F45	drive	1	6	Problem 1:3 arkadaş haftu sonu talili için geziden geri döncekler di. Arabayı dönusumlu olarak kullanarak yolu tamamlamışlar. All 80 km araba surmüştür Hasan ise Alinin 9 katı fazla surmüşse Hasan kaç km sürmüştür?	3 arkadaş hafta sonu talili için geziden geri dönceklerdi. Arabayı dönüşümlü olarak kullanarak yolu tamamlamışlar. Ali 80 km araba surmüştür Hasan ise Alinin 9 katı fazla surmüşse Hasan kaç km sürmüştür?	6	6	6	6
F45	drive	2	6	Problem 2: Ali 80 km araba sürmüştür Hasan Aliden 9 katı daha fazla surrmüştür Mert ise Hasan'dan 240 km az Sürmüşse Mert ve Ali toplam kaç km sürmüş tür	Ali 80 km araba sürmüştür Hasan Aliden 9 katı daha fazla surrmüştür Mert ise Hasan'dan 240 km az Sürmüşse Mert ve Ali toplam kaç km sürmüştür	6	6	6	6
F45	drive	3	0			0	0	0	0
F45	cake	1	5	Kek 8 parçaya ayrılmış. Elif kekin yarısını, Mert 2/8'ini yemişse Kübra kaç parça yemiştir.	Kek 8 parçaya ayrılmış. Elif kekin yarısını, Mert 2/8'ini yemişse Kübra kaç parça yemiştir.	5	5	5	5
F45	cake	2	6	kek 8 parçadır. Elif X/8 kek yemiştir. Mert 2/8'ini kübrada 2/8'ini yediyse x kaçtır?	kek 8 parçadır. Elif X/8 kek yemiştir. Mert 2/8'ini kübrada 2/8'ini yediyse x kaçtır?	5	5	5	5
F45	cake	3	1	Bir kek dilimi başı 100 gramdır. Keki 8 parçaya ayrılmış. Elif 400 gramını yemişse ve Ali ile kübra kalan dilimleri bölüşceklerse Ali ve Kübra'ya kaç dilim kek düşer?	Bir kek dilimi başı 100 gramdır. Keki 8 parçaya ayrılmış. Elif 400 gramını yemişse ve Ali ile kübra kalan dilimleri bölüşceklerse Ali ve kübraya kaç dilim kek düşer?	6	6	6	6
F46	drive	1	4	Buna göre Mert'in akacak sonucu 3/8 ile çarpasak seikocok sarvoun 1/3 ile çarpımı kaçtır?	Buna göre Mert'in çıkacak sonucu 3/8 ile çarpasak çıkacak sonucun 1/3 ile çarpımı kaçtır?	6	6	6	6
F46	drive	2	5	Ali 80 değilde 90 km sürseydi Hasanın süreceği km sayısı, Eğer Hason 70km daha on sürseydı Mert'in süreceği kmin, ve Hason'ın km sinin toplamı kaçtır?	Ali 80 değilde 90 km sürseydi Hasan'ın süreceği km sayısı, Eğer Hasan 70km daha az sürseydı Mert'in süreceği km'in ve Hasan'ın km'sinin toplamı kaçtır?	4	4	5	6
F46	drive	3	0			0	0	0	0
F46	cake	1	4	Eğer Elif 1/8 değilde 2/8 olsaydı ilk çıkacak sonucla; 2/8 e dönüştüğü zaman çıkacak 2 sonucun toplamı kaçtır?	Eğer Elif 4/8 değilde 2/8 olsaydı ilk çıkacak sonuçla; 4/8, 2/8'e dönüştüğü zaman çıkacak 2 sonucun toplamı kaçtır?	4	4	5	5
F46	cake	2	6	Bu kek 400 gram olduğuna göre ve herkes payı kadar dilim yediğine göre her bir kişi sırasıyla kaç gram yemiştir?	Bu kek 400 gram olduğuna göre ve herkes payı kadar dilim yediğine göre her bir kişi sırasıyla kaç gram yemiştir?	6	6	6	6
F46	cake	3	0			0	0	0	0
F47	drive	1	6	Buna göre geri dönmek için kaç km yol gitmişlerdir?	Buna göre geri dönmek için kaç km yol gitmişlerdir?	6	6	6	6
F47	drive	2	6	Buna göre Hasan ve Merti toplam kaç km araba sürmüşlerdin	Buna göre Hasan ve Mert toplam kaç km araba sürmüşlerdir.	6	6	6	6
F47	drive	3	6	Buna göre en azdan en çoka doğru araba süren kişileri Sıralayınız.	Buna göre en azdan en çoka doğru araba süren kişileri Sıralayınız.	6	6	6	6
F47	cake	1	5	Kekin her diliminde diğerinden 2 kat fazla olucak şekilde meyve vardır. İlk dilimde 3 meyve olduğuna göre herkes kaç meyve yemiştir.	Kekin her diliminde diğerinden 2 kat fazla olucak şekilde meyve vardır. İlk dilimde 3 meyve olduğuna göre herkes kaç meyve yemiştir.	5	5	5	5
F47	cake	2	0			0	0	0	0
F47	cake	3	0			0	0	0	0
F48	drive	1	4	Problem 1: Hoson, Aliden 100 km' daha fazla oroboa Sernoster, Mert Hosan'dan 240 km o2 Buna göre Mert kas lam oroba sürrostun	Hasan, Aliden 100 km' daha fazla araba sürmüştür, Mert Hasan'dan 240 km az Buna göre Mert kaç km araba sürmüştür?	4	4	4	4
F48	drive	2	6	Problem 2: Ali ve Hasan his oraba sürmeseydi Mert las lam yol giderdi?	Ali ve Hasan hiç araba sürmeseydi Mert kaç km yol giderdi?	4	6	4	4
F48	drive	3	5	Problem 3: Mertve Ali süreceği yere ladar sürseyley's gidecekleri kas km'deri kalır?	Mert ve Ali süreceği yere lkadar sürseymiş gidecekleri kaç km'leri kalır?	5	5	5	5
F48	cake	1	5	Problem 1: Kübranın doğum günene, Mert ve Elif gelmistir Mert kekin 2/8 sini, Elif'i 4/8 sini yemistis kübra kas dilin kek yeristis?	Kübranın doğum günene, Mert ve Elif gelmistir Mert kekin 2/8'sini, Elif 4/8'sini yemistir kübra kaç dilim kek yemiştir?	6	6	5	5
F48	cake	2	6	Problem 2: Lek 8 esit Porso yerine 6 porsayo ayrılsaydı kişi bosna ne kadar kiek düser?	Kek 8 esit parça yerine 6 parçaya ayrılsaydı kişi başına ne kadar kek düşer?	6	6	6	6
F48	cake	3	6	Problem 3: Elf, Mert, Kübra us farklı kek yemistiro Beton kekler 8 Porsayo ayrılmıştır, Elif sikolotol 4/8, Mert muzlu 2/8, Kübra silekli 2/8. Silekli kek 600 kalori, sikalatoul kek 800 kalori, muzlu kek 1000 kaloridir. Buna göre Elif, mert ve Kübranın aldığı kalorilerin toplame kastir?	Elif, Mert, Kübra üç farklı kek yemistir. Bütün kekler 8 parçaya ayrılmıştır. Elif çikolatalı 4/8, Mert muzlu 2/8, Kübra çilekli 2/8 çilekli kek 600 kalori, çikolatalı kek 800 kalori, muzlu kek 1000 kaloridir. Buna göre Elif, mert ve kübranın aldığı kalorilerin toplamı kaçtır?	6	6	6	6
F49	drive	1	3	Ali, Hasan, Mert Sırasıyla araba sürüyorlar ama Mert Hasan'dan 240 km az araba sürmüştür, Hasan, Ali'nin sürdüğü miktarın 9 katı kadır araba sürmüştür. Ali 80 km sürdü ama araba 80km birde duruyor buna göre araba Yedinci duruşunda kaç kere durdu	Ali, Hasan, Mert sırasıyla araba sürüyorlar ama Mert Hasandan 240 km az araba sürmüştür, Hasan, Alinin sürdüğü miktarın 9 katı kadar araba sürüy Ali 80 km sürdü ama araba 80 km birde duruyor buna göre araba Yedinci duruşunda kaç kere durdu	4	4	3	4
F49	drive	2	6	Üç Arkadaş AGbayı sırayla sürü yorlardı mert Hasanden 240 km az Sürmuftur Halonise Alinin 9 katı Sürdü. Ali 80km Surd bana söre Hosanta meritin toplamy Alinin bap batıdır?	Üç Arkadaş Arabayı sırayla sürüyorlardı mert Hasandan 240 km az sürmüştür Hasan ise Alinin 9 katı sürdü. Ali 80km sürdü buna göre Hasanla Mertin toplamı Alinin kaç katıdır?	6	6	6	6
F49	drive	3	0			0	0	0	0
F49	cake	1	4	Elif uzun ve kısa kenarı 24cm olan keki 8 eş parçaya böldü ve Elif 4/8, Mert 2/8 ini Kübra yedi. buna göre Elif kaç santim kek yedi.	Elif uzun ve kısa kenarı 24cm olan keki 8 eş parçaya böldü ve 4/8 Elif, 2/8 Mert 2/8sini Kübra yedi. buna göre Elif kaç santim kek yedi	4	4	4	4
F49	cake	2	6	Bir kek 8 eşit parçaya ayrılmıştır Elif kekin 4/8 ünü mert 2/8 kübra ise 2/8 yedi bir parça kek 231 gramdır buna göre bütün kek kaç gram dır?	Bir kek 8 eşit parçaya ayrılmıştır Elif kekin 4/8 ünü mert 2/8 kübra ise 2/8 yedi bir parça kek 231 gramdır buna göre bütün kek kaç gram dır?	6	6	6	6
F49	cake	3	6	Bir kek 8 eşit parçaya ayrılmıştır mert le kübra aynı dilim kek yedi Elif mertin 2 katını Yenis, mertle kübranın toplamı Elife eşitti buna göre Elif ne kadar kek Yedi	Bir kek 8 eşit parçaya ayrılmıştır mert'le kübra aynı dilim kek yedi Elif mertin 2 katını yemiş, mertle kübranın toplamı Elife eşitti buna göre Elif ne kadar kek yedi	6	6	6	5
F5	drive	1	6	Mert, Hasan'dan 240 km az, Hasan ile Ali'den 9 kat daha fazla araba sürdüyse, Hasan kaç km araba sürmüştür.?	Mert, Hasan'dan 240 km az, Hasan ise Ali'den 9 kat daha fazla araba sürdüyse, Hasan kaç km araba sürmüştür.?	4	4	6	6
F5	drive	2	6	Verilen bu bilgiye göre, geri dönüş yolu kaç km'dir?	Verilen bu bilgiye göre, geri dönüş yolu kaç km'dir?	6	6	6	6
F5	drive	3	6	Verilen bu bilgiye göre, Hasanın sürdüğü km sayısının, Mert ve Ali'nin sürdüğü km sayısına oranı kaçtır?	Verilen bu bilgiye göre, Hasan'ın sürdüğü km sayısının, Mert ve Ali'nin sürdüğü km sayısına oranı kaçtır?	6	6	6	6
F5	cake	1	6	8 parçaya ayrılan bir kekin 4/8'ini Elif, 2/8'ini Mert, 1/8'ini Kübra yediyse, Elif kaç parça kek yemiştir?	8 parçaya ayrılan bir kekin 4/8'ini Elif, 2/8'ini Mert, 2/8'ini Kübra yediyse, Elif kaç parça kek yemiştir?	6	6	6	6
F5	cake	2	6	8 parçaya ayrılan bir kekin 4/8'ini Elif, 2/8'ini Mert, 1/8'ini Kübra yediyse, Kübra, Eliften kaç parça daha az yemiştir?	8 parçaya ayrılan bir kekin 4/8'ini Elif, 2/8'ini Mert, 2/8'ini Kübra yediyse, Kübra, Eliften kaç parça daha az yemiştir?	6	6	6	6
F5	cake	3	6	Bir kek 8 parçaya ayrılmıştır. Elif bu kekin 4/8'ini yemiştir. Kübra ve Mert'in yediği parça sayısının toplamı bu kekin 4/8'i ise, Mert kekten 1 dilim yemese, o kekten Kübra yese, kübra kaç parça kek yemiş olur?	Bir kek 8 parçaya ayrılmıştır. Elif bu kekin 4/8'ini yemiştir. Kübra ve Mert'in yediği parça sayısının toplamı bu kekin 4/8'i ise, Mert kekten 1 dilim yemese, o keki Kübra yese, kübra kaç parça kek yemiş olur?	6	6	5	6
F50	drive	1	4	Problem 1: Herkes arbayı Sürmüştür Hosonda=500km sürmüştür Ali yolu hızı bitirmek istemiştir o yüzden Hosen normalden gititig. Süratın yarısı koder doha hızlı gitmiştir Hosen ise korktuğu için normal gideceği yolun yarısı kadar yavaş gitmiştir. Diğerler: normal hızda gittiğine göre yolu ne kadon Sürede bitirmiştir. (1km = 10dk) = yola çıkarkenk. Soot 07.00dir.	Herkes arbayı Sürmüştür Hasanda=500km sürmüştür Ali yolu hızı bitirmek istemiştir o yüzden Hasan normalden gittiği süratın yarısı kadar daha hızlı gitmiştir Hasan ise korktuğu için normal gideceği yolun yarısı kadar yavaş gitmiştir. Diğerleri normal hızda gittiğine göre yolu ne kadar sürede bitirmiştir. (1km = 10dk) = yola çıkarkenki saat 07.00dir.	4	4	4	4
F50	drive	2	4	Problem 2: Hason 500km sürdüğine göre işlem yapılacaktır. ve 1km=10dk dit Yolun yarısında 30 dk mala verilmiştir buna göre yolu kog Scotte bitirilmiştir	Hasan 500km sürdüğine göre işlem yapılacaktır ve 1km=10dk'dir Yolun yarısında 30 dk mola verilmiştir buna göre yolu kaç saatte bitirilmiştir	4	6	4	6
F50	drive	3	4	Problem 3: Hosen 500km Sürmüştün 1km = todk 'dır. Mert heyecandon Kozo yapmıştır o yüzden hostaneye gitmişledir ve uroda 1 Soot durmuşlardın yola Mertsiz gitmişlerdir Kou Sootte bite	Hasan 500km sürmüştür 1km = 10dk 'dır. Mert heyecandan Kaza yapmıştır o yüzden hastaneye gitmişledir ve oroda 1 saat durmuşlardır yola Mertsiz gitmişlerdir Kaç saatte biter.	5	5	5	5
F50	cake	1	6	Buna göre en çok kim yemiştir çoktan aza doğru Sıralayınız	Buna göre en çok kim yemiştir çoktan aza doğru Sıralayınız	6	6	6	6
F50	cake	2	6	Elif ve Kübranın toplam yediği kek Mert'in yediği kekin Koasta Koçi Kadardır.	Elif ve Kübra'nın toplam yediği kek Mert'in yediği kekin kaçta kaçı kadardır.	6	6	6	6
F50	cake	3	6	Elif Kekinin yarısını yiyememiştir Kaonin. ise yrısını Mente diğer yarışını Kübraye vermiştit mert ise Kordeşiyle Paylaşıre 7'ünü Kardeşine verir buna göre mertin Kardeşi kebin tamamının kaçta kaçını yemiştir.	Elif Kekinin yarısını yiyememiştir Kekinin ise yarısını Merte diğer yarısını Kübraya vermiştir mert ise Kardeşiyle paylaşıp 1/4'ünü kardeşine verir buna göre mertin kardeşi kekin tamamının kaçta kaçını yemiştir.	4	6	6	6
F6	drive	1	6	Yukarıdaki metne göre Mert kaç km araba sürmüştür?	Yukarıdaki metne göre Mert kaç km araba sürmüştür?	6	6	6	6
F6	drive	2	6	Döndükleri yol gittikleri yolla aynı olduğuna göre gidiş-dönüşte toplam kaç km yol gitmişlerdir?	Döndükleri yol gittikleri yolla aynı olduğuna göre gidiş-dönüşte toplam kaç km yol gitmişlerdir?	6	6	6	6
F6	drive	3	6	Yukarıdaki metne göre Ali ve Mert'in toplam araba sürdüğü km sayısı Hasan'ın araba sürdüğü km sayısından ne kadar azdır.	Yukarıdaki metne göre Ali ve Mert'in toplam araba sürdüğü km sayısı Hasan'ın araba sürdüğü km sayısından ne kadar azdır.	6	6	6	6
F6	cake	1	6	Problem 1Özder 2. kekte, kekler aynı şekilde paylaşılmış ancak Elif 2/32 sini, Mert 1/8 ini, Kübra ise hi. yiyememiştir. Buna göre kalan kek miktarı kaçits?	Özdeş 2. kekte, kekler aynı şekilde paylaşılmış ancak Elif 12/32'sini, Mert 1/8'ini, Kübra ise hiç yiyememiştir. Buna göre kalan kek miktarı kaçtır?	6	6	6	6
F6	cake	2	6	Problem 2: Elif 'in yediği miktarla Mert'in yediği miktor toplamı Kübranın yediği miktardan ne kaden fazladır?	Elif 'in yediği miktarla Mert'in yediği miktar toplamı Kübra'nın yediği miktardan ne kadar fazladır?	6	6	6	6
F6	cake	3	4	Problem 3: Mert'in yediği kekin 3/4'ü ile Kübra nın yediği kek miktarın 3/8'inin toplamı kaçtır?	Problem 3: Mert'in yediği kekin 3/4'ü ile Kübra'nın yediği kek miktarın 3/8'inin toplamı kaçtır?	6	6	6	6
F7	drive	1	6	Buna göre Mert kan km araba sürmester?	Buna göre Mert kaç km araba sürmüştür?	6	6	6	6
F7	drive	2	6	Toplam kan km yol gidilmiştir?	Toplam kaç km yol gidilmiştir?	6	6	6	6
F7	drive	3	6	Mert ve Ali 'nin toplam sürdükleri yol kan km'dir?	Mert ve Ali 'nin toplam sürdükleri yol kaç km'dir?	6	6	6	6
F7	cake	1	6	Buna göre Elif, Mert'ten kaç kat fazla dilim kek yemiştir?	Buna göre Elif, Mert'ten kaç kat fazla dilim kek yemiştir?	6	6	6	6
F7	cake	2	6	Mert'in yediği dilim sayısı, Elif ve Kübra'nın toplam yedikleri dilim sayısından kaç kat azdır?	Mert'in yediği dilim sayısı, Elif ve Kübra'nın toplam yedikleri dilim sayısından kaç kat azdır?	6	6	6	6
F7	cake	3	5	8 eşit Parçaya ayrılan kekten Elif 4/8'ini, Mert ise 2/8 kadarını yiyor. Buna göre Kübra kekin kaçta kaçını yemiştir?	8 eşit Parçaya ayrılan kekten Elif 4/8'ini, Mert ise 2/8 kadarını yiyor. Buna göre Kübra kekin kaçta kaçını yemiştir?	5	5	5	5
F8	drive	1	6	Bu 3 kişiden hangisi daha fazla araba sürmüştür?	Bu 3 kişiden hangisi daha fazla araba sürmüştür.	6	6	6	6
F8	drive	2	6	Bu yolculukta toplam kaç km araba sürülmüştür?	Bu yolculukta toplam kaç km araba sürülmüştür.	6	6	6	6
F8	drive	3	6	Mert toplam kaç km araba sürmüştür?	Mert toplam kaç km araba sürmüştür.	6	6	6	6
F8	cake	1	6	Elif'in yediği kek sayısı ile Mert'in yediği kek sayısına oranı kaçtır?	Elif'in yediği kek sayısının Mertin yediği kek sayısına oranı kaçtır.	6	6	6	6
F8	cake	2	6	Elif'in yediği kek ile Mert'in yediği kek toplamının Kübra'nın yediği kek sayısına oranı kaçtır?	Elif'in yediği kek ile Mert'in yediği kekin toplamının Kübra'nın yediği kek sayısına oranına kaçtır.	6	6	6	6
F8	cake	3	6	Mert'in yediği kek sayısının Kübra'nın yediği kek sayısına oranı kaçtır?	Mert'in yediği kek sayısının Kübra'nın yediği kek sayısına oranı kaçtır.	6	6	6	6
F9	drive	1	6	Metindeki Bilgilee göre meat 1209 surmust bilometre Araba kullanmışt	Metindeki bilgilere göre Mert kaç km araba kullanmıştır	2	2	6	6
F9	drive	2	6	Üç or badaşın todilergitmek için dönüşümlü los kilometre robo kullanmışladı	Üç arkadaşın tatile gitmek için dönüşümlü kaç kilometre araba kullanmışlardır	2	6	6	6
F9	drive	3	6	Met hosend 240 kilometre of Sürmüştür ouria hosen Alinin 9 kati lader sürmiştir 41 80 km Drabu Sürdiğine göre hason ne bdr oroba sürmüşda	Mert Hasandan 240 km az sürmüştür ayrıca Hasan Alinin 9 katı kadar sürmüştür Ali 80 km araba sürdiğine göre Hasan ne kadar araba sürmüştür	6	6	6	6
F9	cake	1	6	Bir kek 8 eşit parçaya ayrılmış Elif 4/8 Met ise 2/8 yediğine göre bu kekin tamam bitmesi için Kübranın ne kadar kek yemesi lazım	Bir kek 8 eşit parçaya ayrılmış Elif 4/8 Met ise 2/8 yediğine göre bu kekin tamam bitmesi için Kübranın ne kadar kek yemesi lazım	6	6	6	6
F9	cake	2	6	Metindeki bilgilere göre elifin yediği kek sayısını kübraın yediği kek sayısına oranı kaçtr	Metindeki bilgilere göre elifin yediği kek sayısını kübranın yediği kek sayısına oranı kaçtr	6	6	6	6
F9	cake	3	6	Elif ve metin yediği toplem keket sayısı kübranın yediği kek sayısına oranı kaçtr	Elif ve mertin yediği toplam kek sayısının kübranın yediği kek sayısına oranı kaçtır	6	6	6	6
G1	drive	1	6	Ali, Hasan yolu ne kadar zamanda alıyorsa, Hasan 10km yolu 7 dakikada alıyorsa, Mert 10km'yi 8 dakikada alıyorsa toplam yolculuk kaç saat sürmüştür?	Ali 10 km yolu 10 dk'da alıyosa, hasan 10 km yolu 12 dk'da alıyosa, Mert 10km yi 8 dk'da alıyosa toplam yolculuk kaç dk sürmüştür	5	5	6	6
G1	drive	2	6	2 L+ benzinle 70 km gidiyorsa toplam yolculuk boyunca kaç L+ benzin harcamıştır?	2 Lt benzinle 10 km gidiyorsa toplam yolculuk boyunca kaç Lt yol almıştır	6	6	6	6
G1	drive	3	5	Jotun tüneline gelince arabayı mı kullanalım	Yolun 1/4'ine gelince arabayı kim kullanır	1	1	5	5
G1	cake	1	6	Elif kekin 3/8'ine 24 TL verdiğine göre mertle kübranın ödediği ücret toplam kas te dir?	Elif kekin 4/8'ine 24 TL verdiğine göre mert'le kübranın ödediği ücret toplam kaç tl'dir?	6	6	6	6
G1	cake	2	5	mer ile doğmanis ter ve üç ortakoak birkek dand sögre mislerdir mert buseferde yed's Fine göre ve elif tokoldugu iç Semediğine göre kübra keun kasta kaçını gemister?	mert 2/8 ile doymamış ve üç ortak olarak bir kek daha söylemişlerdir mert bu seferde 2/8 yediğine göre ve elif tok olduğu için yemediğine göre kübra kekin kaçta kaçını yemiştir?	5	5	5	5
G1	cake	3	4	Bir kek toplam 48 TL olduğuna göre Elif, mert ve kübranın dilimlerinin Scrasıyla çarpımah didim başına deşen fiyatla çarpay LISTE?	Bir kek toplam 48 TL olduğuna göre Elif, mert ve kübranın dilimlerinin sırasıyla çarpımının dilim başına düşen fiyatla çarpımı kaçtır?	6	6	4	4
G10	drive	1	6	Hasan kaç km sürmüştür?	Hasan kaç km sürmüştür	6	6	6	6
G10	drive	2	6	Mert kaç km sürmüştür?	Mert kaç km sürmüştür	6	6	6	6
G10	drive	3	6	Yolun toplam uzunluğu ne kadardır?	Yolun toplam uzunluğu ne kadardır	6	6	6	6
G10	cake	1	6	Buna göre bunları büyükten küçüğe sıralayınız	Buna göre bunları büyükten küçüğe sıralayınız	6	6	6	6
G10	cake	2	2	Buna göre en çok kim yemiştir	Buna göre en çok kim yemiştir	6	6	6	6
G10	cake	3	2	Buna göre en az kim yemiştir	Buna göre en az kim yemiştir	6	6	6	6
G11	drive	1	6	Buna göre hafta sonu tatiline giderken aynı km araba süre 3 arkadaştan Mert kaç km sürmüştür?	Buna göre hafta sonu tatiline giderken aynı km araba süren 3 arkadaştan Mert kaç km sürmüştür?	4	4	4	4
G11	drive	2	4	Buna göre eşyalarını unuttuğu için yarı yoldan dönen arkadaşlardan Hasan kaç km gitmiştir?	Buna göre eşyalarını unuttuğu için yarı yoldan dönen 3 arkadaştan Hasan kaç km gitmiştir.	5	4	5	5
G11	drive	3	6	Buna göre Sırasıyla Ali, Hasan, Mert şeklinde arabayı sürdüklerine göre yolun 3/4'ünde arabayı kim sürüyordur.	Buna göre Sırasıyla Ali, Hasan, Mert şeklinde arabayı sürdüklerine göre yolun 3/4'ünde arabayı kim sürüyordur.	6	6	6	6
G11	cake	1	6	Bir kek 8 eşit parçaya ayrılmıştır. Elif kekin 1/8'ini, Mert 2/8'ini ve Kübra ise 2/8'ini yemiştir. Buna göre 3 kek paylaştırılsaydı Elif ve Kübra'nın yediği keklerin tümü kaçtıra?	Bir kek 8 eşit parçaya ayrılmıştır. Elif kekin 4/8'ini, Mert 2/8'ini ve Kübra ise 2/8'ini yemiştir. Buna göre 3 kek paylaştırılsaydı Elif ve Kübra'nın yediği keklerin tümü kaçtır?	5	6	5	6
G11	cake	2	4	Bir kek 8 eşit parçaya ayrılmıştır, Elif kekin 1/8'ini, Mert 2/8'ini ve Kübra ise 2/8'ini yemiştir. Buna göre 6 kek olsaydı Elif ve Mert'in yedikleri kekin ortalaması kaçtı?	Bir kek 8 eşit parçaya ayrılmıştır. Elif kekin 4/8'ini, Mert 2/8'ini ve Kübra ise 2/8'ini yemiştir. Buna göre 6 kek olsaydı Elif ve Mertin yedikleri kekin ortalaması kaçtır?	6	6	6	6
G11	cake	3	6	bir kek 8 eşit parçaya ayrılmıştır Elif kekin 1/8'ini, Mert 2/8'ini ve Kübra ise 2/8'ini yemiştir. Buna göre 5 tane kek olsaydı Mert'in yediği dilim kaçtır?	Bir kek 8 eşit parçaya ayrılmıştır. Elif kekin 4/8'ünü, Mert 2/8'ini ve Kübra ise 2/8'ini yemiştir. Buna göre 5 tane kek olsaydı, Mert'in yediği dilim kaçtır.	6	6	6	6
G12	drive	1	4	Buna göre Hasanın sürdüğü km kadar Mert'in sürdüğü km kadar olan yol 1000km/lit yolun kaçta kaçıdır.	Buna göre Hasanın sürdüğü km kadar Mert'in sürdüğü km kadar olan yol 1000km lik yolun kaçta kaçıdır.	4	4	6	6
G12	drive	2	6	(Not = 10 km Ilitre benzin) Buna göre Mert arabaya Glitre fazla benzin koyersa Hasenın yolunur kaç ta kaçının benzin parasını ödemiş olur.	(Not = 10 km 1litre benzin) Buna göre Mert arabaya 5 litre fazla benzin koyarsa Hasanın yolunun kaçta kaçının benzin parasını ödemiş olur.	6	6	6	6
G12	drive	3	4	Daha sonra Volda mert uyaya kaldığı için Hasan ve Ali Mertin yolunu yori yaliya Sürmine ve buna göre Hasen toplom kas km yol sürmüştür.	Daha sonra yolda mert uyaya kaldığı için Hasan ve Ali Mertin yolunu yarı yarıya sürmüş ve buna göre Hasan toplam kaç km yol sürmüştür.	6	6	6	6
G12	cake	1	6	Elif'in annesi Elif arkadaşlarını doğumgününde yemeleri için kek yapmıştır ama kaç arkadaş geleceklerini bilmediği için keki 8 parçaya böldü Elif kekin 2/8'ini Mert 3/8'ini Kübra ise 1/8'ini yemiştir buna göre en az kek yiyen iki kişi kekin kaç parçasını yemişlerdir.	Elif'in annesi Elif arkadaşlarını doğumgününde yemeleri için kek yapmıştır ama kaç arkadaş geleceklerini bilmediği için keki 8 parçaya böldü Elif kekin 1/2'ini Mert 1/4'ini Kübra ise 1/4'ini yemiştir buna göre en az kek yiyen iki kişi kekin kaç parçasını yemişlerdir.	6	6	6	6
G12	cake	2	6	Mert marketten bir kek almıştır. Eve doğru giderken tam yemişlerdir. Keki açacakken arkadaşı Elif ve Kübra'yı görür ve ayıp olmasın diye onlara da verir. Kekin Elif, Mert, Kübra yemiş. Kekin 2 parçası 3+1 olduğuna göre Elif ve Kübra kekin kaç 1/8'lik payını yemiştir?	Mert marketten bir kek almıştır. Eve doğru giderken tam keki açacakken arkadaşı Elif ve kübrayı görür ve ayıp olmasın diye onlarada verir. Kekin 4/8 elif, 2/8 mert, 2/8 kübra yemiş. Kekin 1 parçası 3 tl olduna göre Elif ve kübra kekin kaç tl'lik payını yemiştir.	4	4	6	6
G12	cake	3	6	Buna göre 1 kek dilimi 191 kaloriye eşit olduğuna göre Elif akşam 41 kalorilik spor yapma buna göre Elif kaç kalori almıştır.	Buna göre 1 kek dilimi 191 kaloriye eşit olduğuna göre Elif akşam 41 kalorilik spor yapmış buna göre Elif kaç kalori almıştır.	6	6	6	6
G13	drive	1	6	Buna göre Mert ne hay km. araba sürmüştür.	Buna göre Mert ne kaç km araba sürmüştür.	6	6	6	6
G13	drive	2	6	Hasan Ali'nin sürdüğü miktarın 7/4'ünü sürseydi Mert kaç km araba sürmüş olur.	Hasan Ali'nin sürdüğü miktarın 1/4'ünü sürseydi Mert kaç km araba sürmüş olur.	4	4	4	4
G13	drive	3	6	Ali 120 km araba sürüp Hasan Ali'nin 5 katı kadar araba sürerse Mert hay km araba sürer.	Ali 120 km araba sürüp Hasan Alinin 5 katı kadar araba sürerse Mert kaç km araba sürer.	6	5	6	5
G13	cake	1	6	Eğer Elif kekini yemeden kendi yiyeceği kekin 1/4'ini Ve Mert'de yiyeceği kekin 1/4'ünü kübraya verdiyse Kübra ne kadar kek yemiş olur.	Eğer Elif kekini yemeden kendi yiyeceği kekin 1/4'ini Ve Mert'de yiyeceği kekin 2/4'ünü kübraya verdiyse Kübra ne kadar kek yemiş olur.	6	6	6	6
G13	cake	2	6	Bu kişiler 16' eş parçaya ayrılmış bir keki daha yiyecekse bu kişiler yetileleri toplan Kelk milkferrinin eşit olması İçin kaç parça daha kek yemeleri lazım?..	Bu kişiler 16 eş parçaya ayrılmış bir keki daha yiyecekse bu kişiler yedikleri toplam kek miktarının eşit olması İçin kaç parça daha kek yemeleri lazım?	6	6	6	6
G13	cake	3	4	3 arkadaşta keklerini yemeden keklerinin 1/4 sini Elif'in kardeşine verdiklerine göre Elif 'in kardeşi nekadar kek yemiştir.	3 arkadaşta keklerini yemeden keklerinin 2/4'sini Elif'in kardeşine verdiklerine göre Elif 'in kardeşi ne kadar kek yemiştir.	6	6	6	6
G14	drive	1	4	bunlara göre toplam gidilen mesafe kadan bir üçgenin iş açıları kadın daha kilometre eklerif bir Sekiz genin kenar Sayısı ile Çarpılırsa Sonuç kaç olur?	bunlara göre toplam gidilen mesafe kadar bir üçgenin iç açıları kadar daha kilometre eklenip bir Sekiz genin kenar Sayısı ile Çarpılırsa Sonuç kaç olur?	4	4	4	4
G14	drive	2	4	Hasanın gittiği kilometreyi 52 GÖLÜNVA Se Kaş olur?	Hasanın gittiği kilometre 5'e bölünürse kaç olur?	6	4	6	6
G14	drive	3	0			0	0	0	0
G14	cake	1	6	bu Problemde en çok yiyen kişinin en az kişinin yediği keke or anı kaçtır?	bu Problemde en çok yiyen kişinin en az kişinin yediği keke oranı kaçtır?	6	6	6	6
G14	cake	2	4	bu Problemde kekin Parça Sayısının yarısının iki eksiği en az yiyen kişiye göne eşitlen mesi için kaç azaltılıp kaç arttırılması gerekin?	bu Problemde kekin Parça Sayısının yarısının iki eksiği en az yiyen kişiye göre eşitlenmesi için kaç azaltılıp kaç arttırılması gerekir?	6	6	4	4
G14	cake	3	4	En fazla yiyen kişinin bir karenin Kenar Sayısından kaç fazladır?	En fazla yiyen kişinin bir karenin Kenar Sayısından kaç fazladır?	4	4	4	4
G15	drive	1	6	Buna göre Mert kaa kilometre araba Sürmüştür?	Buna göre Mert kaç kilometre araba Sürmüştür?	6	6	6	6
G15	drive	2	6	Mert ve Hasan Aliden kaç kilometre fazla araba sürmüşlerdir?	Mert ve Hasan Aliden kaç kilometre fazla araba sürmüşlerdir?	6	6	6	6
G15	drive	3	3	Hasan, Mert'ten kaç km fazla araba sürmüştür?	Hasan, Mert'ten kaç km fazla araba sürmüştür?	3	3	3	3
G15	cake	1	6	Elif, Mert'ten kaa parça fazla yemişif?	Elif, Mert'ten kaç parça fazla yemiştir?	6	6	6	6
G15	cake	2	6	Elif ve Mert Kübradan kaç paraa fazla yemiştir?	Elif ve Mert Kübra'dan kaç parça fazla yemiştir?	6	6	6	6
G15	cake	3	6	Elifin yedigi parçaların, Mertwe Kübranın yedigi paraalara oranı kaatır?	Elifin yedigi parçaların, Mert ve Kübranın yediği parçalara oranı kaçtır?	6	6	6	6
G16	drive	1	6	Buna göre Hasan ve Mert toplam kaç km araba kullanmıştır.	Buna göre Hasan ve Mert toplam kaç km araba kullanmıştır.	6	6	6	6
G16	drive	2	6	Mert, Ali'den ne kadar fazla km araba sürmüştür?	Mert, Ali'den ne kadar fazla km araba sürmüştür?	6	6	6	6
G16	drive	3	6	Mert - Alit Hasan (km) Bu sorunun cevabı kaçtır?"	Mert - Ali +Hasan (km)Bu sorunun cevabı kaçtır?	4	3	6	4
G16	cake	1	6	Buna göre kekten geriye kaç dilim kalmıştır?	Buna göre kekten geriye kaç dilim kalmıştır?	6	6	6	6
G16	cake	2	6	Hangi iki arkadaşın yedikleri dilimler toplanırsa diğer arkadaşın yediği dilimler eşit olur?	Hangi iki arkadaşın yedikleri dilimler toplanırsa diğer arkadaşın yediği dilimler eşit olur?	6	6	6	6
G16	cake	3	6	Kübra .... Mert Yandaki işlemler Mert.... Elif >"	Kübra .... Mert, Mert.... Elif, Elif…Kübra. Yandaki işlemleri ">, <, = " sembollerini kullanarak yapınız.	1	1	6	6
G17	drive	1	0			0	0	0	0
G17	drive	2	0			0	0	0	0
G17	drive	3	0			0	0	0	0
G17	cake	1	4	Mert keki yiyemeyeceğini söyler ve kendi dilimlerinin 2/8'ini Elif'e, 1/8'ini ise Kübra'ya verir. (Yani Mart keklerini arkadaşlarına vermiştir) Elif ise kekini yiyemeyeceğini söyleyerek kendi keklerinin 2/8'ini Kübra'ya verir. Buna göre Mert'in ve Elif'in keklerini verdiklerindeki ve yemediklerindeki Kübra'nın yediği kek sayısının farkı kaçtır?	Mert keki yiyemeyeceğini söyler ve kendi dilimlerinin 2/8'ini Elif'e, 1/8'ini ise Kübra'ya verir. (Yani Mart keklerini arkadaşlarına vermiştir) Elif ise kekini yiyemeyeceğini söyleyerek kendi keklerinin 2/8'ini Kübra'ya verir. Buna göre Mert'in ve Elif'in keklerini verdiklerindeki ve yemediklerindeki Kübra'nın yediği kek sayısının farkı kaçtır?	4	4	4	4
G17	cake	2	4	Bu 8 eşit dilimlik kek çocuklara yetmemiştir. Bir 8 eşit dilimlik (aynı) pasta daha almışlardır. Çocuklar yediklerinin 2 katı daha yiyerek (?) kaç büyü kaç pasta yemişlerdir.	Bu 8 eşit dilimlik kek çocuklara yetmemiştir. Bir 8 eşit dilimlik (aynı) pasta daha almışlardır. Çocuklar yediklerinin 2 katı daha yiyerek (?/?) kaç bölü kaç pasta yemişlerdir.	4	4	6	6
G17	cake	3	6	Bir dilim pasta 157 kalori ise tüketilen kalori miktarı lastır?	Bir dilim pasta 157 kalori ise tüketilen kalori miktarı kaçtır?	6	6	6	6
G18	drive	1	6	Bu bilgilere göre aralarında en çok araba süren hangisidir?	Bu bilgilere göre aralarında en çok araba süren hangisidir?	6	6	6	6
G18	drive	2	6	Verilen bilgilere göre araba sürdükleri kilometreyi küçükten büyüğe sıralayınız.	Verilen bilgilere göre araba sürdükleri kilometreyi küçükten büyüğe sıralayınız.	6	6	6	6
G18	drive	3	6	Bu bilgilere göre toplam gittikleri yolu hesaplayınız.	Bu bilgilere göre toplam gittikleri yolu hesaplayınız.	6	6	6	6
G18	cake	1	6	Yukarıdaki bilgilere göre Elif, Mert ve Kübra'nın yediği kekleri büyükten küçüğe sıralayınız?	Yukarıdaki bilgilere göre Elif, Mert ve Kübra'nın yediği kekleri büyükten küçüğe sıralayınız?	6	6	6	6
G18	cake	2	3	Buna göre Elif ile Mert'in yediği kek parçaları değiştirirsek en çok hangisi olur?	Buna göre Elif ile Mert'in yediği kek parçaları değiştirirsek en çok hangisi olur?	6	6	6	6
G18	cake	3	4	Buna göre bu üçünün yediği toplam kek parçalarının aritmetik ortalamasını bulunuz?	Buna göre bu üçünün yediği toplam kek parçalarının aritmetik ortalamasını bulunuz?	6	4	6	4
G19	drive	1	6	3 ortodos Rizeye gitmeye toror verirler oy em lik yolu Ho Son bos tm sörmüştür ?	3 arkadaş Rizeye gitmeye karar verirler oy km'lik yolu Hasan kaç km sürmüştür ?	6	6	6	6
G19	drive	2	6	Hoson ile: Ali Ardo Gülerin yonina yoni ispongo yo gitmişler Mertle orobosıyla birlik isponyoyo gitmiş. buno göre mert for km gitmiştir. NOT: Yol oynı km'dir	Hasan ile Ali Arda Gülerin yanına yani ispanyaya gitmişler Mertle arabasıyla birlik ispanyaya gitmiş. buna göre mert kaç km gitmiştir. NOT: Yol oynı km'dir	6	6	6	6
G19	drive	3	4	Ali Hostone den Gibip Mert'tin evine gitmiş, Mertle, Alide Mosonın evine gitmişler. Or don'do Ayder're yola çıkmışlar Ali 80 km gitmiştir, Moson @tlinin sürdüğün & koti kodor sormuşler Mert Hosondon 240 km 02 orobo Sürmüş. buna göre bas km gitmiştir.	Ali Hastaneden çıkıp Mert'tin evine gitmiş, Mertle, Alide Hasanın evine gitmişler. Ordan'da Ayder'e yola çıkmışlar Ali 80 km gitmiştir, Hasan Alinin sürdüğünün 3 katı kadar sürmüşler Mert Hasandan 240 km az araba Sürmüş. buna göre kaç km gitmiştir.	6	6	5	5
G19	cake	1	5	Elif ve Mert 8 es parçaya bölünmüş bir kekin 7/8 sini yediyse kübra ne kadar yemiştir?	Elif ve Mert 8 es parçaya bölünmüş bir kekin 6/8'sını yediyse kübra ne kadar yemiştir?	6	6	6	6
G19	cake	2	5	Elif, Mert ve Kübra pastaneden bir kek almışlar ve bu keki 8 es parçaya bölmüşler. Mert ve Kübra aynı yemişler. En fazla yiyen Elif. Buna göre Elif ne kadar yemiştir?	Elif, Mert ve Kübra pastaneden bir kek almışlar ve bu keki 8 es parçaya bölmüşler. En fazla yiyen Elif Mert ve Kübra aynı yemişler buna göre Elif ne kadar yemiştir?	5	5	5	5
G19	cake	3	3	Elif 8 es parçaya ayrılmış bir kekin 3/8 sini yemiş. Kübra ise 2/8 sini yemiş. Buna göre Mert ne kadar yemiştir?	Elif 8 es parçaya ayrılmış bir kekin 2/4 sini yemiş. Kübra ise 2/8 sini yemiş. Buna göre Mert ne kadar yemiştir?	5	5	6	5
G2	drive	1	6	Toplamda kaç km araba sürülmüştür?	Toplamda kaç km araba sürülmüştür?	6	6	6	6
G2	drive	2	6	Mert ve Alinin toplum km si Hasan dan ne kadar dadır?	Mert ve Alinin toplam km si Hasan dan ne kadar azdır?	6	6	6	6
G2	drive	3	4	Toplim gittikleri yolun 2 katının 5 eksiği kaçtır?	Toplam gittikleri yolun 2 katının 5 eksiği kaçtır?	6	6	6	6
G2	cake	1	6	Buna göre en fazla keki kim yemiştir?	Buna göre en fazla keki kim yemiştir?	6	6	6	6
G2	cake	2	6	Buna göre en az keki kim yemiştir?	Buna göre en az keki kim yemiştir?	6	6	6	6
G2	cake	3	6	Buna göre en az yiyenden en fazla doğru sıralayın?	Buna göre en az yiyenden en fazlaya doğru sıralayın?	6	6	6	6
G20	drive	1	6	Yol kaç kilometredir	Yol kaç kilometredir	6	6	6	6
G20	drive	2	6	Ali Hasan Mert Yolda iken şarkı dinlemek istemişler ama berkes farklı seçmiş bu yüzden enfazla sürer seçin demişler buna göre kimlerin şarkıları seçilmemişti	Ali Hasan Mert Yolda iken şarkı dinlemek istemişler ama herkes farklı seçmiş bu yüzden en fazla süren seçin demişler buna göre kimlerin şarkıları seçilmemişti	6	6	6	6
G20	drive	3	0			0	0	0	0
G20	cake	1	6	Mert Doğum günü partisine arkadaşları Elif ve Kübra yı çağırmıştır, Mert partiye bir kek almış ve keki 16 eşit parçayu bölmüş, Elif kekin 32/16, Mert 1/4, Kübra ise 7/8 yemiştir, Buna göre Mert keki 120TL'ye almıştır kim kekten yediği pay enpanalıdır.	Mert Doğum günü partisine arkadaşları Elif ve Kübra'yı çağırmıştır, Mert partiye bir kek almış ve keki 16 eşit parçaya bölmüş. Elif kekin 16/32, Mert 1/4, Kübra ise 32/128 yemiştir. Buna göre Mert keki 120TL'ye almıştır kim kekten yediği pay en pahalıdır.	4	4	6	6
G20	cake	2	6	Mert, Kübra, Elif dışarıya çıkmışlardır. Gezerken pastanenin önünden geçerken çaları pasta çekmis. Mert pasta parasının 128/32 kuburını vermiştir. Kübra 2/4, Elif 4/1024 ödemiştir. Aldıktan sonra 8 bölüp mert, 1/728 kübra 256/1024 Elif 2/1 ini yemiştir en az ödeyip en fazla yiyen kimdir	Mert, Kübra, Elif dışarıya çıkmışlardır. Gezerken pastanenin önünden geçerken canları pasta çekmiş. Mert pasta parasının 128/512 kadarını vermiştir. Kübra 32/128, Elif 2/4 ödemiştir. Aldıktan sonra 8 bölüp mert, 1/4 kübra 256/1024 Elif 1/2'ini yemiştir en az ödeyip en fazla yiyen kimdir	4	4	6	6
G20	cake	3	0			0	0	0	0
G21	drive	1	4	Problem 1: Hasan 480 km araba sürmüş ali 80 km araba kullanmış sürtünme kuvvet yolun 2/4 sinde yolu 2 kat uzatış sürtünmek kumari = 3/2 yolun yarısında azaltmıştır buna göre 1 km=1dk olduğuna göe kaç dk da istedikleri yere varmster.	Hasan 480 km araba sürmüş ali 80 km araba kullanmış sürtünme kuvvet yolun 2/4 sinde yolu 2 kat uzatmış sürtünmek kuvveti 2/3 yolun yarısında azaltmıştır buna göre 1 km=1dk olduğuna göe kaç dk da istedikleri yere varmıştır.	4	4	4	4
G21	drive	2	5	Problem 2: Eğerli ali 30 km araba sünie hasan alinin 3 katı kadar araba sürseydi, aradaki değişim altı çizili bilgiden kaç adımış veya azalmıştır,	Eğerki ali 30 km araba sürüp hasan alinin 3 katı kadar araba sürseydi, aradaki değişim altı çizili bilgiden kaç artmış veya azalmıştır.	5	5	5	6
G21	drive	3	0			0	0	0	0
G21	cake	1	6	Elif ile Mert'in yediği keklerin toplamı Kübra'nın yediği keke oranı kaçtır?	Elif ile Mertin yediği keklerin toplamı Kübranın yediği keke oranı kaçtır.	6	6	6	6
G21	cake	2	6	Eğer herkes yediği kekin 1/4 azını yense toplam ne kadar kek yenir?	Eğer herkes yediği kekin 1/4 azını yerse toplam ne kadar kek yenir.	6	6	6	6
G21	cake	3	6	1/2 kek yeme hızı erkekler için 3 dk, kızlar 2dk da yiyebilmektedir. Kekleri Elif, Mert, Kübra sırasıyla biri bitirince öbürüne geçerek şartıyla hepsi kek yediğine göre bu kekleri yiyip bitirme süresi kaç dk dır?	1/8 kek yeme hızı erkekler için 3 dk kızlar 2dk da yiyebilmektedir. Kekleri Elif, mert, kübra sırasıyla biri bitirince öbürüne geçmek şartıyla hepsi keki yediğine göre bu kekleri yiyip bitirme süresi kaç dk dır.	6	6	6	6
G22	drive	1	6	Mert Hasandan 240 km az araba sürmüştür. Hasan Ali'nin sürdüğü miktarın 9 katı kadar araba sürmüştür. Ali 80 km araba sürmüştür. Buna göre Mert kaç km araba sürmüştür? İşlemlerinizi gösteriniz.	Mert Hasandan 240 km az araba sürmüştür. Hasan Ali'nin sürdüğü miktarın 9 katı kadar araba sürmüştür. Ali 80 km araba sürmüştür. Buna göre Mert kaç km araba sürmüştür? İşlemlerinizi gösteriniz.	6	6	6	6
G22	drive	2	4	Mert Hasandan 240 km az araba sürmüştür. Hasan Ali'nin sürdüğü miktarın 9 katı kadar araba sürmüştür. Ali 80 km araba sürmüştür. Buna göre Mert ve Hasanın sürdükleri zamanın çarpımından Alinin sürdüğü zamanın farkı kaçtır ? işlemlerinizi göstererek bulun.	Mert Hasandan 240 km az araba sürmüştür Hasan Alinin sürdüğü miktarın 9 katı kadar araba sürmüştür. Ali 80 km araba sürmüştür. Buna göre Mert ve Hasanın sürdükleri zamanın çarpımından Alinin sürdüğü zamanın farkı kaçtır ? işlemlerinizi göstererek bulunuz.	5	5	5	4
G22	drive	3	6	Mert Hasandan 240 km az araba sürmüştür. Hasan Ali'nin sürdüğü miktarın 9 katı kadar araba sürmüştür. Ali 80 km araba sürmüştür. En çok araba sürenden en az araba sürene kadar sıralayınız. İşlemlerinizi göstererek bulun.	Mert Hasandan 240 km az araba sürmüştür Hasan Alinin sürdüğü miktarın 9 katı kadar araba sürmüştür. Ali 80 km araba sürmüştür. En çok araba sürenden en az araba sürene kadar sıralayınız. İşlemlerinizi göstererek bulunuz.	6	6	6	6
G22	cake	1	5	Problem 1: Bir kek 8 eşit parçaya ayrılmıştır. Mert ve kübra eşit kek yemiştir Elif bu kekin kaçta kaçını yemiştir işlemleriniz ile gösteriniz.	Problem 1: Bir kek 8 eşit parçaya ayrılmıştır. Mert ve kübra eşit kek yemiştir Elif bu kekin kaçta kaçını yemiştir işlemleriniz ile gösteriniz.	3	3	3	3
G22	cake	2	3	Problem 2: Bir kek 8 eşir parçaya ayrılmıştır. Elif kekin ¼'ünü Mert 2/8 ve kübra ise 2/8'ini yemiştir. Kim kekten daha çok yemiştir Büyükten küçüğe doğru sıralayınız,	Bir kek 8 eşir parçaya ayrılmıştır. Elif kekin 4/8'ini Mert 2/8'ini ve kübra ise 2/8'ini yemiştir. Kim kekten daha çok yemiştir Büyükten küçüğe doğru sıralayınız.	6	6	6	6
G22	cake	3	6	Problem 3: Birkek 8 eşit parçaya bolamıstır Elif kekin 4/8 Mert 2/8'ini yemiştir kübra ise 2/8'ini yemiştir Elif ile Mertin toplamı Kübradan ne kader fazladır ondalık işlemlerle gosteinil	Birkek 8 eşit parçaya bölünmüştür Elif kekin 4/8'ini Mert 2/8'ini yemiştir kübra ise 2/8'ini yemiştir Elif ile Mertin toplamı Kübradan ne kader fazladır ondalık işlemlerle gösteriniz	6	6	6	6
G23	drive	1	6	Buna göre Hasan kaç km yol araba kullanmıştır?	Buna göre Hasan kaç km yol araba kullanmıştır?	6	6	6	6
G23	drive	2	6	Buna göre Hasan ile Ali toplam kaç km araba kullanmıştır?	Buna göre Hasanla Ali toplam kaç km araba kullanmıştır.	6	6	6	6
G23	drive	3	6	Hasan ile Ali'nin gittiği yol farkı nedir?	Hasanla Alinin gittiği yol farkı nedir.	6	6	6	6
G23	cake	1	6	Buna göre Elif ile Kübra'nın yediği kek sayısı Mert'in yediği kek sayısından ne kadar fazladır?	Buna göre Elif ile Kübranın yediği kek sayısı Mertin yediği kek sayısından ne kadar fazladır?	6	6	6	6
G23	cake	2	0			0	0	0	0
G23	cake	3	0			0	0	0	0
G24	drive	1	6	Buna göre Hasan ne kadar yol gitmiştir.	Buna göre Hasan ne kadar yol gitmiştir.	6	6	6	6
G24	drive	2	6	En çok kim yol gitmiştir	En çok kim yol gitmiştir	6	6	6	6
G24	drive	3	6	En az kim yol gitmiştir	En az kim yol gitmiştir	6	6	6	6
G24	cake	1	6	Emir 200kmlik yolun ilk 4/8'ini gitmiştir. daha sonra 2/8'ini gitri sonrada 2/8'ini gitmiştir Emirin. kac km yolu kalmıştır.	Emir 200km'lik yolun ilk 4/8'ini gitmiştir. daha sonra 2/8'ini gitti sonrada 2/8'ini gitmiştir. Emirin kaç km yolu kalmıştır.	6	6	6	6
G24	cake	2	6	H ason 3m² evinin 2/8'ini mutfak, 2/8'ini salon, 2/8'ini odasına vermiştir Hasan'ın kaa m² si kalmıştır	Hasan 3m² evinin 2/8'ini mutfak, 2/8'ini salon, 2/8'ini odasına vermiştir Hasan'ın kaç m² si kalmıştır.	6	6	6	6
G24	cake	3	6	En az kim kek yemiştir	En az kim kek yemiştir	6	6	6	6
G25	drive	1	5	3 arkadoş yolculuğa çıkmışır. Mert, Hasandan 240 km az sürmüştür. All 80km sürmüştür buna göre tasekm yol gitmistir	3 arkadaş yolculuğa çıkmışır. Mert, Hasandan 240 km az sürmüştür. Ali 80 km sürmüştür buna göre kaç km yol gitmistir	5	5	5	5
G25	drive	2	0			0	0	0	0
G25	drive	3	0			0	0	0	0
G25	cake	1	6	Bir kek 8 eşit parçaya bolünmüşter. Elif kekin 4/8 yemiştir. Mert ve Kübra ayını oranda kek yemiştir buna göre mert ve Kübra ne kadar kek yemiştir	Bir kek 8 eşit parçaya bolünmüştür. Elif kekin 4/8 yemiştir. Mert ve Kübra ayını oranda kek yemiştir buna göre mert ve Kübra ne kadar kek yemiştir	5	5	5	5
G25	cake	2	5	Bir kek vordir Elif 4/8'ini Mert 2/8 sini ve kibro 2/8 sini yemiştir buna göre bu kek koc, porçadir	Bir kek vardır Elif 4/8'ini Mert 2/8 sini ve kübra 2/8 sini yemiştir buna göre bu kek kaç parçadır	3	3	6	3
G25	cake	3	5	Bir kek 8 porçaya bölünmüştür. Elif 4/8 ini yemiştir buno gore Mer ve kübra kae parça kek yemiştir	Bir kek 8 parçaya bölünmüştür. Elif 4/8 ini yemiştir buna göre Mert ve kübra kaç parça kek yemiştir	6	5	5	5
G26	drive	1	6	Buna göre Mert ile Hasanın sürdüğü Araba km si koçtır?	Buna göre Mert ile Hasanın sürdüğü Araba km si kaçtır?	6	6	6	6
G26	drive	2	6	Pouna göre you kaa lkm'dir?	Buna göre yol kaç km'dir?	6	6	6	6
G26	drive	3	6	Alinin Sürdüğü yol km'si mertin Sürdüğü yol km'sinin Yüzde kaçına eşittir?	Alinin Sürdüğü yol km'si mertin Sürdüğü yol km'sinin Yüzde kaçına eşittir?	6	6	6	6
G26	cake	1	6	Elifin yediği kek milte Mertir yediği vek miktorinin Vaata kaçına eşittir?	Elifin yediği kek mikt Mertin yediği kek miktarının kaçta kaçına eşittir?	6	6	6	6
G26	cake	2	6	Arkadaşları Ali'de bu etkinliğe katılmıştır. Ali 4 kek dilimide gatirdiğine göre, Ali bu kek dilimlerinin kuata kaçını yomistir. ?	Arkadaşları Ali'de bu etkinliğe katılmıştır. Ali 4 kek dilimide getirdiğine göre, Ali bu kek dilimlerinin kaçta kaçını yemiştir.?	5	5	5	5
G26	cake	3	4	Kübra Eliçin kek dilimlerinin Geyreğini yediğine gele Son durumda Kübra ile Elif kaa dilim kek yemiştir?	Kübra Elifin kek dilimlerinin çeyreğini yediğine gör Son durumda Kübra ile Elif kaç dilim kek yemiştir?	6	6	6	6
G27	drive	1	6	Ali, Hasan ve Mert birlikte hafta sonu tatili için gittikleri geti-den geri dönmektedirler. Dönüşümlü olarak araba kullanmışlardır, Mert, Hasan'dan 240 km az araba sürdü. Hasan, Ali'nin sürdüğü miktarın 9 katı kadar araba sürdü. Ali 80 km araba sürdüğüne göre Mert kaç km araba sürmüştür?	Ali, Hasan ve Mert birlikte hafta sonu tatili için gittikleri geziden geri dönmektedirler. Dönüşümlü olarak araba kullanmışlardır. Mert, Hasan'dan 240 km az araba sürdü. Hasan, Ali'nin sürdüğü miktarın 9 katı kadar araba sürdü. Ali 80 km araba sürdüğüne göre Mert kaç km araba sürmüştür?	6	6	6	6
G27	drive	2	6	Ali, Hasan ve Mert birlikte aynı arabayla hafta sonu tatili için gittikleri geziden dönmektedirler. Dönüşümlü olarak araba kullanarak yolculuğu tamamladılar. Mert, Hasan'dan 240 km az araba sürdü. Hasan, Ali'nin sürdüğü miktarın 9 katı araba sürdü. Ali 80 km sürdüğüne göre. Mert ve Hasan 'in sürdükleri miktarın toplamı kaçtır?	Ali, Hasan ve Mert birlikte aynı arabayla hafta sonu tatili için gittikleri geziden dönmektedirler. Dönüşümlü olarak araba kullanarak yolculuğu tamamladılar. Mert, Hasan'dan 240 km az araba sürdü. Hasan, Ali'nin sürdüğü miktarın 9 katı araba sürdü. Ali 80 km sürdüğüne göre. Mert ve Hasan 'in sürdükleri miktarın toplamı kaçtır?	6	6	6	6
G27	drive	3	6	Ali, Hasan ve Mert birlikte aynı arabayla hafta sonu tatili için gittikleri geziden dönmektedirler. Dönüşümlü olarak araba kullanarak yolculuğu tamamladılar. Mert, Hasan'dan 240 km az araba sürdü. Hasan, Ali 'nin sürdüğü miktarın 9 katı kadar araba sürdü. Ali 80 km araba sürdüğüne göre yol kaç km 'dir?	Ali, Hasan ve Mert birlikte aynı arabayla hafta sonu tatili için gittikleri geziden dönmektedirler. Dönüşümlü olarak araba kullanarak yolculuğu tamamladılar. Mert, Hasan'dan 240 km az araba sürdü. Hasan, Ali 'nin sürdüğü miktarın 9 katı kadar araba sürdü. Ali 80 km araba sürdüğüne göre yol kaç km 'dir?	6	6	6	6
G27	cake	1	6	Bir kek 8 eşit parçaya bölünmüştür. Elif, Mert ve Kübra bu keki ortak yiyerek bitirmişlerdir. Elif kekin 4/8'ini, Mert 2/8'ini yediğine göre Kübra ne kadar yemiştir?	Bir kek 8 eşit parçaya bölünmüştür. Elif, Mert ve Kübra bu keki ortak yiyerek bitirmişlerdir. Elif kekin 4/8'ini, Mert 2/8'ini yediğine göre Kübra ne kadar yemiştir?	6	6	6	6
G27	cake	2	6	Bir kek 8 eşit parçaya bölünmüştür. Elif kekin 4/8'ini, Mert 2/8'ini, Kübra ise 2/8'ini yemiştir. Buna göre bu kişilerin ne kadar yediğini küçükten büyüğe sıralayınız?	Bir kek 8 eşit parçaya bölünmüştür. Elif kekin 4/8'ini, Mert 2/8'ini, Kübra ise 2/8'ini yemiştir. Buna göre bu kişilerin ne kadar yediğini küçükten büyüğe sıralayınız?	6	6	6	6
G27	cake	3	3	Bir kek 8 eşit parçaya ayrılmıştır. Elif kekin 4/8'ini, Mert 2/8'ini, Kübra da 2/8'ini yiyerek bu keki bitirdiklerine göre bu kekin tamamını kesir olarak gösteriniz?	Bir kek 8 eşit parçaya ayrılmıştır. Elif kekin 4/8'ini, Mert 2/8'ini, Kübra da 2/8'ini yiyerek bu keki bitirdiklerine göre bu kekin tamamını kesir olarak gösteriniz?	6	6	6	6
G28	drive	1	6	Buna göre Ali, Hasan ve Mert toplam kaç km araba sürmüştür?	Buna göre Ali, Hasan ve Mert toplam kaç km araba sürmüştür?	6	6	6	6
G28	drive	2	4	Buna göre Ali, Hasen ve Mert'in gittiği toplom km Sayısının Geyreği koctır?	Buna göre Ali, Hasan ve Mert'in gittiği toplam km Sayısının çeyreği kaçtır?	6	6	6	6
G28	drive	3	4	Buna göe Maltin sürdüğü km sayısının yarısını Al ve Hason sürdüğüne göre kou kilometre araba sürmüşlerdir?	Buna göre Mert'in sürdüğü km sayısının yarısını Ali yarısını Hasan sürdüğüne göre Ali ve Hasan toplam kilometre araba sürmüşlerdir?	4	4	4	4
G28	cake	1	6	Buna göre bu kekten en fazla yiyen kişi kimdir?	Buna göre bu kekten en fazla yiyen kişi kimdir?	6	6	6	6
G28	cake	2	6	Buna gore bu kekten ef az yiyen kisi kimdir?	Buna gore bu kekten ef az yiyen kişi kimdir?	6	6	6	6
G28	cake	3	6	Buna göre 1 kek daha yopılıp herkes bir önce yediği kek diliminin yarışını yediğine göre Elif ve Kübra'nın yediği kek dilimi sayısı Mert'in yediği kek diliminden kata fozladır?	Buna göre 1 kek daha yapılıp herkes bir önce yediği kek diliminin yarısını yediğine göre Elif ve Kübra'nın yediği kek dilimi sayısı Mert'in yediği kek diliminden kaç fazladır?	6	6	6	6
G29	drive	1	6	Buna göre bu araba yolculuğunda en fazla kim araba sürmüştür?	Buna göre bu araba yolculuğunda en fazla kim araba sürmüştür?	6	6	6	6
G29	drive	2	6	Buna göre hasan kaa kilometre boyunca araba sürmüşür tür?	Buna göre hasan kaç kilometre boyunca araba sürmüştür?	6	6	6	6
G29	drive	3	6	Buna göre yol kaa kilometre dir?	Buna göre yol kaç kilometredir?	6	6	6	6
G29	cake	1	6	Arkadaşlarıyla tatlı yemek için bir tatlıcıya gitmiştir. Beraber yemek için kek sipariş yemişlerdir. Gelen keki 8 eş parçaya bölmüşlerdir. Elif kekin 2/8'ini, Mert 3/8'ini, Kübra 2/8'ini yemiştir. Kübra ve Mert'in yediklerinin Ellif'in yediklerine oranı kaçtır?	Arkadaşlarıyla tatlı yemek için bir tatlıcıya gitmiştir. Beraber yemek için kek sipariş yemişlerdir. Gelen keki 8 eş parçaya bölmüşlerdir. Elif kekin 4/8'ini, Mert 2/8'ini, Kübra 2/8'ini yemiştir. Kübra ve Mert'in yediklerinin Elif'in yediklerine oranı kaçtır?	6	6	6	6
G29	cake	2	4	Eğer kek 16 parçaya bölünseydi Kübra'nın yediği porqanın ondalık yazılımı nasıl olurdu?	Eğer kek 16 parçaya bölünseydi Kübra'nın yediği parçanın ondalık yazılımı nasıl olurdu?	6	6	6	6
G29	cake	3	5	8 parçalık kekin elif, kübra ve mert'e ortak olarak paylaştırılırsa birinin yediği parcasının kekin kaçta kaçıdır?	8 parçalık kekin elif, kübra ve mert'e ortak olarak paylaştırılırsa birinin yediği parcası kekin kaçta kaçıdır?	6	6	6	6
G3	drive	1	6	Hasan Ali den kaç km fazla araba Sürmüştür	Hasan Ali den kaç km fazla araba Sürmüştür	6	6	6	6
G3	drive	2	6	Mert kaç km araç Sündmustör	Mert kaç km araç sürmüştür	6	6	6	6
G3	drive	3	6	Hasana sürdüğü araba Mertle Alinin Sürdüğü arabordan kaç fazladır	Hasana sürdüğü araba Mertle Alinin Sürdüğü arabadan kaç fazladır	6	6	6	6
G3	cake	1	6	Buna göre en çok parçayı kim yemiştir	Buna göre en çok parçayı kim yemiştir	6	6	6	6
G3	cake	2	3	kimler eşit Parça gemiştir	kimler eşit Parça yemiştir	6	3	3	3
G3	cake	3	6	Buna göre elifin yediği hekle Mertin yediği hek arasındaki fark kaçtır	Buna göre elifin yediği kekle Mertin yediği kek arasındaki fark kaçtır	6	6	6	6
G4	drive	1	6	Buna göre geri dönerken toplam kaç km gitmişlerdir?	Buna göre geri dönerken toplam kaç km gitmişlerdir?	6	6	6	6
G4	drive	2	5	Eğer Mert Hasan'dan 37 km fazla, Hasan Ali'nin sürdüğü miktardan 13 katı kadar araba sürseydi toplam kaç km giderlerdi?	Eğer Mert Hasan'dan 37 km fazla, Hasan Ali'nin sürdüğü miktardan 13 katı kadar araba sürseydi toplam kaç km giderlerdi?	6	6	6	6
G4	drive	3	6	Bu üç arkadaşın toplam gittiği yolu küçükten büyüğe sıralayınız.	Bu üç arkadaşın toplam gittiği yolu küçükten büyüğe sıralayınız.	6	6	6	6
G4	cake	1	3	Eğer bu kek 16 parçaya ayrılmış olsaydı Mert bu kekin kaçtar kaçını yemiş olurdu?	Eğer bu kek 16 parçaya ayrılmış olsaydı Mert bu kekin kaçta kaçını yemiş olurdu?	6	6	6	6
G4	cake	2	6	Elif ve Kübranın yediği parça toplame Mertten kaç fazladır?	Elif ve Kübranın yediği parça toplamı Mertten kaç fazladır?	6	6	6	6
G4	cake	3	5	Eğer Elif kebin ³/₈'ünü Mert've ¹/₈'ini yeseydi kekin kaçtı kaçı kallırdı?	Eğer Elif kekin 3/8'ünü Mert'e 1/8'ini yeseydi kekin kaçta kaçı kalırdı?	6	6	6	6
G5	drive	1	6	Hasan kaç km Araba sürmüştür?	Hasan kaç km Araba sürmüştür?	6	6	6	6
G5	drive	2	4	Hasan'ın sürdüğü km miktarı Mert ve Hasan'ın sürdüğü km'lerin toplamından ne kadar fazladır?	Hasan'ın sürdüğü km miktarı Mert ve Hasan'ın sürdüğü km'lerin toplamından ne kadar fazladır?	4	4	4	4
G5	drive	3	6	3 Arkadaş, döndüklerinde hepsi Toplam kaç km araba sürmüştür?	3 Arkadaş, döndüklerinde hepsi Toplam kaç km araba sürmüştür?	6	6	6	6
G5	cake	1	6	Yukarıdakı verilen Lere göre Elif ve Kübranın yedikleri kek dilimi miktarı ile Mert'in yediği kek dilimi miktarına oranı kaçtır?	Yukarıdaki verilenlere göre Elif ve Kübranın yedikleri kek dilimi miktarı ile Mert'in yediği kek dilimi miktarına oranı kaçtır?	6	6	6	6
G5	cake	2	6	Mert ve Kübra'nın yedikleri dilim miktarı, kalan dilim miktarından kaç fazladır?	Mert ve Kübra'nın yedikleri dilim miktarı, kalan dilim miktarından kaç fazladır?	6	6	6	6
G5	cake	3	6	Toplam kekin (8 dilimin) Elif'in yediği dilim miktarına oranı kaçtır.	Toplam kekin (8 dilimin) Elif'in yediği dilim miktarına oranı kaçtır.	6	6	6	6
G6	drive	1	6	Hasanın gittiği yol mert ile Aliden nekader az veya fazladır (Bütün işlemi yazınız)	Hasanın gittiği yol mert ile Aliden nekader az veya fazladır (Bütün işlemi yazınız)	6	6	6	6
G6	drive	2	6	Alinin gittiği yol Bütün gidilen yoldan nekadar azdır. (Bütün işleri yazın)	Alinin gittiği yol Bütün gidilen yoldan ne kadar azdır. (Bütün işlemi yazın) (Emirdir)	6	6	6	6
G6	drive	3	6	Hasan Alinin sürdüğü yolun 5 katını Sür seydi ne kadar sürmüş olurdu	Hasan Alinin sürdüğü yolun 5 katını Sürseydi ne kadar sürmüş olurdu	6	6	6	6
G6	cake	1	6	Bu işleme göre nekódor Pasta kalkmıştır? (Bütün işlemi gösteriniz)	Bu işleme göre ne kadar pasta kalmıştır? (Bütün işlemi gösteriniz)	6	6	6	6
G6	cake	2	6	Buna göre Elifin yediği pasta Arkadaşlarının yediği Pastadan nekadar fazladır (Bütün işlemi gösterin)	Buna göre Elifin yediği pasta Arkadaşlarının yediği Pastadan nekadar fazladır (Bütün işlemi gösterin)	6	6	6	6
G6	cake	3	6	Elif ile kübranın toplamı Mertten kaç kat feladır	Elif ile kübranın toplamı Mertten kaç kat fazladır	6	6	6	6
G7	drive	1	6	Mert ne kadar yol almıştır?	Mert ne kadar km yol almıştır?	6	6	6	6
G7	drive	2	3	Ali ne kadar km yol almıştır?	Ali ne kadar km yol almıştır?	3	3	3	3
G7	drive	3	6	Hasan ve Ali'nin aldığı km yoldan Mert'in aldığı yolu çıkar.	Hasan ve Ali'nin aldığı km yoldan Mert'in aldığı yolu çıkart.	6	6	6	6
G7	cake	1	3	Yenilen keki bulunuz.	Yenilen keki bulunuz.	6	6	6	6
G7	cake	2	6	mert ve kabián yediği kele minstormi Elif 'in yediği milktardan 4 karnız,	mert ve kübranın yediği kek miktarını Elif 'in yediği miktardan çıkarnız.	6	6	6	6
G7	cake	3	6	Elif ve Mert'in yediği miktardan Kübra'ın yedai miktarn Elkar,	Elif ve Mert'in yediği miktardan Kübra'ın yediği miktarı çıkar.	6	6	6	6
G8	drive	1	6	Buna göre Mert'in kaç km araba sürdüğünü bulunuz -	Buna göre Mert'in kaç km araba sürdüğünü bulunuz.	6	6	6	6
G8	drive	2	6	Buna göre Hasan kaç km alaba sürümüşelı	Buna göre Hasan kaç km araba sürümüştür	6	6	6	6
G8	drive	3	6	Toplam kaç km gidilediğini bucenuz	Toplam kaç km gidildiğini bulunuz	6	6	6	6
G8	cake	1	6	Elif mert'den ne kadar fazla kek yemişti?	Elif mert'den ne kadar fazla kek yemişti?	6	6	6	6
G8	cake	2	6	Buna göre en son kaç dilim kek kalmıştı?	Buna göre en son kaç dilim kek kalmıştır.	6	6	6	6
G8	cake	3	6	Mert ve Kübra'nın yediği kek dilimlerini toplayıp, Elif'in yediği kek sayısından çıkartınız.	Mert ve Kübra'nın yediği kek dilimlerini toplayıp, Elif'in yediği kek sayısından çıkartınız.	6	6	6	6
G9	drive	1	6	En çok sciren den en az sürene sıralayınız	En çok sürenden en az sürene sıralayınız	6	6	6	6
G9	drive	2	6	Yol toplam kaç km'dir	Yol toplam kaç km'dir	6	6	6	6
G9	drive	3	6	Ali ile Hosanin gittiği yolmikta ri Mert'ten kaç forladın	Ali ile Hasanin gittiği yol miktarı Mert'ten kaç fazladır	6	6	6	6
G9	cake	1	6	Bir kek 8 eşit parçaga ayrılmıştır. Elif kekin 2/8'ini Mert 2/8'ini ve Kübra ise 2/8'ini gemiştir. Buna göre hangi ikisini taplarsak geriye pastanın çeyreği kalır?	Bir kek 8 eşit parçaya ayrılmıştır. Elif kekin 4/8'ini Mert 2/8'ini ve Kübra ise 2/8'ini yemiştir. Buna göre hangi ikisini toplarsak geriye pastanın çeyreği kalır?	4	6	6	6
G9	cake	2	6	Buna göre kaç dilim parça kalmıştır?	Buna göre kaç dilim parça kalmıştır?	6	6	6	6
G9	cake	3	6	Mertle Kabranın toplam dilim sagısı kaçtır?	Mertle Kübranın toplam dilim sayısı kaçtır?	6	6	6	6
H1	drive	1	3	Mert, Hasan dan kaç km Sürmüştür	Mert, Hasan dan kaç km Sürmüştür	3	6	3	6
H1	drive	2	3	Hasan Aliden Kaa km Kat Sürmüştür	Hasan Aliden kaç km kat sürmüştür	4	4	4	3
H1	drive	3	6	Mertin Sür düğü km Ali Ve Hasanın Kaa katını sürmüştür.	Mertin sürdüğü km Ali ve Hasanın kaç katını sürmüştür.	6	6	6	6
H1	cake	1	6	Mert ve Kübra , Elifin Kaa katını yemiştir	Mert ve Kübra Elif'in Kaç katını yemiştir	6	6	6	6
H1	cake	2	2	Elif , Mert ve Kübra nin Kaç fazlasını yemiştir	Elif, Mert ve Kübra nin kaç fazlasını yemiştir	6	6	6	6
H1	cake	3	6	Elifin yediği Kek Sayısı ve mert ile Kübranın yediği kek sayısının toplamı Kaçtır.	Elifin yediği Kek Sayısı ve mert ile Kübranın yediği kek sayısının toplamı Kaçtır.	6	6	6	6
H2	drive	1	6	Bana göre Mert Kaç Km acaba sürmüştür?	Bana göre Mert Kaç Km araba sürmüştür?	6	6	6	6
H2	drive	2	6	Bana göre en az kim araba Sürmüştül,	Bana göre en az kim araba sürmüştür.	6	6	6	6
H2	drive	3	6	Bana göre Ali ile Mert kaç Km araba sürmüştür,	Bana göre Ali ile Mert kaç Km araba sürmüştür.	6	6	6	6
H2	cake	1	6	Elif ile Mert toplam kaç dilim kek yemiştir.	Elif ile Mert toplam kaç dilim kek yemiştir.	6	6	6	6
H2	cake	2	6	Elif Küba'dan kaç fazla dilim yemiştir.	Elif Kübra'dan kaç fazla dilim yemiştir.	6	6	6	6
H2	cake	3	6	Her kek dilimi 5TL olduğuna göre Kübra ile Mert kek dilimlerine kaç TL ödenilir	Her kek dilimi 5TL olduğuna göre Kübra ile Mert kek dilimlerine kaç TL ödemiştir.	6	6	6	6
H3	drive	1	6	Buna göfe en fazla kim sürmüştür ?	Buna göre en fazla kim sürmüştür ?	6	6	6	6
H3	drive	2	3	Hasan ve Melti km olarak karşılaştıralım	Hasan ve Merti km olarak karşılaştıralım	6	3	6	3
H3	drive	3	2	En fazla kim sülmüştür	En fazla kim sürmüştür	6	6	6	6
H3	cake	1	6	Buna göre Elifin yediği kek sayısına göre Meltin kaçta kaçı olur?	Buna göre Elifin yediği kek sayısına göre Mertin kaçta kaçı olur?	6	6	6	6
H3	cake	2	6	En az kim yemiştir?	En az kim yemiştir?	6	6	6	6
H3	cake	3	6	En az yiyen ve en çok yiyenleri karşılaştıralım?	En az yiyen ve en çok yiyenleri karşılaştıralım?	6	6	6	6
H4	drive	1	3	Problem 1: Hafta sonu nereye gittiler?	Problem 1: Hafta sonu nereye gittiler?	1	3	1	3
H4	drive	2	3	Problem 2: Mert, Hasan'dan kaç km 92 Sürmüştür?	Mert, Hasan'dan kaç km az sürmüştür?	3	4	3	3
H4	drive	3	3	Problem 3: Ali kaç km araba sürmüştür?	Problem 3: Ali kaç km araba sürmüştür?	3	3	3	3
H4	cake	1	6	Ençok kim yemiştir?	Ençok kim yemiştir?	6	6	6	6
H4	cake	2	6	Kekin Mert'le ve Kübra'nın toplamı Elif'in kekine eşittmi?	Kekin Mert'le ve Kübra'nın toplamı Elif'in kekine eşittmi?	6	6	6	6
H4	cake	3	3	Kek neli?	Kek neli?	1	1	1	1
H5	drive	1	6	Hasan, Ali'den kaç km daha fazla gitmiştir?	hasan, Ali'den km daha fazla gitmiştir?	6	6	6	6
H5	drive	2	6	Mert kaç km yol almıştır?	Mert kaç km yol almıştır?	6	6	6	6
H5	drive	3	3	Mert Hasan'dan kaç km az araba sürmüştür?	Mert Hasan'da kaç km az araba sürmüştür?	3	3	3	3
H5	cake	1	6	Elif, Kübra'nın yediği kekin kaç katıdır?	Elif, Kübra'nın yediği kekin kaç katıdır?	6	6	6	6
H5	cake	2	5	Elif, 8 dilime ayırdığı keki arkadaşlarına dağıtmıştır fakat sonunda en çok keki yiyen kişi Elif çıkmıştır. Buna göre Elif arkadaşlarından en fazla kaç dilim yemiştir?	Elif, 8 dilime ayırdığı keki arkadaşlarına dağıtmıştır fakat sonrasında en çok keki yiyen kişi Elif çıkmıştır. Buna göre Elif arkadaşlarından en fazla kaç dilim yemiştir?	6	6	6	6
H5	cake	3	6	Elif ile Mert'in toplam kaç kek dilimi yemişlerdir?	Elif ile Mert'in toplam kaç kek dilimi yemişlerdir?	6	6	6	6
H6	drive	1	6	Buna göre 3 arkadaşın sürdüğü km kaçtır?	Buna göre 3 arkadaşın sürdüğü km kaçtır?	6	6	6	6
H6	drive	2	6	Buna göre Hasan ve Ali'nin gittiği yolun toplamı kaçtır?	Buna göre Hasan ve Ali'nin gittiği yolun toplamı kaçtır?	6	6	6	6
H6	drive	3	6	Buna göre Hasan Ali'den kaç fazla kilometre sürmüştür?	Buna göre Hasan Ali'den kaç fazla kilometre sürmüştür?	6	6	6	6
H6	cake	1	6	Problem 1: Buna göre en az ve en çok kek yiyen kişilerin arasındaki fark nedir?	Problem 1: Buna göre en az ve en çok kek yiyen kişilerin arasındaki fark nedir?	6	6	6	6
H6	cake	2	6	Problem 2: Buna göre her kekin tanesi 12 TL olduğuna göre hepsinin yediği kekin toplamı kaçtır?	Problem 2: Buna göre her kekin tanesi 12 TL olduğuna göre hepsinin yediği kekin toplamı kaçtır?	6	6	6	6
H6	cake	3	4	Problem 3: Buna göre Elif ve kübranın yedigi kekin çarpma işlerine göre tersi nedir?	Problem 3: Buna göre Elif ve kübranın yedigi kekin çarpma işlemine göre tersi nedir?	4	4	4	4
H7	drive	1	6	Buna göre 3 orkadaşın toplom gittiği km sayısı kaçtır	Buna göre 3 arkadaşın toplam gittiği km sayısı kaçtır	6	6	6	6
H7	drive	2	6	Hason Aliden ne koder km sünmüştür ?	Hasan Aliden ne kadar km sürmüştür ?	6	6	6	6
H7	drive	3	6	tason ve mer toplom km kostir?	Hasan ve Mert toplam km kaçtır?	6	6	6	6
H7	cake	1	4	Buna göre Elifin ve kübranın kek yediklerinin Kaçta kaçıdın?	Buna göre Elifin ve kübranın kek yediklerinin Kaçta kaçıdır?	6	6	6	6
H7	cake	2	6	Buna göre Elif, Mert, ve Kübranın yediklerinin toplamı kaçtır?	Buna göre Elif, Mert, ve Kübranın yediklerinin toplamı kaçtır?	6	6	6	6
H7	cake	3	6	Elif meitten ne kadar doha falla yemiş tis	Elif mertten ne kadar daha fazla yemiştir	6	6	6	6
H8	drive	1	6	Buna göre kim daha fazla kim gitmiştir?	Buna göre kim daha fazla km gitmiştir?	6	6	6	6
H8	drive	2	6	Bu araç 100km bir litre yakıyorsa ve benzinin litresi 40 TL ise hangisi daha fazla para ödemiştir?	Bu araç 100km bir litre yakıyorsa ve benzinin litresi 40 TL ise hangisi daha fazla para ödemiştir?	5	5	5	5
H8	drive	3	6	Bu araçta 40km bin, mola veriyorlarmış, molalan ise 30dkdir buna göre Varacaklar	Bu araçta 40km bir mola veriyorlarmış, molalar ise 30dkdir buna göre varacakları noktaya geldiklerinde mola sürelerinin toplamı ne kadar sürer?	1	2	6	6
H8	cake	1	6	Rekin bir dilini 1.5 +1 dir, Buna göre.. Elif, Mart ve Kök-coma 385 tl si vorso geriye kaç leri kalır?	Kekin bir dilini 15 TL dir, Buna göre Elif, Mert ve Kübra'nın 385 tl si varsa geriye kaç tl leri kalır?	6	6	6	6
H8	cake	2	6	Elif, Mert ve Kübra'dan kaç fazla dilim kek yemiş- tic?	Elif, Mert ve Kübra'dan kaç fazla dilim kek yemiştir?	6	6	6	6
H8	cake	3	6	Bukakin fazla dilim alımına göre indirim vardın. 2 dilim alana %:25 3 tilim alara %40 Le dilim alana ise 01080 indirim vardırı Kekin dilimi 20 liradır. Buna görer kim daha fazla indirına almıştır.	Bu kekin fazla dilim alımına göre indirim vardır. 2 dilim alana %25 3 dilim alana %40 4 dilim alana ise %50 indirim vardır. Kekin dilimi 20 liradır. Buna görer kim daha fazla indirim almıştır.	6	6	6	6
J1	drive	1	2	Ali, Hasan ve Mert gittikleri tatilden geri dönmektedirler. Herkes sırasıyla dönüşümlü kullanmışlardır. Mert, Hasan'dan 240 km az araba sürmüştür. Hasan, Ali'nin sürdüğü miktarın 9 katı kadar araba sürmüştür Ali 80 km araba sürmüştür"	Ali, Hasan ve Mert gittikleri tatilden geri dönmektedirler. Herkes sırasıyla dönüşümlü kullanmışlardır. Mert, Hasan'dan 240 km az araba sürmüştür. Hasan, Ali'nin sürdüğü miktarın 9 katı kadar araba sürmüştür Ali 80 km araba sürmüştür"	2	2	2	2
J1	drive	2	6	Hasan kaç km araba sürmüştür	Hasan kaç km araba sürmüştür	6	6	6	6
J1	drive	3	4	Toplam kaç kg sürmüşlerdir.	Toplam kaç kg sürmüşlerdir.	4	4	4	4
J1	cake	1	6	Elif, Mert ve Kübra birlikte pasta almışlardır. Herkes kendisine yere bilecek kadar almıştır. Keki 8 eşit parçayı ayırmışlardır. Elif kekin 4/8'ini, Mert 2/8'ini ve Kübra ise 2/8'ini yemiştir. Buna göre Elif bu kelin yüzde kaçını yemiştif.	Elif, Mert ve Kübra birlikte pasta almışlardır. Herkes kendisine yetebilecek kadar almıştır. Keki 8 eşit parçayı ayırmışlardır. Elif kekin 4/8'ini, Mert 2/8'ini ve Kübra ise 2/8'ini yemiştir. Buna göre Elif bu kekin yüzde kaçını yemiştir.	6	6	6	6
J1	cake	2	6	Elifin yediği kekin, Mertin yediği kekin farkını yüz delik şeklinde bulunuz	Elifin yediği kekin, Mertin yediği kekin farkını yüzdelik şeklinde bulunuz	6	6	6	6
J1	cake	3	4	Kübra kekin 2/8'ini degilde 5/8'ini yeseydi Mert'in yediği kek miktarı ile arasındaki farkın yüz delik gösterimini bulunuz	Kübra kekin 2/8'ini degilde 5/8'ini yeseydi Mert'in yediği kek miktarı ile arasındaki farkın yüzdelik gösterimini bulunuz	6	6	6	6
J10	drive	1	6	Mert, Hasandan 240 km az araba sürmüştür. Hasan, Ali'nin sürdüğü miktarın 9 katı kadar araba sürmüştür, Ali ise 80 km araba sürmüştür, Verilen bilgilere göre büyükten küçüğe doğru sıralayınız.	Mert, Hasandan 240 km az araba sürmüştür. Hasan, Ali'nin sürdüğü miktarın 9 katı kadar araba sürmüştür, Ali ise 80 km araba sürmüştür, Verilen bilgilere göre büyükten küçüğe doğru sıralayınız.	6	6	6	6
J10	drive	2	4	Ment 240 km araba sürmüştür Ali, ise 80 km. araba Sürmüştür. Buna göre toplamda nekadar araba sürmüştür.	Mert 240 km araba sürmüştür Ali ise 80 km araba sürmüştür. Buna göre toplamda ne kadar araba sürmüştür.	6	6	6	6
J10	drive	3	2	Mert Hasandan 240 km az araba sürmüştür - Hasan Alinin sürdüğü miktarın 9 katı kadar ana surmüştür, Ali ise 80 km anaba sürmüştür, buna göre sıralama yaparsak Baştan 2. kim olmuştur?	Mert Hasandan 240 km az araba sürmüştür. Hasan Ali'nin sürdüğü miktarın 9 katı kadar ana sürmüştür, Ali ise 80 km araba sürmüştür, buna göre sıralama yaparsak baştan 2. kim olmuştur?	6	6	6	6
J10	cake	1	4	Problem 1: 4/8, 2/8, 2/8 verilen kesinlerin küçükten büyüğe doğru sıralayınız.	4/8, 2/8, 2/8 verilen kesirlerin küçükten büyüğe doğru sıralayınız.	4	4	6	4
J10	cake	2	6	Problem 2: 18 eşit parçaya ayrılan bir kekin, 4/8'ini Elif yemiştir Mert 2/8'ini yemiştir. Buna göre geriye kalan kekin kaçta kaçı kalmıştır?	8 eşit parçaya ayrılan bir kekin, 4/8'ini Elif yemiştir Mert 2/8'ini yemiştir. Buna göre geriye kalan kekin kaçta kaçı kalmıştır?	4	4	6	6
J10	cake	3	4	Problem 3: 4/8'ini Elif, 2/8'ini Kübra yemiştir buna göre verilen kesinlerin Ondalık halını sırayla yazın.	4/8'ini Elif, 2/8'ini Kübra yemiştir buna göre verilen kesirlerin ondalık halini sırayla yazın.	6	6	6	6
J11	drive	1	6	Ali, Hasan ve Mert aynı arabayla tatil için gittikleri geziden geri dönmekteler. Dönüşümlü olarak araba sürmektelerdir. Mert, Hasan'dan 240 km az araba sürmüş, Hasan, Ali'nin 9 katı kadar araba sürmüştür. Ali 80 km araba sürdüğüne göre En fazla kim araba sürmüştür?	Ali, Hasan ve Mert aynı arabayla tatil için gittikleri geziden geri dönmekteler. Dönüşümlü olarak araba sürmektelerdir. Mert, Hasan'dan 240 km az araba sürmüş, Hasan, Ali'nin 9 katı kadar araba sürmüştür. Ali 80 km araba sürdüğüne göre En az kim araba sürmüştür?	6	6	6	6
J11	drive	2	2	Ali Hasan ve Mert aynı arabayla tatile gidiyorlar. Geri dönerken dönüşlü araba sürmüşler där. Mert, Hasan'dan 240 km az araba sürmüştür. Hasan, Ali'nin sürdüğü miktarın 9 katı kadar arba sürmüştür. Ali 80 km sürmüştür. Buna göre Hasan ne kadar araba sürmüştür?	Ali Hasan ve Mert aynı arabayla tatile gidiyorlar. Geri dönerken dönüşlü araba sürmüşler där. Mert, Hasan'dan 240 km az araba sürmüştür. Hasan, Ali'nin sürdüğü miktarın 9 katı kadar arba sürmüştür. Ali 80 km sürmüştür. Buna göre Hasan ne kadar araba sürmüştür?	6	6	6	6
J11	drive	3	6	Ali, Hasan ve Mert aynı arabayla tatile gidiyorlar. Geri dönerken dönüşümlü araba sürmüşlerdir. Mert Hasan'dan 240 Km az araba sürmüştür. Hasan, Ali'nin sürdüğü miktarın 9 katı kadar araba sürmüştür. Buna göre Mert ne kadar araba sürmüştür.?	Ali, Hasan ve Mert aynı arabayla tatile gidiyorlar. Geri dönerken dönüşümlü araba sürmüşlerdir. Mert Hasan'dan 240 Km az araba sürmüştür. Hasan, Ali'nin sürdüğü miktarın 9 katı kadar araba sürmüştür. Buna göre Mert ne kadar araba sürmüştür.?	5	5	5	5
J11	cake	1	6	Bir kek 8 eşit parçaya ayrılmıştır. Elif kekin 4/8 ini, Mert 2/8 ini ve Kübra 1/8 ini yemiştir Buna göre en çok kim yemiştir?	Bir kek 8 eşit parçaya ayrılmıştır. Elif kekin 4/8 ini, Mert 2/8 ini ve Kübra 2/8 ini yemiştir Buna göre en çok kim yemiştir?	6	6	6	6
J11	cake	2	2	Bir Kek 8 eşit porpaya ayrılmıştır. Elif kekin 4/8, Mert 2/8 ini yemistin Kalan, Kübra yemiştir. Buna gore kübra kekin yüzde	Bir Kek 8 eşit parçaya ayrılmıştır. Elif kekin 4/8, Mert 2/8 ini yemistir. Kalanı Kübra yemiştir. Buna gore kübra kekin yüzde	2	6	6	6
J11	cake	3	6	Bir kek 8 eşit parçaya ayrılmış Mert kekin 2/8 ini, Kübra 1/8 ini yemiştir Elif kekini yerken yarısını yere düşürmüştür, Buna göre Elif nekadar yemek ister?	Bir kek 8 eşit parçaya ayrılmış Mert kekin 2/8 ini, Kübra 2/8 ini yemiştir Elif kekini yerken yarısını yere düşürmüştür, Buna göre Elif nekadar yemek ister?	3	3	3	3
J12	drive	1	6	Üstte verilen bilgiye göre Mert kaç km yol gitmiştir?	Üstte verilen bilgiye göre Mert kaç km yol gitmiştir?	6	6	6	6
J12	drive	2	6	Ali ile Hasan'ın gittiği yolun toplamı kaçtır?	Ali ile Hasan'ın gittiği yolun toplamı kaçtır?	6	6	6	6
J12	drive	3	6	Buna göre arabayla gittikleri yol kaç km'dir?!	Buna göre arabayla gittikleri yol kaç km'dir?	6	6	6	6
J12	cake	1	6	Problem 1: Mert ile Elif'in yediği toplam pasta miktarı nedir?	Problem 1: Mert ile Elif'in yediği toplam pasta miktarı nedir?	6	6	6	6
J12	cake	2	4	Problem 2: Bu 8 dilimlik kekten Elif, Mert, Kübra, kaç dilim yediği verilmiştir fakat Kübra yiyeceği kek miktarının yarısını yediğine göre kalan kek miktarı kaç olur	Problem 2: Bu 8 dilimlik kekten Elif, Mert, Kübra, kaç dilim yediği verilmiştir fakat Kübra yiyeceği kek miktarının yarısını yediğine göre kalan kek miktarı kaç olur	6	6	6	6
J12	cake	3	3	Problem 3: Toplam kekin yarısı 4/8 ise bu kek sayısının yarısı kaç olur	Problem 3: Toplam kekin yarısı 4/8 ise bu kek sayısının yarısı kaç olur	4	6	4	6
J13	drive	1	6	Buna göre Hasan kaç km araba sürmüştür?	Buna göre Hasan kaç km araba sürmüştür?	6	6	6	6
J13	drive	2	3	Mert ile Hasan'ın sürdüğü km farkı kaçtır?	Mert ile Hasan'ın sürdüğü km farkı kaçtır?	3	3	3	3
J13	drive	3	6	Mert, Hasan ve Ali'nin sürdüğü km toplamı kaçtır?	Mert, Hasan ve Ali'nin sürdüğü km toplamı kaçtır?	6	6	6	6
J13	cake	1	6	Problem 1: En fazla keki kim yemiştir? Sıralayınız.	Problem 1: En fazla keki kim yemiştir? Sıralayınız.	6	6	6	6
J13	cake	2	6	Problem 2: Mert kekin yüzde kaçını yemiştir?	Problem 2: Mert kekin yüzde kaçını yemiştir?	6	6	6	6
J13	cake	3	6	Problem 3: Elifin yediği kekin Yüzdesi ile Kübra'nın yediği kekin yüzdesinin toplamı kaçtır?	Problem 3: Elifin yediği kekin Yüzdesi ile Kübra'nın yediği kekin yüzdesinin toplamı kaçtır?	6	6	6	6
J2	drive	1	3	Ali, Hasan ve Mert birlikte aynı arabayla hafta sonu tatil için gittikleri geziden geri dönmektedir. Dönüşümlü olarak arabaya kullanarak yolculuğu tamamlamışlardır. Mert Hasan'dan 240 km az araba sürmüştür. Hasan Ali'nin sürdüğü miktarın 9 katı kadar araba sürmüştür. Ali 80 km araba sürmüştür. Buna göre Ali kaç km araba sürmüştür?	Ali, Hasan ve Mert birlikte aynı arabayla hafta sonu tatil için gittikleri geziden geri dönmektedir. Dönüşümlü olarak arabaya kullanarak yolculuğu tamamlamışlardır. Mert Hasan'dan 240 km az araba sürmüştür Hasan Ali'nin sürdüğü miktarın 9 katı kadar araba sürmüştür. Ali 80 km araba sürmüştür. Buna göre Ali kaç km araba sürmüştür?	3	3	3	3
J2	drive	2	6	Ali, Hasan ve Mert birlikte aynı arabayla hafta sonu tatili için gittikleri geziden geri dönmektedir. Dönüşümlü olarak arabaya kullanarak yolculuğu tamamlamışlardır. Mert Hasan'dan 240 km az araba sürmüştür. Hasan Ali'nin sürdüğü miktarın 9 katı kadar araba sürmüştür. Ali 80 km araba sürmüştür buna göre toplam kaç km yol sürmüştür?	Ali, Hasan ve Mert birlikte aynı arabayla hafta sonu tatili için gittikleri geziden geri dönmektedir. Dönüşümlü olarak arabaya kullanarak yolculuğu tamamlamışlardır. Mert Hasan'dan 240 km az araba sürmüştür. Hasan Ali'nin sürdüğü miktarın 9 katı kadar araba sürmüştür. Ali 80 km araba sürmüştür buna göre toplam kaç km yol sürmüştür?	6	6	6	6
J2	drive	3	6	Yukarıdaki paragrafa göre Hasanın sürdüğü miktar ne kadardır,	Yukarıdaki paragrafa göre Hasan'ın sürdüğü miktar ne kadardır.	6	6	6	6
J2	cake	1	6	Elif kekin 4/8 'ini, semistir Mert ise 2/8 'ini yemistir bu na göre Elif merten kaç dilim fazla yemistir ?	Elif kekin 4/8 'ini yemistir Mert ise 2/8 'ini yemistir buna göre Elif merten kaç dilim fazla yemistir ?	6	6	6	6
J2	cake	2	6	Bir kek 8 eşit parcaya ayrılmıştır. Elif kekin 4/8 'ini Mert 2/8 'ini kübra ise 2/8 'ini yemiştir. Buna göre bu 3 arkadas toplam Kaç dilim kek yemiştir?	Bir kek 8 eşit parcaya ayrılmıştır. Elif kekin 4/8 'ini Mert 2/8 'ini kübra ise 2/8 'ini yemiştir. Buna göre bu 3 arkadas toplam Kaç dilim kek yemiştir?	6	6	6	6
J2	cake	3	5	Bir ket 8 esik parçaya ayrılmıştır. Elif kekin 4/8 ini Mert 2/8 ini ve Kübra ise 2/8 ini semiştir. Kübra 2/8 ini Yediğinde kek kaç dilim kalmaktadır?	Bir kek 8 eşit parçaya ayrılmıştır. Elif kekin 4/8'ini Mert 2/8 ini ve Kübra ise 2/8 ini yemiştir. Kübra 2/8 ini Yediğinde kek kaç dilim kalmaktadır?	6	6	6	6
J3	drive	1	6	Ali, hosan ve mert Aynı acabayda beraber hafta SOOU gittikleri tatilden dönerker Dönuşumlü olarats acaba Ahullanarak yolculuğu tamamlamışlardır Mert, hasandan 240 tkm 92 acaba Sürmüştür hossan, Ali'nin sürdüğü miktarın katı kadar ocaba Sürmüştün, Ali ise 80 km araba sürmüştür buna göre toplom kaç km araba sürmüşlerdir?	Ali, hasan ve mert Aynı arabayda beraber hafta sonu gittikleri tatilden dönerken Dönüşümlü olarak araba kullanarak yolculuğu tamamlamışlardır Mert, hasan'dan 240 km az araba Sürmüştür hasan, Ali'nin sürdüğü miktarın 9 katı kadar araba Sürmüştür, Ali ise 80 km araba sürmüştür buna göre toplam kaç km araba sürmüşlerdir?	6	5	6	6
J3	drive	2	6	Ali, hasan ve. Mertin kaç km sürdüğünü büyükten küçüğe doğru Sıralayınız.	Ali, hasan ve Mertin kaç km sürdüğünü büyükten küçüğe doğru Sıralayınız.	6	6	6	6
J3	drive	3	6	Hasan aliden ne hador fazla sürmüştür?	Hasan aliden ne kadar fazla sürmüştür?	6	6	6	6
J3	cake	1	6	bir kek 8 eşit parçaya ayırıldı. Kekin 4/8 ini elif 2/8 ini mert 2/8 ini kübra yemiştir buna göre Elif mertden ne kadar fazla yemiştir?	bir kek 8 eşit parçaya ayırılır. Kekin 4/8'ini elif 2/8'ini mert 2/8'ini kübra yemiştir buna göre Elif mertden ne kadar fazla yemiştir?	6	6	6	6
J3	cake	2	6	8 eşit parçaya ayrılan kekin 4/8 ini elif 2/8 ini mert 2/8 ini kübra yemiştir, kimin daha çok yediğini büyükten küçüğe doğru sıralayınız, eğer eşitseler eşittir işareti koyun.	8 eşit parçaya ayrılan kekin 4/8'ini elif 2/8'ini mert 2/8'ini kübra yemiştir, kimin daha çok yediğini büyükten küçüğe doğru sıralayınız, eğer eşitseler eşittir işareti koyun.	6	6	6	6
J3	cake	3	6	8 eşit parçaya ayrılan kekin 4/8 ini elif 2/8 ini mert 2/8 ini kübra yemiştir buna göre en çok kim kek yemiştir?	8 eşit parçaya ayrılan kekin 4/8'ini elif 2/8'ini mert 2/8'ini kübra yemiştir buna göre en çok kim kek yemiştir?	6	6	6	6
J4	drive	1	6	Yukarıda verilenlere göre Ali, Mert ve Hasanın toplam kaç kilometre araba sürdüğünü bulunuz daha sonra bulduğunuz yol, kilometre miktarını 3 arkadaşa eşit olarak bölünüz, her bir kişiye kaç kilometre düştüğünü bulunuz.	Yukarıda verilenlere göre Ali, Mert ve Hasanın toplam kaç kilometre araba sürdüğünü bulunuz daha sonra bulduğunuz yol, kilometre miktarını 3 arkadaşa eşit olarak bölünüz, her bir kişiye kaç kilometre düştüğünü bulunuz.	6	6	6	6
J4	drive	2	6	Ali, Mert ve Hasan tatile giderken ve dönerken aynı yolu kullanmıştır. Buna göre gidiş ve dönüşte toplam kaç kilometre kullanmışlardır.	Ali, Mert ve Hasan tatile giderken ve dönerken aynı yolu kullanmıştır. Buna göre gidiş ve dönüşte toplam kaç kilometre kullanmışlardır.	6	6	6	6
J4	drive	3	6	Hasan Ali'den kaç kilometre fazla araba sürmüştür?	Hasan Ali'den kaç kilometre fazla araba sürmüştür?	6	6	6	6
J4	cake	1	4	Elif, Mert ve Kübra'nın yedikleri kekin aritmetik ortalaması kaçtır?	Elif, Mert ve Kübranın yedikleri kekin aritmetik ortalaması kaçtır?	6	6	6	6
J4	cake	2	6	Elif ve Mert'in yediği keklerin toplamı, Kübra'nın yediği kekten ne kadar fazladır? (Kesir ile ifade ediniz)	Elif ve Mert'in yediği keklerin toplamı Kübra'nın yediği kekten ne kadar fazladır? (Kesir ile ifade ediniz)	6	6	6	6
J4	cake	3	0			0	0	0	0
J5	drive	1	6	Problem 1: Hasanın sürdüğü yol Ali ve Mertin Sürdüğü yoldan kaç km fazla sürdü?	Problem 1: Hasanın sürdüğü yol Ali ve Mertin Sürdüğü yoldan kaç km fazla sürdü?	6	6	6	6
J5	drive	2	6	Problem 2: Mert kaç km yol gitti?	Problem 2: Mert kaç km yol gitti?	6	6	6	6
J5	drive	3	6	Problem 3: Mert Ali Hasan toplamda Las mm yol gitmiştir? Ferrin.	Mert Ali Hasan toplamda kaç mm yol gitmiştir?	6	6	6	6
J5	cake	1	6	Merfim yediği kek elifin yediği kekin kaçta karşıdır?	Mert'in yediği kek elif'in yediği kekin kaçta kaçıdır?	6	6	6	6
J5	cake	2	3	Elifin yediği pasta bütün pastanın kaçta kaçıdır?	Elifin yediği pasta bütün pastanın kaçta kaçıdır?	3	3	3	3
J5	cake	3	6	Mert in yediği pasta ile kübranın yediği Pastanın toplamı bütün Pastanın yüzde kaçıdır?	Mert in yediği pasta ile kübranın yediği Pastanın toplamı bütün Pastanın yüzde kaçıdır?	6	6	6	6
J6	drive	1	6	En çok araba süren kişiden, en az süren kisiye doğru sıralayın.	En çok araba süren kişiden, en az süren kişiye doğru sıralayın.	6	6	6	6
J6	drive	2	4	Veri grubunun aritmetik ortalamasını bulun.	Veri grubunun aritmetik ortalamasını bulun.	6	6	6	6
J6	drive	3	4	Hasan ve-Mert'in gittiği yolun toplamından, Ali'nin gittiği yolu çıkarırsak, çıkan sonuç 3 arkadaşa eşit bölünebilir mi? Bölünebilirse bir kişiye düşen mesafe kaç kilometre olur?	Hasan ve Mert'in gittiği yolun toplamından, Ali'nin gittiği yolu çıkarırsak, çıkan sonuç 3 arkadaşa eşit bölünebilir mi? Bölünebilirse bir kişiye düşen mesafe kaç kilometre olur?	6	6	6	6
J6	cake	1	6	Elif'in yediği kekin miktarı ile, Kübra'nın yediği miktar arasındaki fark?	Elif'in yediği kekin miktarı ile Kübra'nın yediği miktar arasındaki fark?	6	6	6	6
J6	cake	2	6	3 Arkadaşın yediği kek miktarının toplamı kaçtır.	3 Arkadaşın yediği kek miktarının toplamı kaçtır.	6	6	6	6
J6	cake	3	0			0	0	0	0
J7	drive	1	4	Hasan Ali'nin sardağa miktarın 9 katı kadar araba sürmüştür. Ali 80 km aroba sturmüş Mert 160 km sürmüştür buna ağçe Hasen kacilem caube sürmüştür.	Hasan Ali'nin sürdüğü miktarın 9 katı kadar araba sürmüştür. Ali 80 km araba sürmüş Mert 160 km sürmüştür buna göre Hasan kaç km araba sürmüştür.	6	6	6	6
J7	drive	2	4	Ali 80 km, Mert 160 km ve Hosen ise 910 km oroba sarmüştür buna göre toplamda kala km araba kullanmışlardır.	Ali 80 km, Mert 160 km ve Hasan ise 910 km araba sürmüştür buna göre toplamda kaç km araba kullanmışlardır.	6	6	6	6
J7	drive	3	4	Ali 80 km, Mert 160 km ve Hosen Jb km oroba kullamışlardır buna apre cıkarma isleminde senu kac dur	Ali 80 km, Mert 160 km ve Hasan 910 km araba kullamışlardır buna göre çıkarma işleminde sonuç kaç olur.	4	4	4	4
J7	cake	1	6	Problem 1: 1/8, 2/8, 4/8 parçalarının toplamı kaçtır?	2/8, 2/8, 4/8 parçalarının toplamı kaçtır	4	4	6	6
J7	cake	2	5	Problem 2: Bir kek 8 eşit parçaya ayrılmıştır buna göre Mert 2/8, Kübra 4/8 'sini yemiştir. buna göre Elif kekin kaçta kaçını yemiştir.	Problem 2: Bir kek 8 eşit parçaya ayrılmıştır buna göre Mert 2/8, Kübra 2/8 'sini yemiştir. buna göre Elif kekin kaçta kaçını yemiştir.	5	5	5	5
J7	cake	3	6	Problem 3: Bir kek 8 eşit parçaya ayrılmıştır Elif kekin 1/8, Mert 2/8, Kübra ise 4/8 'ini yemiştir buna göre parçaların çıkınca kaç parça kalmıştır.	Bir kek 8 eşit parçaya ayrılmıştır Elif kekin 4/8, Mert 2/8, Kübra ise 2/8 'ini yemiştir buna göre parçaların çıkınca kaç parça kalmıştır.	6	6	6	6
J8	drive	1	6	Problem 1: Ali Hasan ve Mert birlikte aynı arabayla hafta sonu tatili için gittikleri geziden geri dönmektedirler. Dönüşümlü olarak arabayı kullanarak yolculuğu tamamlamışlardır. Mert, Hasan'dan 240 km az araba sürmüştür. Hasan Ali'nin sürdüğü miktarın 9 katı kadar araba sürmüştür. Ali 80 km araba sürmüştür. Buna göre Hasan kaçı km araba sürmüştür?	Problem 1: Ali Hasan ve Mert birlikte aynı arabayla hafta sonu tatili için gittikleri geziden geri dönmektedirler. Dönüşümlü olarak arabayı kullanarak yolculuğu tamamlamışlardır. Mert, Hasan'dan 240 km az araba sürmüştür. Hasan Ali'nin sürdüğü miktarın 9 katı kadar araba sürmüştür. Ali 80 km araba sürmüştür. Buna göre Hasan kaç km araba sürmüştür?	6	6	6	6
J8	drive	2	6	Problem 2: Mert'in kaç km araba sürdüğünü bulunuz.	Problem 2: Mert'in kaç km araba sürdüğünü bulunuz.	6	6	6	6
J8	drive	3	6	Problem 3: Hasan Ali'den kaç km fazla araba sürmüştür?	Problem 3: Hasan Ali'den kaç km fazla araba sürmüştür?	6	6	6	6
J8	cake	1	6	Bir kek 8 eşit parçaya ayrılmıştır. Elif kekin 4/8'ini, Mert 2/8'ini ve Kübra ise 2/8'ini yemiştir. Buna göre Elif, Mert ve Kübra'nın yediği kekleri küçükten büyüğe doğru sıralayınız.	Bir kek 8 eşit parçaya ayrılmıştır. Elif kekin 4/8'ini, Mert 2/8'ini ve Kübra ise 2/8'ini yemiştir. Buna göre Elif, Mert ve Kübra'nın yediği kekleri küçükten büyüğe doğru sıralayınız.	6	6	6	6
J8	cake	2	5	Elif kekin 4/8'ini yediyse Mert ve Kübra'nın yediği keklerin toplamı kaçtır?	Elif kekin 4/8'ini yediyse Mert ve Kübra'nın yediği keklerin toplamı kaçtır?	6	6	6	6
J8	cake	3	6	Mert'in yediği kekin yüzdesini bulunuz.	Mert'in yediği kekin yüzdesini bulunuz.	6	6	6	6
J9	drive	1	6	Alv, Hasarve mert birlikte aynı arabayla hafta soru tatili içir gittikleri geziden geri dönmektedirler Dönüşümlü ofara arabayı kullanarak yolculuğu tamamlamışlardı, mert, Hasan dar 240 km az araba sürmüştür Hasan alinin sör doğü miktarı 9 katı Kadar araba sürmüştür. Ali 80 lam araba sormüştür Buna göre mert nekadar araba sürmüştür	Ali, Hasan ve mert birlikte aynı arabayla hafta sonu tatili için gittikleri geziden geri dönmektedirler Dönüşümlü olarak arabayı kullanarak yolculuğu tamamlamışlardı, mert, Hasan dan 240 km az araba sürmüştür Hasan ali'nin sürdüğü miktarın 9 katı Kadar araba sürmüştür. Ali 80 km araba sürmüştür Buna göre mert ne kadar araba sürmüştür	6	6	6	6
J9	drive	2	6	üstteki metne göre hangisi daha fazla araba sürmüştür.	üstteki metne göre hangisi daha fazla araba sürmüştür.	6	6	6	6
J9	drive	3	5	üstte ki metre gone araba sürme Sürelerini Büyükten küçüğe sıralayınız.	üstte ki metne gore araba sürme sürelerini büyükten küçüğe sıralayınız.	5	5	5	5
J9	cake	1	6	Bir gün Elif ve kübra Bir kekir 4/8 daha büyük yoksa 2/8 simi daha büyük diye tartışıyor Sizce hangisi daha büyüktür	Bir gün Elif ve kübra Bir kekin 4/8 daha büyük yoksa 2/8 simi daha büyük diye tartışıyor Sizce hangisi daha büyüktür	6	6	6	6
J9	cake	2	4	Bir kek 8 eşit parçaya ayrılmıştır. Elif Kekin 4/8 ini mert 2/8 ini ve kübra ise 2/8 sini yemiştir: Ibünkarı ori dalik gösterime çevirip Küçüliten buyüge sıralayınız	Bir kek 8 eşit parçaya ayrılmıştır. Elif Kekin 4/8'ini mert 2/8'ini ve kübra ise 2/8 sini yemiştir. Bunları ondalık gösterime çevirip küçükten buyüge sıralayınız	6	6	6	6
J9	cake	3	3	Bir gün Elifin annesi Elif ve arkadaşlarına Kek veriyor Elife 4/8 merfe 2/8 ve Kübraya 2/8 sini vermiştir Si@ce Elifin annesi Adaletli bir paylaşım yapmışmıdır.	Bir gün Elifin annesi Elif ve arkadaşlarına Kek veriyor Elif'e 4/8 mert'e 2/8 ve Kübraya 2/8 sini vermiştir Sizce Elifin annesi Adaletli bir paylaşım yapmışmıdır.	6	3	3	3
K1	drive	1	6	Ali, Hasan Ve Mert'in toplam gittiği yol kaç km'dir.?	Ali, Hasan ve Mert'in toplam gittiği yol kaç km'dir?	6	6	6	6
K1	drive	2	5	Ali, Hasan ve mert döndükleri değilde tatile gittile(eri yol kaç km'dir?	Ali, Hasan ve mert döndükleri değilde tatile gittikleri yol kaç km'dir?	5	5	5	5
K1	drive	3	2	Ali, hasan yada mert tek bir kişi alabas? sürseddi tatilde yaptıklarl you kaç km olurdu?	Ali, hasan ya da mert tek bir kişi arabayı sürseydi tatilde yaptıkları yol kaç km olurdu?	6	6	6	6
K1	cake	1	6	Problem 1: Bu va bişinin toplam kaç kak jenistir	Bu üç kişinin toplam kaç kek yemiştir.	6	6	6	6
K1	cake	2	3	Problem 2. Bu soruyu Sembollerle gösteriniz?	Problem 2. Bu soruyu Sembollerle gösteriniz?	3	3	3	3
K1	cake	3	3	Problem 3: Hangisi buncardan daha fazla eşit Jemişlerdir.	Hangisi bunlardan daha fazla eşit yemişlerdir.	6	6	6	4
K2	drive	1	6	Buna göre geri dönmek için ne kadar yol gitmiştir.	Buna göre geri dönmek için ne kadar yol gitmiştir.	6	6	6	6
K2	drive	2	5	Buna göre bu kadar yol gittiyse Daraba benzini fullemek içinn kaç para vermiştir.	Buna göre bu kadar yol gittiyse araba benzini fullemek için kaç para vermiştir.	5	5	5	5
K2	drive	3	6	Alinin arkadaşları gene geziye gidecek lermis gene bukadar daha yol gittiler ama bide üstüne 100 km daha gitmiş. Buna göre şimdi nekadar daha yol gitmiştir?	Alinin arkadaşları gene geziye gideceklermis gene bukadar daha yol gittiler ama bide üstüne 100 km daha gitmiş. Buna göre şimdi nekadar daha yol gitmiştir?	6	6	6	6
K2	cake	1	6	Buna göre kek sayısının kalanı kaçtır?	Buna göre kek sayısının kalanı kaçtır?	6	6	6	6
K2	cake	2	6	Bir dilimj 40 gram olduna göre Akekin tarnami kaç gramdır?	Bir dilimi 40 gram olduna göre 1 kekin tamamı kaç gramdır?	6	6	6	6
K2	cake	3	6	Elif en çok kek dilimiyiyen olduğu için Mert ve Kübra elifle eşit yemeleri için Ama Bu sefer hesit parçaya ayrılmış kekvar. Busefer Mert 2/4 kübra'nın kaç dilim kek yemesi gerekir?	Elif en çok kek dilimi yiyen olduğu için Mert ve Kübra elifle eşit yemeleri için Ama Bu sefer 4 eşit parçaya ayrılmış kek var. Bu sefer Mert 2/4 kübra'nın kaç dilim kek yemesi gerekir?	6	6	6	6
K3	drive	1	6	Toplam kaç km sürmüşlerdir?	Toplam kaç km sürmüşlerdir?	6	6	6	6
K3	drive	2	6	Hasan kaç km araba sürmüştür?	Hasan kaç km araba sürmüştür?	6	6	6	6
K3	drive	3	6	En fazla araba süren kimdir?	En fazla araba süren kimdir?	6	6	6	6
K3	cake	1	6	Elif ve Mert toplam kekin kaçta kaçını yemişlerdir?	Elif ve Mert toplam kekin kaçta kaçını yemişlerdir?	6	6	6	6
K3	cake	2	6	Mert ve Kübra kekin yüzde kaçını yemişlerdir?	Mert ve Kübra kekin yüzde kaçını yemişlerdir?	6	6	6	6
K3	cake	3	6	Cocuklar kekten kaç dilim yerlerse çeyrek yemiş olurlar?	Cocuklar kekten kaç dilim yerlerse çeyrek yemiş olurlar?	6	6	6	6
K4	drive	1	6	Hasan kaç km araba sürmüştür?	Hasan kaç km araba sürmüştür?	6	6	6	6
K4	drive	2	6	Mert kaç kilometre sürmüştür?	Mert kaç kilometre sürmüştür?	6	6	6	6
K4	drive	3	6	Hasan ile mertin sürdüğü kilometre toplamı kaçtır?	Hasan ile mertin sürdüğü kilometre toplamı kaçtır?	6	6	6	6
K4	cake	1	6	3 kişinin yediği Parçalar pastayı tam barmı?	3 kişinin yediği Parçalar pastayı tamlarmı?	6	6	6	6
K4	cake	2	2	3 kişi toplam kekin kaçta kaçını yemiştir yemiştir	3 kişi toplam kekin kaçta kaçını yemiştir?	6	6	6	6
K4	cake	3	2	3 kişinin toplam beligi kek, yuzdelik gösterimle gösterin	3 kişinin toplam yediği keki, yüzdelik gösterimle gösterin	6	6	6	6
K5	drive	1	6	Buna göre Ali, Hasan ve Mert'in sürdüğü yol miktarını büyükten küçüğe sıralayınız.	Buna göre Ali, Hasan ve Mert'in sürdüğü yol miktarını büyükten küçüğe sıralayınız.	6	6	6	6
K5	drive	2	6	Buna göre Mert kaç km araba sürmüştür?	Buna göre Mert kaç km araba sürmüştür?	6	6	6	6
K5	drive	3	6	Buna göre hepsinin sürdüğü toplam km kaçtır?	Buna göre hepsinin sürdüğü toplam km kaçtır?	6	6	6	6
K5	cake	1	6	Buna göre bu üç arkadaş kekin kaçta kaçını yemiştir?	Buna göre bu üç arkadaş kekin kaçta kaçını yemiştir?	6	6	6	6
K5	cake	2	6	Buna göre Mert kekin % kaçını yemiştir?	Buna göre Mert kekin % kaçını yemiştir?	6	6	6	6
K5	cake	3	6	Buna göre eğer Kübra 6/8'ini yeseydi ilk sonuç ile şimdiki sonuç arasındaki fark kaç olurdu?	Buna göre eğer Kübra 6/8'ini yeseydi ilk sonuç ile şimdiki sonuç arasındaki fark kaç olurdu	4	4	4	4
K6	drive	1	4	Problem 1: Eğer Mert, Hason'den daha fazla arabes sürseydi Sonuç kaç km artardı?	Eğer Mert, Hasan'dan daha fazla araba sürseydi Sonuç kaç km artardı?	5	5	5	5
K6	drive	2	4	Problem 2: Eğer Ali - Mert'in sürdüğü km'den 2 katı daha fazla Sürseydi Hason ile Al; arasındaki yol forkı kaç lem olurdu?	Eğer Ali, Mert'in sürdüğü km'den 2 katı daha fazla Sürseydi Hasan ile Ali arasındaki yol farkı kaç km olurdu?	6	6	6	6
K6	drive	3	4	Problem 3: Buna gore hepsinin toplamını yuzdelit gosterimle ifade ediniz.	Buna gore hepsinin toplamını yuzdelik gösterimle ifade ediniz.	4	4	4	4
K6	cake	1	4	Buna göre Elif, Mert ve Kübranın yediği kek parçalarının toplamını ondalık gösterimle ifade ediniz.	Buna göre Elif, Mert ve Kübranın yediği kek parçalarının toplamını ondalık gösterimle ifade ediniz.	6	6	6	6
K6	cake	2	4	Buna göre Bir kişi daha eklenseydi hepsinin toplamı 1'den fazla mı olur, 1'den az mı?	Buna göre Bir kişi daha eklenseydi hepsinin toplamı 1'den fazla mı olur, 1'den az mı?	6	5	6	5
K6	cake	3	6	Buna göre hepsinin yediği kek parçaları kaçtır?	Buna göre hepsinin yediği kek parçaları kaçtır?	6	6	6	6
K7	drive	1	6	Hasan is kaç km daha araba sürmesi torbiu	Hasan kaç km araba sürmüştür	5	5	6	6
K7	drive	2	6	Hasan ve Mert'in sürdüğü km sayısı kaçtı?	Hasan ve Mert'in sürdüğü km sayısı kaçtı?	6	6	6	6
K7	drive	3	6	Hasan Ali'den kaç km fazla araba sürmüştür?	Hasan Ali'den kaç km fazla araba sürmüştür?	6	6	6	6
K7	cake	1	6	Elif ve Kübra kekin kaçta kaçını yemiştir?	Elif ve Kübra kekin kaçta kaçını yemiştir?	6	6	6	6
K7	cake	2	6	Elif kekin kaç dilimini yemezse 3 arkadaşın yedikleri kek sayısı eşit olur?	Elif kekin kaç dilimini yemezse 3 arkadaşın yedikleri kek sayısı eşit olur?	6	6	6	6
K7	cake	3	6	Kek 8 eşit parçaya ayrılmış ise bu üç arkadaş grubu kekin tamamını yemişmidir?	Kek 8 eşit parçaya ayrılmış ise bu üç arkadaş grubu kekin tamamını yemişmidir.	6	6	6	6
K8	drive	1	6	Ali, hasan ve mertin toplam kaç km yol gitmiştir?	Ali, hasan ve mertin toplam kaç km yol gitmiştir?	6	6	6	6
K8	drive	2	6	hason Alinin sürdüğü miktar 15 katı Olsaydı kaç km Araba sürmüştür?	hasan Alinin sürdüğü miktar 15 katı olsaydı kaç km Araba sürmüştür?	6	6	6	6
K8	drive	3	6	Meıt, hasandon 240 km daha Fazla süiseydi kah kan gitmiştir	Mert, hasandan 240 km daha Fazla sürseydi kaç km gitmiştir	6	6	6	6
K8	cake	1	6	Bu 3 arkadaşın toplam yediği kek kaçtır?	Bu 3 arkadaşın toplam yediği kek kaçtır?	6	6	6	6
K8	cake	2	3	Mert ile Kübranın yediği kek sayısı sizce aynı mıdır? nedeninizi yazın.	Mert ile Kübranın yediği kek sayısı sizce aynı mıdır? nedeninizi yazın.	3	3	3	3
K8	cake	3	4	Bu kek 10 parçaya ayrılırsa hepsi kaç Parça kek yer? fikirlerinizi yazınız.	Bu kek 10 parçaya ayrılırsa hepsi kaç Parça kek yer? fikirlerinizi yazınız.	5	5	5	5
K9	drive	1	6	Hasan kaç km sürmüştür.	Hasan kaç km sürmüştür.	6	6	6	6
K9	drive	2	6	En az araba süten kimdir.	En az araba süren kimdir.	6	6	6	6
K9	drive	3	6	Hasan Merttin kaç katı	Hasan Mert'in kaç katı	6	6	6	6
K9	cake	1	6	Buna göre Elif, Mert ve Kübra ne kadar yemiştir.	Buna göre Elif, Mert ve Kübra ne kadar yemiştir.	3	3	3	3
K9	cake	2	3	Hangi kişi en az yemiştir.	Hangi kişiler aynı yemiştir.	6	6	6	3
K9	cake	3	6	Elif Mert'ten kaç fazla yemiştir.	Elif Mert'ten kaç fazla yemiştir.	6	6	6	6
M1	drive	1	6	Hasan Ali'nin sürdüğü Miktatın 9 katı kadar araba sürmüştür Ali 80 km araba sürdüğüne göre hasan kaç km araba Sürmüştür?	Hasan Ali'nin sürdüğü miktarın 9 katı kadar araba sürmüştür Ali 80 km araba sürdüğüne göre hasan kaç km araba sürmüştür?	6	6	6	6
M1	drive	2	6	Mert hasan dan 240 km az araba Sürmüştür. buna göre Mertlin araba sürdüğü km Miktarını bulunuz?	Mert hasan'dan 240 km az araba sürmüştür. buna göre Mert'in araba sürdüğü km miktarını bulunuz?	6	6	6	6
M1	drive	3	6	Mert, hasan ve Ali'nin gittikleri yal kaç km'dir?	Mert, hasan ve Ali'nin gittikleri yal kaç km'dir?	6	6	6	6
M1	cake	1	6	Elif ve Mert'in yedikleri kek dilimlerinin farkı kaçtır?	Elif ve Mert'in yedikleri kek dilimlerinin farkı kaçtır?	6	6	6	6
M1	cake	2	6	En fazla kek yiyen kişi kimdir?	En fazla kek yiyen kişi kimdir?	6	6	6	6
M1	cake	3	6	Elif, mert ve kübra'nın yedikleri kek dilimi sayısına göre büyükten Küçüğe Doğru sıralayın.2.	Elif, mert ve kübra'nın yedikleri kek dilimi sayısına göre büyükten Küçüğe Doğru sıralayınız.	6	6	6	6
M10	drive	1	6	Buna göre en az araba süren kişi kimdir	Buna göre en az araba süren kişi kimdir.	6	6	6	6
M10	drive	2	6	Bu metoe göre Hasan kaa km araba Särmústar?	Bu metne göre Hasan kaç km araba sürmüştür?	6	6	6	6
M10	drive	3	6	Buna göre bu arkadaşların tatilden dönerken gittikleri Mesafe kaçtır.	Buna göre bu arkadaşların tatilden dönerken gittikleri mesafe kaçtır.	6	6	6	6
M10	cake	1	6	Buna göre bu üç arkadaşın Toplam yediği kek sayısı ne kadardır?	Buna göre bu üç arkadaşın Toplam yediği kek sayısı ne kadardır?	6	6	6	6
M10	cake	2	6	Bu keklerden herkese eşit paylaştırılırsa herkes kaç dilim kek yer?	Bu keklerden herkese eşit paylaştırılırsa herkes kaç dilim kek yer?	6	5	6	5
M10	cake	3	6	Herkes bu kekten eşit yeseydi geriye kaç tane kek kalırdı?	Herkes bu kekten eşit yeseydi geriye kaç tane kek kalırdı?	5	5	5	5
M11	drive	1	6	Problem 1: Ali, Hasan ve Mert birlikte aynı arabayla hafta sonu tatili için gittikleri geziden geri dönmektedirler. Dönüşümlü olarak arabayı kullanarak yolculuğu tamamlamışlardır. Mert, Hasan'dan 240 km az araba sürmüştür. Hasan, Ali'nin sürdüğü miktarın 9 katı kadar araba sürmüştür Ali 50 km araba sürmüştür. Buna göre Mert'in sürdüğü miktarı bulunuz.	Ali, Hasan ve Mert birlikte aynı arabayla hafta sonu tatili için gittikleri geziden geri dönmektedirler. Dönüşümlü olarak arabayı kullanarak yolculuğu tamamlamışlardır. Mert, Hasan'dan 240 km az araba sürmüştür. Hasan, Ali'nin sürdüğü miktarın 9 katı kadar araba sürmüştür Ali 80 km araba sürmüştür. Buna göre Mert'in sürdüğü miktarı bulunuz.	6	6	6	6
M11	drive	2	6	Problem 2: Ali, Hasan ve Mert birlikte aynı arabayla hafta sonu tatili için gittikleri geziden geri dönmektedirler. Dönüşümlü olarak arabayı kullanarak yolculuğu tamamlamışlardır. Mert, Hasan'dan 20 km az araba, Hasan, Ali'nin sürdüğü miktarın 1 katı kadar sürmüştür, Ali 80km araba sürmüştür. Buna göre hepsinin toplam araba sürdüğü miktarı bulunuz	Ali, Hasan ve Mert birlikte aynı arabayla hafta sonu tatili için gittikleri geziden geri dönmektedirler. Dönüşümlü olarak arabayı kullanarak yolculuğu tamamlamışlardır. Mert, Hasan'dan 20 km az araba, Hasan, Ali'nin sürdüğü miktarın 9 katı kadar sürmüştür, Ali 80 km araba sürmüştür. Buna göre hepsinin toplam araba sürdüğü miktarı bulunuz	6	6	6	6
M11	drive	3	6	Problem 3: Ali, Hasan ve Mert birlikte aynı arabayla hafta sonu tatili için gittikleri geziden geri dönmektedirler Dönüşümlü olarak arabayı kullanarak yolculuğu tamamlamışlardır, Mert, Hasandan 240 km 12 araba sürmüştür Hasan, Ali'nin sürdüğü miktarın katı kadar araba sürmüştür Ali 80 km araba sürmüştür Buna göre Hasan'ın sürdüğü araba miktarını bulunuz	Ali, Hasan ve Mert birlikte aynı arabayla hafta sonu tatili için gittikleri geziden geri dönmektedirler Dönüşümlü olarak arabayı kullanarak yolculuğu tamamlamışlardır, Mert, Hasandan 240 km az araba sürmüştür Hasan, Ali'nin sürdüğü miktarın 9 katı kadar araba sürmüştür Ali 80 km araba sürmüştür Buna göre Hasan'ın sürdüğü araba miktarını bulunuz	5	5	6	6
M11	cake	1	6	Problem 1:Bir kek 8 eşit parçaya ayrılmıştır, Elif kekin 1/8 ini, Mert 3/8 ini ve Kübra ise 2/8 ini yemiştir. Elif ve Kübra'nın yediği toplam kek miktarını yüzde ile gösteriniz.	Bir kek 8 eşit parçaya ayrılmıştır, Elif kekin 4/8'ini, Mert 2/8'ini ve Kübra ise 2/8'ini yemiştir. Elif ve Kübranın yediği toplam kek miktarını yüzde ile gösteriniz.	6	6	6	6
M11	cake	2	6	Problem 2: Bir kek 8 eşit parçaya ayrılmıştır, Elif kekin 1/8 ini Mert 3/8 ini ve Kübra ise 2/8 ini yemiştir buna göre Elif'in yediği kek miktarının Mert'in yediği kek miktarından ne kadar fazla olduğunu bulunuz	Bir kek 8 eşit parçaya ayrılmıştır, Elif kekin 4/8'ini Mert 2/8'ini ve Kübra ise 2/8'ini yemiştir buna göre Elif'in yediği kek miktarının Mert'in yediği kek miktarından ne kadar fazla olduğunu bulunuz	4	4	6	6
M11	cake	3	6	Problem 3: Bir kek 8 eşit parçaya ayrılmıştır. Elif kekin 1/8 ini, Mert 3/8 ini ve Kübra ise 2/8 ini yemiştir. Buna göre hepsinin yediği toplam kek miktarının Elif'in yediği kek miktarından ne kadar fazla olduğunu kesir ile gösterin.	Bir kek 8 eşit parçaya ayrılmıştır. Elif kekin 4/8'ini Mert 2/8'ini ve Kübra ise 2/8'ini yemiştir. Buna göre hepsinin yediği toplan kek miktarının Elif'in yediği kek miktarından ne kadar fazla olduğunu kesir ile gösterin	6	6	6	6
M2	drive	1	6	Hasanın sürdüğü km Kaçtır?	Hasanın sürdüğü km Kaçtır?	6	6	6	6
M2	drive	2	6	Mert, Hasan ve Alinin sürdüğü km sayısı kaçtır.	Mert, Hasan ve Alinin sürdüğü km sayısı kaçtır.	6	6	6	6
M2	drive	3	6	Mert ve Hasanın sürdüğü kon Sayısı kaçtır.	Mert ve Hasanın sürdüğü km Sayısı kaçtır.	6	6	6	6
M2	cake	1	6	Elif, Mert ve Kübranın yedikleri toplam kek sayısı kaçtır?	Elif, Mert ve Kübra'nın yedikleri toplam kek sayısı kaçtır?	6	6	6	6
M2	cake	2	6	Kübra ve Elif toplam kek sayısı kaçtır.	Kübra ve Elif toplam kek sayısı kaçtır.	6	6	6	6
M2	cake	3	6	Mert ve Elif yemeseydi kalan kek sayısı kaçtır?	Mert ve Elif yemeseydi kalan kek sayısı kaçtır?	6	6	6	6
M3	drive	1	6	Mert toplam kaa km araba Sürmüştür?	Mert toplam kaç km araba sürmüştür?	6	6	6	6
M3	drive	2	3	Harsan bu durumda mertten-koalam farb yada ar batmiştir?	Hasan bu durumda mertten kaç km fazla yada az gitmiştir?	3	3	3	3
M3	drive	3	6	Tomlanda herkes kaa lem arcuba Sürmüşfor.	Tomlanda herkes kaç km araba sürmüştür.	6	6	6	6
M3	cake	1	6	Problem 1: Bu arkadaşların hepsi toplam kaç kek dilimi yemiştir?	Problem 1: Bu arkadaşların hepsi toplam kaç kek dilimi yemiştir?	6	6	6	6
M3	cake	2	6	Problem 2: Bu durumda en çok keki kim yemiştir?	Problem 2: Bu durumda en çok keki kim yemiştir?	6	6	6	6
M3	cake	3	6	Problem 3: Mert ve Kübranın toplam dilim sayısı kaçtır?	Problem 3: Mert ve Kübranın toplam dilim sayısı kaçtır?	6	6	6	6
M4	drive	1	6	Bu duruma göre Mert kaç km sürmüştür?	Bu duruma göre Mert kaç km sürmüştür?	6	6	6	6
M4	drive	2	5	Ali'nin diğer birisiyle eşitlenmesi için kaç km sürmelidir?	Ali'nin diğer birisiyle eşitlenmesi için kaç km sürmelidir?	5	5	5	5
M4	drive	3	6	Mert ve Hasan kaç km sürmüştür?	Mert ve Hasan kaç km sürmüştür?	6	6	6	6
M4	cake	1	3	Buna göre bir tane daha kek yapı Livine eşit şekille kele Enşermi? eşit durmu?	Buna göre bir tane daha kek yapılırsa herbirine eşit şekilde kek düşermi? eşit olurmu?	1	1	5	5
M4	cake	2	4	Bu Zuruma göre Mert ve deübra'ya 9 zilim kek verilirse nasıl eşitleriz? (virgül ile yapınız)	Bu duruma göre Mert ve Kübra'ya 9 dilim kek verilirse nasıl eşitleriz? (virgül ile yapınız)	6	6	6	6
M4	cake	3	0			0	0	0	0
M5	drive	1	6	Buna göre Hasan kaç km araba Sürmüştür	Buna göre Hasan kaç km araba Sürmüştür	6	6	6	6
M5	drive	2	6	Buna göre mert kaç km araba sormuştur	Buna göre mert kaç km araba sürmüştür	6	6	6	6
M5	drive	3	6	Buna göre Ali ile Mert'in aralarındakı fark kaçtır	Buna göre Ali ile Mert'in aralarındakı fark kaçtır	6	6	6	6
M5	cake	1	6	Buna göre çocukların yediği kek miktarını yüzde ile gösteriniz	Buna göre çocukların yediği kek miktarını yüzde ile gösteriniz	6	6	6	6
M5	cake	2	6	Buna göre mert ile Elifin yediği toplam kek miktarını bulunuz	Buna göre mert ile Elifin yediği toplam kek miktarını bulunuz	6	6	6	6
M5	cake	3	6	Buna göre Elifin yediği kek miktarı Kübra'nın yediği kek miktarından nekadar fazladır	Buna göre Elifin yediği kek miktarı Kübra'nın yediği kek miktarından nekadar fazladır	6	6	6	6
M6	drive	1	6	Mert kaç km oraba sürmüştür?	Mert kaç km araba sürmüştür?	6	6	6	6
M6	drive	2	6	Mert ve Alinin sürdüğü km ile hasanın sürdüğü km'nin farkı koçtır.?	Mert ve Alinin sürdüğü km ile hasanın sürdüğü km'nin farkı kaçtır?	6	6	6	6
M6	drive	3	4	Mert, Ali ve Hasanın sür düğü km'nin aritmatik ortalaması kaçtır?	Mert, Ali ve Hasanın sürdüğü km'nin aritmatik ortalaması kaçtır?	6	6	6	6
M6	cake	1	6	8 parçaya ayrılan kekin Elif ve Kübra kaçta kaçını yemiştir?	8 parçaya ayrılan kekin Elif ve Kübra kaçta kaçını yemiştir?	6	6	6	6
M6	cake	2	6	Mert kekin 7/8 ini yediyse Elif ve Kübraya kaç Parça kek kalır?	Mert kekin 2/8 ini yediyse Elif ve Kübraya kaç Parça kek kalır?	6	6	6	6
M6	cake	3	2	Elifin ve Kübranın yediği kek sayısı kaçtır?	Elifin ve Kübranın yediği kek sayısı kaçtır?	6	6	6	6
M7	drive	1	6	Buna göre Mert Ali'den kaç katı daba Sürmüştür.	Buna göre Mert Ali'den kaç katı daha Sürmüştür.	6	6	6	6
M7	drive	2	6	Hasan kaç km yol gitmiştir.	Hasan kaç km yol gitmiştir.	6	6	6	6
M7	drive	3	4	Mert, Aliden kaç kim az yol gitmiştir	Mert, Aliden kaç km az yol gitmiştir	4	4	4	4
M7	cake	1	6	3 11 bir tane tam keki eşit porçalara ayırıyorlar. Elif, Mert, ve Kübra kekin 4/8, 2/8 ve yine 2/8 yerler. Buna göre kaç dilim kek kalmıştır.	bir tane tam keki eşit parçalara ayırıyorlar. Elif, Mert, ve Kübra kekin 4/8, 2/8 ve yine 2/8 yerler. Buna göre kaç dilim kek kalmıştır.	6	6	6	6
M7	cake	2	2	8 eşit paraaya bölünen bir tane kek 3 kişiye ayrılıyor. Elif 4/8, Mert 2/8 ve Kübra 2/8 yerler. Buna göre tepside kog dilim kalmıştır.	8 eşit parçaya bölünen bir tane kek 3 kişiye ayrılıyor. Elif 4/8, Mert 2/8 ve Kübra 2/8 yerler. Buna göre tepside kaç dilim kalmıştır.	6	6	6	6
M7	cake	3	0			0	0	0	0
M8	drive	1	6	Mert toplamda kaç km araba sürmüştür	Mert toplamda kaç km araba sürmüştür	6	6	6	6
M8	drive	2	6	Hasan toplamda kaç km araba sürmüştür	Hasan toplamda kaç km araba sürmüştür	6	6	6	6
M8	drive	3	6	Mert Hasan ve Alinin toplam kaç km araba sürmüştür	Mert Hasan ve Alinin toplam kaç km araba sürmüştür	6	6	6	6
M8	cake	1	6	En fazla kek yiyen kişi kimdir	En fazla kek yiyen kişi kimdir	6	6	6	6
M8	cake	2	6	Mert ve Kübra Toplam kaç dilim kek yemiştir	Mert ve Kübra Toplam kaç dilim kek yemiştir	6	6	6	6
M8	cake	3	6	Kübra ve Elif toplam kaç dilim kek yemistir	Kübra ve Elif toplam kaç dilim kek yemistir	6	6	6	6
M9	drive	1	6	Üç arkadaş toplam kaç km araba sürmüştür?	Üç arkadaş toplam kaç km araba sürmüştür?	6	6	6	6
M9	drive	2	6	Hasan kaç km araba sürmüştür?	Hasan kaç km araba sürmüştür?	6	6	6	6
M9	drive	3	6	En fazla kim araba sürmüştür açıklayınız?	En fazla kim araba sürmüştür açıklayınız?	6	6	6	6
M9	cake	1	6	Kübra ile Elifin yediği kekin toplamı kaçtır?	Kübra ile Elifin yediği kekin toplamı kaçtır?	6	6	6	6
M9	cake	2	6	Buna göre üç arkadaşın (Elif, Mert, Kübra) arasından en fazla kim kek yemiştir. açıklayınız?	Buna göre üç arkadaşın (Elif, Mert, Kübra) arasından en fazla kim kek yemiştir. açıklayınız?	6	6	6	6
M9	cake	3	0			0	0	0	0
S1	drive	1	6	Buna göre mert kaç kilometre araba sürmüştür?	Buna göre mert kaç kilometre araba sürmüştür?	6	6	6	6
S1	drive	2	6	Buna göre Ali ile mert kaç kilometre daha araba kullanırsa Hasan'ın sürdüğü araba miktarına eşitlenir?	Buna göre Ali ile mert kaç kilometre daha araba kullanırsa Hasan'ın sürdüğü araba miktarına eşitlenir?	6	6	6	6
S1	drive	3	6	Arabayı en az Ali kullanmışsa arabayı en çok kim kullanmıştır?	Arabayı en az Ali kullanmışsa arabayı en çok kim kullanmıştır?	6	6	6	6
S1	cake	1	6	Buna göre Elif ile Kübra'nın yediği keklerin Mert'e oranı kaçtır?	Buna göre Elif ile Kübra'nın yediği keklerin Mert'e oranı kaçtır?	6	6	6	6
S1	cake	2	6	eğer mert kekin 5/8'ini yeseydi ve kübra hiç yemese idi Elif kekin kaçta kaçını yemiş olurdu	eğer mert kekin 5/8'ini yeseydi ve kübra hiç yemese idi Elif kekin kaçta kaçını yemiş olurdu	4	6	4	6
S1	cake	3	5	eğer kek 10 dilim olsaydı ve kekin 5/10'ni elif yeseydi ve en az kek yiyen kübra olsaydı mert kaçta kaçını yemiş olurdu	eğer kek 10 dilim olsaydı ve kekin 5/10'ni elif yeseydi ve en az kek yiyen kübra olsaydı mert kaçta kaçını yemiş olurdu	5	5	5	5
S10	drive	1	6	Buna göre Hasan'ın yol aldığı km'nin Mert'in yol aldığı km'ye oranı kaçtır?	Buna göre Hasan'ın yol aldığı km'nin Mert'in yol aldığı km'ye oranı kaçtır?	6	6	6	6
S10	drive	2	6	Buna göre Mert'in yol aldığı km'nin Ali'nin yol aldığı km'ye oranı ne kadardır?	Buna göre Mert'in yol aldığı km'nin Ali'nin yol aldığı km'ye oranı ne kadardır?	6	6	6	6
S10	drive	3	6	Buna göre Hasan'ın yol aldığı km'nin Ali'nin yol aldığı km'ye oranı ne kadardır?	Buna göre Hasan'ın yol aldığı km'nin Ali'nin yol aldığı km'ye oranı ne kadardır?	6	6	6	6
S10	cake	1	6	Buna göre Mert'in ve Kübra'nın yediği kekin Elif'in yediği keke oranı kaçtır?	Buna göre Mert'in ve Kübra'nın yediği kekin Elif'in yediği keke oranı kaçtır?	6	6	6	6
S10	cake	2	3	Buna göre kekin 8 dilimi Kübra'nın yediği keke oranı ne kadardır?	Buna göre kekin 8 dilimi Kübra'nın yediği keke oranı ne kadardır?	6	6	6	6
S10	cake	3	6	Buna göre Mert'in yediği kekin Elif'in ve Kübra'nın yediği keke oranı kaçtır?	Buna göre Mert'in yediği kekin Elif'in ve Kübra'nın yediği keke oranı kaçtır?	6	6	6	6
S11	drive	1	6	Buna göre Ali, Hasan ve Mert toplam kaç km sürmüştür?	Buna göre Ali, Hasan ve Mert toplam kaç km sürmüştür?	6	6	6	6
S11	drive	2	6	Buna göre geziden gidip gelmelers kaç km'dır?	Buna göre geziden gidip gelmeleri kaç km'dir?	6	6	6	6
S11	drive	3	3	Bu 3 arkadaşın aralarındaki farkın, birbirine toplam, kaçtır?	Bu 3 arkadaşın aralarındaki farkın, birbirine toplamı kaçtır?	6	4	6	6
S11	cake	1	4	Bu üç arkadaşın kek yedikten sonraki bibları Elif 46, Mert 40 ve Kübra ise 39'dur. Kekin 4/8 2 kilodur. Buna göre kek yemeden önceki bibları kaçtır?	Bu üç arkadaşın kek yedikten sonraki kiloları Elif 46, Mert 40 ve Kübra ise 39'dur. Kekin 1/8'i 2 kilodur. Buna göre kek yemeden önceki kiloları kaçtır?	6	6	6	6
S11	cake	2	3	Buna göre arkadaşlarının keke oranı kaçtır?	Buna göre arkadaşlarının keke oranı kaçtır?	4	4	4	4
S11	cake	3	6	Buna göre kekin 1/8'i 5 cm olduğuna göre kekin 8/8'i kaçtır?	Buna göre kekin 1/8 5 cm olduğuna göre kekin 8/8'i kaçtır?	6	6	6	6
S12	drive	1	6	Buna göre Hasan kaç kilometre araba kullanmıştır?	Buna göre Hasan kaç kilometre araba kullanmıştır?	6	6	6	6
S12	drive	2	6	Buna göre yolun tamamı kaç Metredir?	Buna göre yolun tamamı kaç Metredir?	6	6	6	6
S12	drive	3	6	Ali, Hasan ve Mert kaçar kilometre gitmiştir? Ne bunu küçükten büyüğe doğu sıralayınız	Ali, Hasan ve Mert kaç kilometre gitmiştir? ve bunu küçükten büyüğe doğu sıralayınız.	6	6	6	6
S12	cake	1	4	Buna göre Elif'in yediği ile Mert'in yediğinin toplamları kaçtır? Oranı ile Mert'in oranı kaçtır?	Buna göre Elifin oranı ile Mertin oranı ile toplamları kaçtır?	6	6	6	6
S12	cake	2	6	Elif'in Mert'e oranı kaçtı?	Elif'in Mert'e oranı kaçtır	6	6	6	6
S12	cake	3	6	En fazla yiyen ile en az yiyen kişileri toplayınız.	En fazla yiyen ile en az yiyen kişileri toplayınız.	4	4	4	4
S13	drive	1	4	Önce Ali'nin sürdüğü miktarını dokuzla çarpıpen kaçtır	Önce Ali'nin sürdüğü miktarını dokuzla çarıpın kaçtır	6	6	6	6
S13	drive	2	2	Hasan sürdüğü miktarın 240km netre çıkarıp	Hasan sürdüğü miktarın 240 km metre çıkarıp	2	2	2	2
S13	drive	3	0			0	0	0	0
S13	cake	1	3	8 Parçaya 80 olduna göre Elif kekten kaç dili yemiştir?	8 parçaya 80 olduna göre Elif kekten kaç dili yemiştir?	4	4	4	4
S13	cake	2	6	Mert'in ve Kübra'ın yedi kek sayısını toplayıp sayı kaçıtır?	Mert'in ve Kübra'ın yedi kek sayısını toplayıp sayı kaçıtır?	6	6	6	6
S13	cake	3	6	Mert'in ve Kübra'ın yedi kek sayısını Elif'in yedikek sayısılı çıkarsa kaçollur?	Mert'in ve Kübra'ın yedi kek sayısını Elif'in yedi kek sayısıla çıkarsa kaç ollur?	6	6	6	6
S14	drive	1	6	Buna göre Mert ve Hasanın gittikleri yolun toplamı kaçtır?	Buna göre Mert ve Hasanın gittikleri yolun toplamı kaçtır?	6	6	6	6
S14	drive	2	6	Buna göre 3 ar kaşın gittikleri yolları Büyükten küçüğe doğru sıralayınız.	Buna göre 3 arkaşın gittikleri yolları Büyükten küçüğe doğru sıralayınız.	6	6	6	6
S14	drive	3	6	Buna göre Alinin gittiği toplam yolun Hasanın gittiği toplam yola oranı kaçtır?	Buna göre Alinin gittiği toplam yolun Hasanın gittiği toplam yola oranı kaçtır?	6	6	6	6
S14	cake	1	6	Buna göre kek'den en fazla ve en az giyeni bulunup yazın12.	Buna göre kek'den en fazla ve en az yiyeni bulunup yazınız.	6	6	6	6
S14	cake	2	6	Buna göre elifin toplam yediği kekin kübramın toplam yediği keke oranı loctir?	Buna göre elifin toplam yediği kekin kübranın toplam yediği keke oranı kaçtır?	6	6	6	6
S14	cake	3	3	Buna göre 3 arkadaşın arasında martarmatiksel olarak en az kiloyu alan kişi hangisidir?	Buna göre 3 arkadaşın arasında matamatiksel olarak en az kiloyu alan kişi hangisidir?	3	3	3	3
S2	drive	1	6	Bu probleme göre Mert ve Ali kaç km yol gitmişlerdir?	Bu probleme göre Mert ve ali kaç km yol gitmişlerdir?	6	6	6	6
S2	drive	2	5	Tatilden dönene kadar kaç saatte bir benzin istasyonuna uğramıştır?	tatilden dönene kadar kaç saat'te bir benzin istasyonuna uğramıştır?	1	1	1	1
S2	drive	3	6	Toplamda hepsi kaç km yol gitmiştir?	toplamda hepsi kaç km yol gitmiştir?	6	6	6	6
S2	cake	1	3	Buna göre Elif ile Mert'in yediği kekten Kübra'ya kaç dilim kek kalır?	Buna göre Elif ile Mert'in yediği kekten Kübra'ya kaç dilim kek kalır?	4	4	4	4
S2	cake	2	5	8 parçalı bir keki herkes eşit oranla 'y' yerse geriye kaç dilim kek kalır?	8 parçalı bir keki herkez eşit oranla yerse geriye kaç dilim kek kalır?	5	5	5	5
S2	cake	3	6	Bunun sonunda Mert'in annesine kaç dilim kek kalır?	Bunun sonunda Mert'in annesine kaç dilim kek kalır?	6	6	6	6
S3	drive	1	6	Hasan Mert Ali toplam kac-cond Sirmiş türler	Hasan Mert Ali toplam kaç cm sürmüştürler	6	6	6	6
S3	drive	2	6	Mert Hasan re Ali yanlarına bir Arleca daş aldılar ve o arkadaş 70000cm sürdüyse toplam kaç km sürdüler	Mert Hasan ve Ali yanlarına bir Arkadaş aldılar ve o arkadaş 70000cm sürdüyse toplam kaç km sürdüler	6	6	6	6
S3	drive	3	6	10 km 18'dk giderlerse toplom yolculuk kaç dk sürmütür	10 km 8'dk giderlerse toplam yolculuk kaç dk sürmütür	6	6	6	6
S3	cake	1	6	8 parça 88 olduğuna göre Elifin merte oranı kaçtır	8 parça 88 olduğuna göre Elifin merte oranı kaçtır	6	6	6	6
S3	cake	2	6	8 parça 160 olduğuna göre mertin yediği keke kübraya oranı kaçtır	8 parça 160 olduğuna göre mertin yediği keke kübraya oranı kaçtır	6	6	6	6
S3	cake	3	4	2/8 . 4/8 . 2/8 bunların çarpımını sayı doğrusunda gösteriniz	2/8.4/8.2/8 bunların çarpımını sayı doğrusunda gösteriniz	4	4	4	4
S4	drive	1	6	Problem 1: Buna göre bu üç arkadaşın toplam sürdüğü km kaçtir.	Buna göre bu üç arkadaşın toplam sürdüğü km kaçtır.	6	6	6	6
S4	drive	2	6	Problem 2: Buna göre bu arkadaşlar arasında en fazla ara ba süren kimdir.	Buna göre bu arkadaşlar arasında en fazla araba süren kimdir.	6	6	6	6
S4	drive	3	6	Problem 3: Buna göre bu üç arkadaşlar arasında ez a2 araba soren kimdir.	Buna göre bu üç arkadaşlar arasında ez az araba süren kimdir.	6	6	6	6
S4	cake	1	6	Bu of arkadaş arasında en çok kek yiyen kim-dir.	Bu üç arkadaş arasında en çok kek yiyen kimdir.	6	6	6	6
S4	cake	2	6	Buna göre bu arkadaşlar arasında en 02 kek yiyen kimdir.	Buna göre bu arkadaşlar arasında en az kek yiyen kimdir.	6	6	6	6
S4	cake	3	6	Buna göre mert ile kübranın yediklerinin topla mi kaştır.	Buna göre mert ile kübranın yediklerinin toplamı kaçtır.	6	6	6	6
S5	drive	1	6	Problem 1: Buna göre Ali ile Mert'in sürdüğü miktarın toplanı ile Hasanın sürdüğü miktardan çıkartınca kalın sonuç Kaçtır?	Buna göre Ali ile Mert'in sürdüğü miktarın toplamı ile Hasanın sürdüğü miktardan çıkartınca kalan sonuç kaçtır?	6	6	6	6
S5	drive	2	4	Problem 2: Buna göre Hasan'ın sürdüğü miktardan Ali hin sürdüğü miktarı çıkartınca çıkan sonuç ile Mert'in sürdüğü miktarı ile toplayınca çıkan sonuç kaatır?	Buna göre Hasan'ın sürdüğü miktardan Ali'nin sürdüğü miktarı çıkartınca çıkan sonuç ile Mert'in sürdüğü miktarı ile toplayınca çıkan sonuç kaçtır?	6	6	6	6
S5	drive	3	6	Problem 3: Buna göre, áralarından en fazla süreni ile en'az büren în toplamı kaçtır?	Buna göre, aralarından en fazla süreni ile en az sürenin toplamı kaçtır?	6	6	6	6
S5	cake	1	6	Buna göre elif ve Kübranın yediği kekin toplamının Mert in yediği keke oranı kaçtır?	Buna göre elif ve Kübranın yediği kekin toplamının Mert'in yediği keke oranı kaçtır?	6	6	6	6
S5	cake	2	4	Buna göre flifin yediği kek ile Mert'in yediği kekin bölümünün sonucu kübrahın yediği kek'ten kaç fazladın?	Buna göre Elifin yediği kek ile Mert'in yediği kekin bölümünün sonucu kübra'nın yediği kek'ten kaç fazladır?	4	6	4	4
S5	cake	3	4	Ancak Elif, kübraya kendi kekinden 2 dilim in kek vermiştir. Buna göre elifin kalan keklerinden, mertin kek- lerinin çarpımı kaçtır?	Ancak Elif, kübraya kendi kekinden 2 dilim kek vermiştir. Buna göre elifin kalan keklerinden, mertin keklerinin çarpımı kaçtır?	4	4	4	4
S6	drive	1	6	Buna göre Mert kaç km araba sürmüştür?	Buna göre Mert kaç km araba sürmüştür?	6	6	6	6
S6	drive	2	2	Buna göre Mert kaç m araba sürmüştür?	Buna göre Mert kaç m araba sürmüştür?	6	6	6	6
S6	drive	3	6	Buna göre bu üçü ne kadar araba sürmüştür?	Buna göre bu üçü ne kadar araba sürmüştür?	6	6	6	6
S6	cake	1	6	Buna göre Elif'in yediği kekin, Mert'in yediği keke oranını bulunuz.	Buna göre Elif'in yediği kekin, Mert'in yediği keke oranını bulunuz.	6	6	6	6
S6	cake	2	6	Buna göre Mert'in yediği kekin, Kübra'nın yediği keke oranını bulunuz.	Buna göre Mert'in yediği kekin, Kübra'nın yediği keke oranını bulunuz.	6	6	6	6
S6	cake	3	4	Buna göre Kübra'nın yediği kekin, Elif'in yediği keke oranının Mert'in yediği keke oranı kaçtır?	Buna göre Kübra'nın yediği kekin, Elif'in yediği keke oranının Mert'in yediği keke oranın kaçtır?	6	6	6	6
S7	drive	1	6	Buna göre Mert kaç km araba sürmüştür?	Buna göre Mert kaç km araba sürmüştür?	6	6	6	6
S7	drive	2	6	Buna göre Mert Ali'den kaç km daha fazla sürmüştür?	Buna göre Mert Ali'den kaç km daha fazla sürmüştür?	6	6	6	6
S7	drive	3	6	Buna göre Mert ile Hasan toplam kaç km araba sürmüşlerdir?	Buna göre Mert ile Hasan toplam kaç km araba sürmüşlerdir?	6	6	6	6
S7	cake	1	6	Buna gör Elif ile Mertin Medikleri parçaların toplamı Kübramın yediği parçaya oram kaçtıl?	Buna gör Elif ile Mert'in yedikleri parçaların toplamı Kübranın yediği parçaya oranı kaçtır?	6	6	6	6
S7	cake	2	6	Buna göre Elif Kübradan kaç parça fazla yemiştir?	Buna göre Elif Kübra'dan kaç parça fazla yemiştir?	6	6	6	6
S7	cake	3	6	Buna göre Mertile Kübra in yedikleri parçalanm toplamı kaçtır?	Buna göre Mert ile Kübra'nın yedikleri parçaların toplamı kaçtır?	6	6	6	6
S8	drive	1	6	Mert kaç km vaba sürmüştür?	Mert kaç km araba sürmüştür?	6	6	6	6
S8	drive	2	3	Mert'le Hasanın arasındaki ki farkı kaçtır?	Mert'le Hasanın arasındaki km farkı kaçtır?	3	3	3	3
S8	drive	3	6	Buckadaslar toplam kaç km yol gitmişt	Bu arkadaslar toplam kaç km yol gitmiştir?	6	6	6	6
S8	cake	1	4	Problem 1: Mert'in yediği kekin 5 kat fazlası nedir?	Problem 1: Mert'in yediği kekin 5 kat fazlası nedir?	4	6	4	6
S8	cake	2	6	Problem 2: Buna göre kekten kim daha fazla yemiştir?	Problem 2: Buna göre kekten kim daha fazla yemiştir?	6	6	6	6
S8	cake	3	6	Problem 3: Kübra ketten nekadar yerse kekin yarısını yemişdu?	Kübra kekten ne kadar yerse kekin yarısını yemiş olur?	6	6	6	6
S9	drive	1	6	Duna göre Hwan kat in ambe sürtüjtir?	Buna göre Hasan kaç km araba sürmüştir?	6	6	6	6
S9	drive	2	6	Buna göre, Mera Kaş bre ariba sürmüştür?	Buna göre, Mert Kaç km araba sürmüştür?	6	6	6	6
S9	drive	3	6	Buna göre Martini sür die kw, Jopisi ile Hesinin sürdüğu kan Sayısının arysinthel Fark nilir?	Buna göre Mertin sürdüğü km sayısı ile Hasan'ın sürdüğu km sayısının arasındaki fark nedir?	4	4	3	3
S9	cake	1	6	Buna göre kek de geriye kalan parça sayısı kaçtır?	Buna göre kekde geriye kalan parça sayısı kaçtır?	6	6	6	6
S9	cake	2	6	Buna göre pasta'yı en çok kim yemiştir?	Buna göre pastayı en çok kim yemiştir?	6	6	6	6
S9	cake	3	6	Buna göre pasta'yı en az kim yemiştir?	Buna göre pastayı en az kim yemiştir?	6	6	6	6
T1	drive	1	6	Hasan kaç km araba sürmüştür?	Hasan kaç km araba sürmüştür?	6	6	6	6
T1	drive	2	6	Mert kaç km araba sürmüştür?	Mert kaç km araba sürmüştür?	6	6	6	6
T1	drive	3	4	Mert. Hasan ve Alinin sürdoğu kilometra miktarının ortalarasını bulunuz.	Mert, Hasan ve Ali'nin sürdüğü kilometre miktarının ortalamasını bulunuz.	6	6	6	6
T1	cake	1	6	Eğer bu kek 10 eşit Parçaya ayrılsaydı, Elif kekin (Ondalık gösterimle) ne kadar yediğini bulunuz.	Eğer bu kek 10 eşit parçaya ayrılsaydı, Elif kekin (ondalık gösterimle) ne kadar yediğini bulunuz.	6	6	6	6
T1	cake	2	6	Elif ve Mert'in yediği kek miktarının farkını bulunuz.	Elif ve Mert'in yediği kek miktarının farkını bulunuz.	6	6	6	6
T1	cake	3	6	Kübra ile Elifin yediği kek miktarının toplamı kaçtır?	Kübra ile Elifin yediği kek miktarının toplamı kaçtır?	6	6	6	6
T10	drive	1	6	Önce Mert, Hasan'nın arabayı ne kadar sürdüğünü bulunuz.	Önce Mert, Hasan'nın arabayı ne kadar sürdüğünü bulunuz.	6	6	6	6
T10	drive	2	1	Bulduğunuan sonve Ikişi sayısıyla çarpınız.	Bulduğunuz sonuc kişi sayısıyla çarpınız.	1	1	1	2
T10	drive	3	4	Eğer bir kişite 50 km gitsaydi sonuç kaly olurdu?	Eğer bir kişide 50 km gitseydi sonuç kaç olurdu?	3	1	5	5
T10	cake	1	1	Çıkan sonucu tepe değer haline getiriniz.	Çıkan sonucu tepe değer haline getiriniz.	1	1	1	1
T10	cake	2	1	Tepe değeri en yakın olan sayıya yuvarlayınız.	Tepe değeri en yakın olan sayıya yuvarlayınız.	1	1	1	1
T10	cake	3	1	Yuvarladığınız sayıya ondalık gösterim ile gösteriniz.	Yuvarladığınız sayıya ondalık gösterim ile gösteriniz.	1	1	1	1
T11	drive	1	3	Hasan, Ali'nin kaa Miletarı kadar araba sürmüştüün?	Hasan, Ali'nin kaç miktarı kadar araba sürmüştür?	3	3	3	3
T11	drive	2	3	Mert, Hasan'dan kaç km az araba sürmüştür?	Mert, Hasan'dan kaç km az araba sürmüştür?	3	3	3	3
T11	drive	3	3	Ali 100 km araba Mi sürmüştür. Doğru Mu Yanlış mı?	Ali 100 km araba mı sürmüştür. Doğru Mu Yanlış mı?	3	3	3	3
T11	cake	1	6	Buna göre toplam kaç parça gemişlerdir?	Buna göre toplam kaç parça yemişlerdir?	6	6	6	6
T11	cake	2	3	Yedilelers kekin fiyatı 15 TL toplamı ne kadar ödemişlerdir?	Yedikleleri kekin fiyatı 15 TL toplamı ne kadar ödemişlerdir?	6	6	3	6
T11	cake	3	5	5 kişi daha bolsaydı kek kaç eş parçaya ayrılırdı?	5 kişi daha olsaydı kek kaç eş parçaya ayrılırdı?	5	5	5	5
T12	drive	1	5	1 kisinin sürdüğü toplam km kaçtır	1 kisinin sürdüğü toplam km kaçtır	5	5	5	5
T12	drive	2	3	Ali neden hasandan 92 sürmüştür	Ali neden hasandan az sürmüştür	3	3	3	3
T12	drive	3	4	Hasan 240km sürdüyse araba ne kadar mazot yakmıştır	Hasan 240 km sürdüyse araba ne kadar mazot yakmıştır	5	1	5	5
T12	cake	1	6	Elifin yediği kek sayısı ve kübranın yediği kek sayısı toplamı kaçtır?	Elifin yediği kek sayısı ve kübranın yediği kek sayısı toplamı kaçtır?	6	6	6	6
T12	cake	2	6	Mert elif ve kübra kadar yiyebilmişmidir	Mert elif ve kübra kadar yiyebilmişmidir	6	6	6	6
T12	cake	3	6	Hepsinin yediği toplam miktar kaçtır	Hepsinin yediği toplam miktar kaçtır	6	6	6	6
T13	drive	1	6	buna göre Mert, Hasan ve Ali kaç km sürmüşlerdill	buna göre Mert, Hasan ve Ali kaç km sürmüşlerdir?	6	6	6	6
T13	drive	2	6	buna göre Mert Hasan ve ali kaç km sürdüklerini küçükten büyüğe Sıralayın	buna göre Mert Hasan ve ali kaç km sürdüklerini küçükten büyüğe sıralayın	6	6	6	6
T13	drive	3	6	buna göre en fazla um bi kim sürcek?	buna göre en fazla km'yi kim sürcek?	6	6	6	6
T13	cake	1	6	Bir kek 8 esit Parçaga asrılmıştır Elif bekin 4/8 ini Mert 2/8 ini ve kõbra ise 2/8 ini yemiştir. Buna göre büsükten küçüğe Sıralasın?	Bir kek 8 esit parçaya ayrılmıştır Elif kekin 4/8'ini Mert 2/8'ini ve kübra ise 2/8'ini yemiştir. Buna göre büyükten küçüğe sıralayın?	6	6	6	6
T13	cake	2	6	Bir kek 8 eşit paraasa ayrılmıştır Elif kekin 4/8 ini Mert 2/8 ini ve kõbra ise 2/8 ini yemiştir buna göre Elif diğerlerinden ne kadar fazla yemiştir?	Bir kek 8 eşit parçaya ayrılmıştır Elif kekin 4/8'ini Mert 2/8'ini ve kübra ise 2/8'ini yemiştir buna göre Elif diğerlerinden ne kadar fazla yemiştir?	6	6	6	6
T13	cake	3	5	Bir kek 8 eşit parçasa ayrılmıştık Elif kickin 4/8 ini Mert 2/8 ini ve kübra ise 2/8 ini bemiştir buna göre Bir kişi daha gelsesdi herkes me kader Pas berdi?	Bir kek 8 eşit parçaya ayrılmıştır. Elif kekin 4/8'ini Mert 2/8' ini ve kübra ise 2/8'ini bemiştir buna göre Bir kişi daha gelseydi herkes ne kadar parça yerdi?	4	4	5	5
T14	drive	1	6	Yukarıdaki verilen bölümde Mert Hasan'dan 240 km az sürmüştür. Hasan da Ali'nin sürdüğü miktarın 9 katı kadar araba sürmüştür. Ali 80 km sürmüştür. Buna göre toplamda kaç km sürmüşlerdir?	Yukarıdaki verilen bölümde Mert Hasan'dan 240 km az sürmüştür. Hasan da Ali'nin sürdüğü miktarın 9 katı kadar araba sürmüştür. Ali 80 km sürmüştür. Buna göre toplamda kaç km sürmüşlerdir?	6	6	6	6
T14	drive	2	6	Hasan Ali'nin 9 katı kadar sürmüştür. Buna göre Hasan kaç km sürmüştür?	Hasan Ali'nin 9 katı kadar sürmüştür. Buna göre Hasan kaç km sürmüştür?	6	6	6	6
T14	drive	3	5	Hasan, Ali ve Mert'in toplamda sürdüğü km kaç gün sürmüştür?	Hasan, Ali ve Mert'in toplamda sürdüğü km kaç gün sürmüştür?	5	5	5	5
T14	cake	1	1	Bir meyve suyunu Elif'e, Mert'e ve Kübra'ya nasıl eşit eşit dağıtırız?	Bir meyve suyunu Elif'e, Mert'e ve Kübra'ya nasıl eşit eşit dağıtılır?	1	1	1	1
T14	cake	2	3	Elif, Mert ve Kübra, eşit eşit dağıtmaları faydalı olmuş mudur?	Elif, Mert ve Kübra, eşit eşit dağıtmaları faydalı olmuş mudur?	3	3	3	3
T14	cake	3	3	Onlar eşit dağıtmışlar mıdır fikirlerinizi yeriniz.	Onlar eşit dağıtmışlar mıdır fikirlerinizi yazınız.	6	3	6	3
T15	drive	1	6	Ali, Hasan ve Mert toplam kaç metre araba sürmüştür?	Ali, Hasan ve Mert toplam kaç metre araba sürmüştür?	6	6	6	6
T15	drive	2	6	Yukarıdaki bilgiye göre Ali ve Hasan'ın sürdüğü toplam km nedir?	Yukarıdaki bilgiye göre Ali ve Hasan'ın sürdüğü toplam km nedir?	6	6	6	6
T15	drive	3	6	Dönüşün - gidiş ve geliş kilometreleri kaçtır?	Üçünün gidiş ve geliş kilometreleri kaçtır?	5	5	6	6
T15	cake	1	6	Bir kek 8 esit parçaya ayrılmıştır. Elif kekin 2/8 ini, Mert 2/8 ini ve Kübra ise 2/8 ini yemiştir. Buna gore Kobra ve Mert'in yediği toplam pasta miktarı kimin yediği pasta miktarına eşittir?	Bir kek 8 esit parçaya ayrılmıştır. Elif kekin 4/8 ini, Mert 2/8 ini ve Kübra ise 2/8 ini yemiştir. Buna gore Kübra ve Mert'in yediği toplam pasta miktarı kimin yediği pasta miktarına eşittir?	4	4	6	6
T15	cake	2	1	Yukarıdaki bilgiye göre yenilen pastaların modellemesini yapınr.	Yukarıdaki bilgiye göre yenilen pastaların modellemesini yapınız.	6	3	6	3
T15	cake	3	6	Kela sadece Kobra yeseydi pastanın kaçta kaçı kalırdı?	Keki sadece Kübra yeseydi pastanın kaçta kaçı kalırdı?	6	6	6	6
T16	drive	1	6	Mert, Hasan'dan 240 km az araba sürdüğü ve Ali'nin sürdüğü miktarın 9 katı kadar araba sürmüştür. Ali ise 80 km araba sürmüştür. Buna göre Mert kaç km araba sürmüştür?	Mert, Hasan'dan 240 km az araba sürdüğü ve Ali'nin sürdüğü miktarın 9 katı kadar araba sürmüştür. Ali ise 80 km araba sürmüştür. Buna göre Mert kaç km araba sürmüştür?	6	6	6	6
T16	drive	2	6	Mert, Hasan'dan 240 km az araba sürdüğü ve Ali'nin sürdüğü miktarın 9 katı kadar araba sürmüştür. Ali ise 80 km araba sürmüştür. Buna göre Hasan kaç km araba sürmüştür?	Mert, Hasan'dan 240 km az araba sürdüğü ve Ali'nin sürdüğü miktarın 9 katı kadar araba sürmüştür. Ali ise 80 km araba sürmüştür. Buna göre Hasan kaç km araba sürmüştür?	6	6	6	6
T16	drive	3	6	Buna göre toplam gidiş ve geliş kaç km olur?	Buna göre toplam gidiş ve geliş kaç km olur?	6	6	6	6
T16	cake	1	4	Eger 3 orkadaşın yanında bir kişi daha olsaydı her- kese kişi başı ne kodor dilim yenmelidir?	Eger 3 arkadaşın yanında bir kişi daha olsaydı herkese kişi başı ne kadar dilim yenmelidir?	5	5	6	5
T16	cake	2	4	Bir ket 8 esit porçaya ayrılmıştın Elif ketinfini, Mert int ve Kobro ise ini yemistin. Eger herkes 4 dilim yiyecek olsa kaç es porçaya ayrılırdı?	Bir kek 8 esit parçaya ayrılmıştır. Elif kekin 4/8'ini, Mert 2/8'in ve Kübra ise 2/8'ini yemistir. Eğer herkes 4 dilim yiyecek olsa kaç es parçaya ayrılırdı?	6	6	6	6
T16	cake	3	1	Elif'in modelini gösterecek dsok nosil model üzerinde gösteririz?	Elif'in modelini gösterecek olsak nasıl model üzerinde gösteririz?	6	6	6	6
T17	drive	1	2	ikisini toplatım 24° 329 +8° 320 329	ikisini toplarım	1	1	2	2
T17	drive	2	2	Bence MertinveHasanın arabasına biasin Ali	Bence Mertin ve Hasanın arabasına binsin Ali.	1	1	1	1
T17	drive	3	2	tatile berader giderler soluta çözülür.	tatile berader giderler soruda çözülür.	1	1	1	1
T17	cake	1	2	Ben olsam kekig yaparım. Ben bir kaç kişi daho, eklemek istiyorum	Ben olsam keki 9 yaparım Ben bir kaç kişi daha eklemek istiyorum	1	1	2	2
T17	cake	2	2	Kerim 1/8, Efe 5/8, Umut 6/8, Rusya 7/8, Nil 2/8	Kerim 1/8, Efe 5/8, Umut 6/8, Rüya 7/8, Nil 9/8	2	2	2	2
T17	cake	3	2	ve Bana kalıyor Beren 3/8 olabilir.	ve Bana kalıyor Beren 3/8 olabilir.	2	2	2	2
T18	drive	1	2	Hasan neben 240 km sürm	Hasan neden 240 km sürm	2	2	3	3
T18	drive	2	6	ali ve havanın toplam kaç le m sürmüştür	ali ve hasanın toplam kaç km sürmüştür	6	6	6	6
T18	drive	3	3	Hosan neden martin I katralaka Sürmüştür	Hasan neden mertin 9 katı araba sürmüştür	3	3	3	3
T18	cake	1	3	Buna göre kekin büyük buzun nos. ldır	Buna göre kekin büyüklüğü nasıldır	1	3	1	3
T18	cake	2	6	Elif buna göre los tane bod yemiştir	Elif buna göre kaç tane kek yemiştir	2	2	3	6
T18	cake	3	6	her biline bukadar Falan kele düs mistンン bu lekin toplam, nedir	her birine bu kadar Falan kek düşmüştür bu kekin toplamı nedir	3	4	6	5
T19	drive	1	6	Mert kaa km araba sürmüştür?	Mert kaç km araba sürmüştür?	6	6	6	6
T19	drive	2	6	Hasan kaa km araba sürmüştür?	Hasan kaç km araba sürmüştür?	6	6	6	6
T19	drive	3	6	Ali, Hasan ve Mert birlikte kaca lem araba sürmüştür?	Ali, Hasan ve Mert birlikte kaç km araba sürmüştür?	6	6	6	6
T19	cake	1	4	8 eşit porçaqla Elif in kekin 4/8'ini çarpın.	8 eşit parçayla Elif in kekin 4/8'ini çarpın.	4	4	4	4
T19	cake	2	3	Mert 8 eşit parçada kaçta kaçını yemiştir.	Mert 8 eşit parçada kaçta kaçını yemiştir.	3	3	3	3
T19	cake	3	3	Kobra, Mert ve Elif'in yedikleri keki kaa dilime nasıl kesmişlerdit?	Kübra, Mert ve Elif'in yedikleri keki kaç dilime nasıl kesmişlerdir?	3	3	3	3
T2	drive	1	1	Problem 1: Mehmet bey kendine bir araba almıştır arabanın fiya bi 2050 dir mehmet bey arabaya 2090 fele vermiştir memet baje nekadar Para kalmıştır	Mehmet bey kendine bir araba almıştır arabanın fiya bi 2050'dir mehmet bey arabaya 2090 tele vermiştir memet beye nekadar Para kalmıştır	1	1	1	1
T2	drive	2	1	Problem 2: Zeynel Kirtasiyeder bir kalen bir silgs birde Defter almıştır toplam 48 TL Tutmuştur kalem, Silgi, Defter nekadardır?	Zeynep kırtasiyeden bir kalem bir silgi bir de Defter almıştır toplam 48 TL Tutmuştur kalem, Silgi, Defter nekadardır?	1	1	1	1
T2	drive	3	1	Problem 3: Ali bey manavaden Korfuz, elma, kivi, kiraz almıştır kirazların toplam fiyatı GOTLdir helsinin fiyatı ne kadardır?	Ali bey manavdan karpuz, elma, kivi, kiraz almıştır kirazların toplam fiyatı 40 TLdir hepsinin fiyatı ne kadardır?	1	1	1	1
T2	cake	1	3	Problem 1: Bir Dikdörtgen Pasta 13 eşit Parçaya bölünmüştür. Ayşe 9/13'ünü yemiştir, Zeynep 1/13'ünü yemiştir. Simay ise 4/13'ünü yemiştir. Tüm yenilen Pasta dilimlerinin toplamı kaçtır? Cevap:	Bir Dikdörtgen Pasta 13 eşit Parçaya bölünmüştür. Ayşe 2/13'nü yemiştir, Zeynep 4/13 yemiştir. Almina 4/13 yemiş geri kalanını Simay yemiştir. Tüm yenilen Pasta dilimlerinin toplamı kaçtır?	4	4	6	6
T2	cake	2	1	Problem 2: Bir mağazada iki tane indirimde olan tişört ve elbise vardır. Normalde iki tişörtte de %50 indirim vardır. Elbisede de %50 indirim vardır. Buna göre Simay indirimdeki elbise ve tişörtleri alırsa kaç lira öder? Cevap:	Bir mağazada iki tane indirimde olan tişört ve elbise vardır. Normalde iki tişörtte de %50 indirim vardır. elbisedede %50 indirim vardır. buna göre Simay indirimdeki elbise ve tişörtleri alırsa kaç lira öder?	1	1	1	1
T2	cake	3	1	Problem 3: Ayşe hanım markete girdiğinde 20 tane makarna görmüştür. Makarnaların 1/20 sini almıştır. Geriye kalan makarnaların 1/20 sini almıştır ve Ayşe hanımın aldığı makarnaların toplamı kaçtır?	Ayşe hanım markete girdiğinde 20 tane makarna görmüştür. Makarnaların 10/20 sini almıştır geriye kalan makarnaların ve Ayşe hanımın aldığı makarnaların x'pımı kaçtır	2	1	4	4
T20	drive	1	6	If asuin okca Km ala Ba Sürmü	Hasan ka km araBa sürmüştür	6	6	6	6
T20	drive	2	6	hahan Alini kaçta kal kapal ata ba saramus tür	hasan Alini kaçta kaçı kadar araba sürmuştür	3	3	6	3
T20	drive	3	6	mert kak km SÜI Müştür	mert kaç km sürmüştür	6	6	6	6
T20	cake	1	6	Elif kaç adet dilim yemiştir?	Elif kaç adet parça yemiştir	6	6	6	6
T20	cake	2	6	kek 18 parçaya bölünseydi kaç kalanı olurdu?	kek 18 parçaya bölünseydi kaç kaç Bölünürdü	5	5	5	6
T20	cake	3	6	kek 16 parça olsaydı Elif ne kadar yerdi?	kek 16 parça olsaydı Elif ne kadar yerdi	6	6	6	6
T21	drive	1	6	Mert kok kam araba sormistir.	Mert kaç km araba sürmüştür.	6	6	6	6
T21	drive	2	5	Aasen Aliden 10 bat fazla sorseti Ali kah kan araba siberdi.	Hasan Aliden 10 kat fazla sürseydi Ali kaç km araba sürerdi.	3	3	3	3
T21	drive	3	6	Hasan, Mert ve Ali kaçar km araba sürmüştür,	Hasan, Mert ve Ali kaç km araba sürmüştür.	6	6	6	6
T21	cake	1	6	Problem 1: bir kek 8 eşit parçaya ayrılmıştır. Elif kekin 4/8'ini, Mert 2/8'ini ve Kübra ise 2/8'ini yemiştir. Buna göre Elif pastanın yüzde kaçını yemiştir.	Bir kek 8 eşit parçaya ayrılmıştır. Elif kekin 4/8'ini, Mert 2/8'ini ve Kübra ise 2/8'ini yemiştir. Buna göre Elif pastanın yüzde kaçını yemiştir.	6	6	6	6
T21	cake	2	6	Problem 2: Elif ve Kübra kekin yizde kalını yemiştir,	Elif ve Kübra kekin yüzde kaçını yemiştir.	6	6	6	6
T21	cake	3	6	Problem 3: Kobra ve mert kerim yozde ledeni Lepistil	Kübra ve mert kekin yüzde kaçını yemiştir	1	2	6	6
T22	drive	1	6	Ali ve Hasanın Km lerinin Toplamı?	Ali ve Hasanın Km'lerinin Toplamı?	6	6	6	6
T22	drive	2	6	En fazla Kim Araba Sürmüştür?	En fazla Kim Araba Sürmüştür?	6	6	6	6
T22	drive	3	6	Ali ve Merzin Km'lerinin Toplamı?	Ali ve Mertin Km'lerinin Toplamı?	6	6	6	6
T22	cake	1	6	Elifin yediği kek ve Mert'in yediği keklerin toplamı?	Elifin yediği kek ve Mertin yediği keklerin Toplamı?	6	6	6	6
T22	cake	2	6	En çok kek kim yemiştir?	En çok kek kim yemiştir?	6	6	6	6
T22	cake	3	6	En az kek kim yemiştir?	En az kek kim yemiştir?	6	6	6	6
T23	drive	1	6	Hasan kaç km araba sürmüştür?	Hasan kaç km araba sürmüştür?	6	6	6	6
T23	drive	2	6	Mert kaç km araba sürmüştür?	Mert kaç km araba sürmüştür?	6	6	6	6
T23	drive	3	6	Hasan 710 km araba sürmüştür? Doğru/Yanlış	Hasan 710 km araba sürmüştür? Doğru/Yanlış	6	6	6	6
T23	cake	1	4	Elif, Mert ve Kübra'nın aritmetik ortalamasını bulunuz?	Elif, Mert ve Kübra'nın aritmetik ortalamasını bulunuz?	4	4	4	4
T23	cake	2	6	Kekte kaç tane parça kalmıştır?	Kekte kaç tane parça kalmıştır?	6	6	6	6
T23	cake	3	6	Kekten Sadece Mert 2/8 yeseydi kekte kaç parça kalmış olurdu?	Kekten Sadece Mert 2/8 yeseydi kekte kaç parça kalmış olurdu?	6	6	6	6
T24	drive	1	6	Hasan kaç km sürmüştü?	Hasan kaç km sürmüştür?	6	6	6	6
T24	drive	2	6	En az araba süren kimdi?	En az araba süren kimdir?	6	6	6	6
T24	drive	3	6	En fazla araba süren kimdi?	En fazla araba süren kimdir	6	6	6	6
T24	cake	1	6	Elif kekin kaç parçasını yemiştir	Elif kekin kaç parçasını yemiştir	6	6	6	6
T24	cake	2	3	Kimler eşit yemiştir	Kimler eşit yemiştir	3	3	3	3
T24	cake	3	3	Kim yarısını yemiştir	Kim yarısını yemiştir	6	6	6	6
T25	drive	1	6	Buna göre kim en çok sürdü	Buna göre kim en çok sürdü	6	6	6	6
T25	drive	2	6	Buna göre kim az sürdü	Buna göre kim az sürdü	6	6	6	6
T25	drive	3	3	Hasan Ali'nin sürdüğü miktarın kaç katı sürdü	hasan alinin sürdüğü miktarın kaç katı sürdü	3	3	3	3
T25	cake	1	6	Problem 1: Elif ile Kübra keklerini birleştirip toplarsa sonuç kaç çıkar?	Problem 1: Elif ile Kübra keklerini birleştirip toplarsa sonuç kaç çıkar?	6	6	6	6
T25	cake	2	4	Problem 2: Mert kekini yemek istemiyor. Kübra ve Elife dağıtırsa onlar 2/8 kaçını yer?	Mert kekini yemek istemiyor. Kübra ve Elife dağıtırsa onlar ?/8 kaçını yer?	5	5	5	5
T25	cake	3	3	Problem 3: Sizce Elif neden fazla yemiştir? Düşüncelerinizi arkadaşınızla paylaşınc	Sizce Elif neden fazla yemiştir? Düşüncelerinizi arkadaşınızla paylaşınız.	3	3	3	3
T26	drive	1	6	Buna göre Hasan kaç km araba sürmüştür?	Buna göre Hasan kaç km araba sürmüştür?	6	6	6	6
T26	drive	2	4	Ali ile Mert'in sürdüğü araba miktarı Çıkartıp Sonucu Hasa'nın sürdüğü ile topbymia.	Ali ile Mert'in sürdüğü araba miktarı çıkartıp Sonucu Hasa'nın sürdüğü ile toplayınız.	4	6	6	6
T26	drive	3	4	Buna göre 3 arkadaşın sürdüğü araba miktarı ile 13'a çıkarın. Sonucu arkadaşınızla paylaşınız.	Buna göre 3 arkadaşın sürdüğü araba miktarı ile 13'ü çıkarın. Sonucu arkadaşınızla paylaşınız.	4	4	4	4
T27	drive	1	6	Mert kaç kilometre sürmüştür arabayı?	Mert kaç kilometre sürmüştür arabayı	6	6	6	6
T27	drive	2	6	Hasan kaç kilometre sürmüş arabayı?	Hasan kaç kilometre sürmüş arabayı	6	6	6	6
T27	drive	3	3	Ali kaç kilometre sürmüştür arabayı?	Ali kaç kilometre sürmüştür arabayı	3	3	3	3
T27	cake	1	6	Elif kaç dilim kek yemiştir	Elif kaç dilim kek yemiştir	6	6	6	6
T27	cake	2	6	Mert kaç dilim kek yemiştir	Mert kaç dilim kek yemiştir	6	6	6	6
T27	cake	3	6	Kübra kaç dilim kek yemiştir	Kübra kaç dilim kek yemiştir	6	6	6	6
T28	drive	1	6	Problem 1: Buna göre hangisi aralayı daha az kullanarak kendine mola ayırmış olur.	Buna göre hangisi arabayı daha az kullanarak kendine mola ayırmış olur.	6	6	6	6
T28	drive	2	6	Problem 2: Ali'nin araba sürme km metresi mi daha fazla ve ya merakinmi yoksa Hasanlımınımıdır hesaplayarak bulunuz.	Ali'nin araba sürme km metresi mi daha fazladır ve ya mert'inmi yoksa Hasan'ınınmıdır hesaplayarak bulunuz.	6	6	6	6
T28	drive	3	3	Problem 3: Hasen Alin'in sürdüğü miktarın 9 katı kadar kullandığına göre handisi daha fazla sürmiş olur,	Hasan Alin'in sürdüğü miktarın 9 katı kadar kullandığına göre hangisi daha fazla sürmüş olur.	6	6	3	3
T28	cake	1	6	Problem 1: Buna göre. Elif'in yediği kek'in miktarını hesapla younık bulunuz,	Buna göre Elif'in yediği kek'in miktarını hesaplayarak bulunuz.	3	3	3	3
T28	cake	2	6	Problem 2: 8 eşit parçaya ayrılan kek'in 4/8 paraaını elit 2/8 Kübra Yedigene göre Kübranın ve Eliflin miktarını hesaplayınız.	8 eşit parçaya ayrılan kek'in 4/8 parçasını elif 2/8 kübra yediğene göre Kübranın ve Elif'in miktarını hesaplayınız.	6	3	3	3
T28	cake	3	6	Problem 3: Hesarladigining qore elif ve kibra'nın sayılars Mert'in ki sine gore da ha fazla olmuşmudur?	Hesapladığınıza göre elif ve kübra'nın sayıları Mert'in kisine göre daha fazla olmuşmudur?	6	6	6	6
T29	drive	1	6	Buna göre Hasan kaç km araba sürmüştür?	Buna göre Hasan kaç km araba sürmüştür?	6	6	6	6
T29	drive	2	3	Ali kaç km araba sürmüştür?	Ali kaç km araba sürmüştür?	3	3	3	3
T29	drive	3	6	Buna göre Hasan ve Ali toplam kaç km araba sürmüştür?	Buna göre Hasan ve Ali toplam kaç km araba sürmüştür?	6	6	6	6
T29	cake	1	6	Elif ve Mert'in yediği toplam kek sayısı Kübra'nın yediği kek sayısından kaç fazladır?	Elif ve Mert'in yediği toplam kek sayısı Kübra'nın yediği kek sayısından kaç fazladır?	6	6	6	6
T29	cake	2	6	Elif ve Kübra'nın yediği kek sayısına göre Mert'e kalan kek sayısı kaçtır?	Elif ve Kübra'nın yediği kek sayısına göre Mert'e kalan kek sayısı kaçtır?	6	6	6	6
T29	cake	3	4	Mert ve Kübra'nın ondalık gösterimini yazınız.	Mert ve Kübra'nın ondalık gösterimini yazınız.	6	6	6	6
T3	drive	1	4	Alini ser diği 80km değil 100km olaydı fazlası kaç olurdu	Alini sürdüğü 80km değil 100km olaydı fazlası kaç olurdu	6	5	5	6
T3	drive	2	6	bir kişi olsaydı kaç km olmalıydı	bir kişi olsaydı kaç km olmalıydı	3	1	3	1
T3	drive	3	3	Alielmasaydı proplem bezkor muydu yoksa bozulmasımıydı	Ali almasaydı proplem bozulur muydu yoksa bozulmasmıydı	1	1	1	1
T3	cake	1	6	buna göre kaş dilim Rek kalmıştır	buna göre kaç dilim kek kalmıştır	6	6	6	6
T3	cake	2	6	elif mert ve kibra aldıkları kek bir dilimi sotidir Sekiz dilim kaç paroeder	elif mert ve kübra aldıkları kek bir dilimi 50 tldir Sekiz dilim kaç para eder	3	5	6	6
T3	cake	3	4	bir kişi dana olsaydı 3 dilim yedi buna göre kaki kaç parçaja kerceklerdi	bir kişi dana olsaydı 3 dilim yedi buna göre keki kaç parçaya kesceklerdi	4	4	4	6
T30	drive	1	6	Hasan'ın ve Mert'in ne kadar sürdüğünü bulunuz.	Hasan'ın ve Mert'in ne kadar sürdüğünü bulunuz.	6	6	6	6
T30	drive	2	6	Bulduğunuz işlemde ne gibi farklılıklar olduğunu ve kimin daha çok, kimin daha az sürdüğünü sıralayınız	Bulduğunuz işlemde ne gibi farklılıklar olduğunu ve kimin daha çok, kimin daha az sürdüğünü sıralayınız	6	6	6	6
T30	drive	3	6	Buna göre kim daha az sürmüşse bir dahaki gezide o daha çok sürmüş olsa kim sürer işlem yaparak bulunuz.	Buna göre kim daha az sürmüşse bir dahaki gezide o daha çok sürmüş olsa kim sürer işlem yaparak bulunuz.	3	3	3	3
T30	cake	1	6	Görsel çizerek soruları cevaplayın Elif'in yediği miktarı bulunuz Mert ve Kübra'nın yediği kek miktarını bulup Elif 'ini yediği kek miktarıyla karşılaştırın.	Görsel çizerek soruları cevaplayın Elif'in yediği miktarı bulunuz Mert ve Kübra'nın yediği kek miktarını bulup Elif 'in yediği kek miktarıyla karşılaştırın.	6	6	6	6
T30	cake	2	3	Buna göre aradaki fark nedir? Siz olsanız bu Konu hakkında ne düşünür dünüz	Buna göre aradaki fark nedir? Siz olsanız bu Konu hakkında ne düşünürdünüz	5	5	5	3
T30	cake	3	4	Gocukların yediği miktası kök yaprak şeklinde yapınız	Çocukların yediği miktarı kök yaprak şeklinde yapınız	4	3	4	4
T31	drive	1	2	mert hasandan 180km az sürmüştür Hasan alinin sürdüğü miktarın 7 katı kadar araba sürmüştür ali 80km araba sürmüştür	mert hasandan 180km az sürmüştür Hasan alinin sürdüğü miktarın 7 katı kadar araba sürmüştür ali 80km araba sürmüştür	2	2	2	2
T31	drive	2	2	mert hasandan 160 km daha az sürmüştür hasan alinin sürdüğü miktarın 8 katı kadar araba sürmüştür ali 80km araba sürmüştür	mert hasandan 160 km daha az sürmüştür hasan alinin sürdüğü miktarın 8 katı kadar araba sürmüştür ali 60km araba sürmüştür	2	2	2	2
T31	drive	3	0			0	0	0	0
T31	cake	1	2	bir kek 10 eşit parçaya ayrılmıştır elifmkekin 6/10 Sinl mert 4/10 Kübra ise 2/10 sini yemiştil	bir kek 10 eşit parçaya ayrılmıştır elif kekin 6/10 sını mert 4/10 ünü Kübra ise 2/10 sini yemiştir	2	2	2	2
T31	cake	2	2	bil kek 6 eşit parcard Lyrılmışece el f keklin 4/6'ünü mert 4/6 kübraise kekin 2/6 Sini yemiştir	bir kek 6 eşit parcaya ayrılmıştır elif kekin 4/6'ünü mert 4/6 ünü kübra ise kekin 2/6 sini yemiştir	2	2	2	2
T31	cake	3	0			0	0	0	0
T32	drive	1	2	Ali, Ha sanve mert birlikte ayı arabayla Hafta sonu tatile Tain gitikleri gezide geridönmektedirler. Mert, Hasandan 230km laz araba sürmüştür sonra 40 kr gitmiş ama m merondan gine. Maldaha fazla sürmüştür Hasan, Ali'nin sürdüğü miktarın 9 katı Hadar sürmüştür	Ali, Hasan ve mert birlikte aynı arabayla Hafta sonu tatile için gitikleri gezide geri dönmektedirler. Mert, Hasan'dan 230km az araba sürmüştür sonra 40 km gitmiş ama mert ondan yine Mert daha fazla sürmüştür Hasan, Ali'nin sürdüğü miktarın 9 katı kadar sürmüştür.	2	2	2	2
T32	drive	2	0			0	0	0	0
T32	drive	3	0			0	0	0	0
T32	cake	1	2	Bir kek 80 eşit parçaya ayrılmıştır. Elif kekin 20/40'ını, Mert 10/40'ını Küdra ise 10/40'ını yemiştir?	Bir kek 80 eşit parçaya ayrılmıştır. Elif kekin 20/40'ini, Mert 10/40'ini Küdra ise 10/40'ini yemiştir?	2	2	2	2
T32	cake	2	2	Bir kek 8 eşit paraaya ayrılmıştır. Elif Kekin 4/8'ini Mert ve Küb ise 2/8'ini yemiştir?	Bir kek 8 eşit parçaya ayrılmıştır. Elif kekin 4/8'ini met ve Küb ise 2/8'ini yemiştir?	2	3	2	2
T32	cake	3	6	Herkez toplam kaç kek yemişlerdir.	Herkez toplam kaç kek yemişlerdir.	6	6	6	6
T33	drive	1	6	Hafta sonu toplam ne kadar yol gelmişlerdir?	Hafta sonu toplam ne kadar yol gelmişlerdir?	6	6	6	6
T33	drive	2	6	Hasan, Ali'den toplam koa km fazla yol araba sürmüştür.	Hasan, aliden toplam kaç km fazla yol araba sürmüştür.	6	6	6	6
T33	drive	3	0			0	0	0	0
T33	cake	1	6	Bir Kek 8 eşit parçaya ayrılmışsa Elif 1/8 ini Mert 1/8 ini Kübra ise 1/8 ini yemiştir. Buna göre Kekin toplam kaçını yemişlerdir?	Bir kek 8 eşit parçaya ayrılmışsa Elif 1/2'sini Mert 1/4'ünü Kübra ise 2/8'sini yemiştir. Buna göre kekin toplam kaçta kaçını yemişlerdir?	6	6	6	6
T33	cake	2	6	Bir Kek 8 eşit parçaya ayrılmıştır, Elif Kekin 1/8 ini, Mert 2/8 ini ve Kübra ise 1/8 ini yemiştir. Bu kek eğerki 8 parçaya değil 20 parçaya bölünseydi Elif, Mert ve Kübra Kekten toplam ne kadar yerdi?	Bir Kek 8 eşit parçaya ayrılmıştır, Elif Kekin'4/8 ini, Mert 2/8'ini ve Kübra ise 2/8'ini yemiştir. Bu kek eğerki 8 parçaya değil 20 parçaya bölünseydi Elif, Mert ve Kübra kekten toplam ne kadar yerdi?	6	6	6	6
T33	cake	3	0			0	0	0	0
T34	drive	1	6	Problem 1: Buna göre Hasan kaç kilometre araba sürmüştür?	Problem 1: Buna göre Hasan kaç kilometre araba sürmüştür?	6	6	6	6
T34	drive	2	6	Problem 2: Mert. Ali'den kaç kilometre daha Fazla sürmüştür?	Mert, Ali'den kaç kilometre daha Fazla sürmüştür?	6	6	6	6
T34	drive	3	4	Problem 3: Mertin araba sürdüzü miktar on dalık şeklinde gösteriniz.	Mertin araba sürdüğü miktar ondalık şeklinde gösteriniz.	4	6	6	4
T34	cake	1	6	Buna göre Kekten kaç dilim kalmıştır?	Buna göre Kekten kaç dilim kalmıştır?	6	6	6	6
T34	cake	2	6	Elif bu kekten 1 dilim yeseydi, Mert'de 3 dilim yeseydi kekten geriye kaç dilim kalır?	Elif bu kekten 1 dilim yeseydi, Mert'de 3 dilim yeseydi kekten geriye kaç dilim kalır?	6	6	6	6
T34	cake	3	4	Kübra'nın kekten yediği dilim sayısını ondalık şeklinde gösteriniz.	Kübra'nın kekten yediği dilim sayısını ondalık şeklinde gösteriniz.	6	6	6	6
T35	drive	1	6	Hasan, Ali ve Mert seferlerini tamamladığında Hasan arabayı bırakmaya geri dönmüştür. Hasan kaç km yol gitmiştir?	Hasan, Ali ve Mert seferlerini tamamladığında Hasan arabayı bırakmaya geri dönmüştür. Hasan kaç km yol gitmiştir?	5	5	5	5
T35	drive	2	5	Bu üç arkadaş ne kadar yol gittiklerini hesaplıyorlar. Sonrasında ise sürüş miktarlarını hesaplıyorlar. Ve eskiden yaptıkları hesaplamalarının yanlış olduğunu anlıyorlar. Hasan, Mert'ten 210km fazla sürmüştür. Ali ise 2 katı kadar sürmüştür. Ali ise kaç km sürmüştür?	Bu üç arkadaş ne kadar yol gittiklerini hesaplıyorlar. Sonrasında ise sürüş miktarlarını hesaplıyorlar. Ve eskiden yaptıkları hesaplamalarının yanlış olduğunu anlıyorlar. Hasan, Mert'ten 210km fazla sürmüştür. Ali ise 2 katı kadar sürmüştür. Ali ise kaç km sürmüştür?	5	5	5	5
T35	drive	3	4	Buna göre en fazla ve en az araba sürenlerin farkının katı bulunuz.	Buna göre en fazla ve en az araba sürenlerin farkının 8 katını bulunuz.	5	5	6	6
T35	cake	1	4	Problem 1: Herkes bir arkadaşının kekinden bir dilim almıştır. (Bir kişiden birden fazla dilim alınamamaktadır.) Mert'in kaç dilim yemiştir?	Problem 1: Herkes bir arkadaşının kekinden bir dilim almıştır. (Bir kişiden birden fazla dilim alınamamaktadır.) Mert'in kaç dilim yemiştir?	6	5	6	5
T35	cake	2	4	Problem 2: Elif'in kekinin parçaları eşit bölünmemiştir. Mert'in kekinin parçaları da eşit bölünmemiştir. Kübra'nın ise kekin kır eş sekiz parçaya bölünmüştür. Elif 3 parça kek dilimi yese ne kadar dilim yemiş olur?	Elif'in kekinin parçaları eşit bölünmemiştir. Mert'in kekinin parçaları da eşit bölünmemiştir. Kübranın ise keki eş sekiz parçaya bölünmüştür. Elif 3 parça kek dilimi yese ne kadar dilim yemiş olur?	3	3	3	3
T35	cake	3	4	Problem 3: Buna göre çocuklar kekten bir dilim yemezseler ne kadar yemiş olurlar?	Problem 3: Buna göre çocuklar kekten bir dilim yemezseler ne kadar yemiş olurlar?	5	6	5	6
T36	drive	1	6	Toptan kaç km sütmişlerdir?	Toplam kaç km gitmişlerdir?	6	6	6	6
T36	drive	2	5	Yolun yorisi 5 saatse geri balan you'da kah saat sitestery	Yolun yarısı 5 saatse geri kalan yol'da kaç saat giderler?	6	6	6	6
T36	drive	3	6	Arabayı enfazler kim sürmüştür?	Arabayı en fazla kim sürmüştür?	6	6	6	6
T36	cake	1	6	Bu durumda Elif, Mert ve Kübra toplam besia kek yemiştir.	Bu durumda Elif, Mert ve Kübra toplam kaç kek yemiştir.	2	2	6	6
T36	cake	2	5	Lek 122 parha olsaydı selin ne lepdor yemistir?	kek 12 parça olsaydı selin ne kadar yemistir?	5	5	5	5
T36	cake	3	2	Merk yediğine söre selln nie bieden geniştir?	Mert 2/8' yediğine göre selin ne kadar yemiştir?	3	1	3	5
T37	drive	1	6	Buna göre Hasan kaç km araba sürmüştür?	Buna göre Hasan kaç km araba sürmüştür?	6	6	6	6
T37	drive	2	6	Mert, Hasan ve Ali toplam kaç km yol almışlardır?	Mert, Hasan ve Ali toplam kaç km yol almışlardır?	6	6	6	6
T37	drive	3	2	Mert, Hasan ve Ali toplam kaç m yol almıştır?	Mert, Hasan ve Ali toplam kaç m yol almıştır?	6	6	6	6
T37	cake	1	6	Elis, Mert ve Kübranın kekin yüz de kaçını yediğini bulunuz,	Elif, Mert ve Kübra'nın kekin yüz de kaçını yediğini bulunuz.	6	6	6	6
T37	cake	2	3	Rekten en fazla parça Elif ye- diğine göre kekin kaçta kaçını yemiştir?	Kekten en fazla parça Elif yediğine göre elif kekin kaçta kaçını yemiştir?	3	3	3	3
T37	cake	3	5	Kek 10 eşit parçaya ayrılsay- d. Elif, Mert ve Kübra kaç eşit parça kek yemiş olurlardı?	Kek 10 eşit parçaya ayrılsaydı Elif, Mert ve Kübra kaç eşit parça kek yemiş olurlardı?	6	6	6	6
T38	drive	1	6	Problem 1: Ali, hasan ve Mert hafta sonu tatilden geri dönecekler di ve Eve döndüklerinde Mert hasandan 240 km.az afaba surmüş. Hasan ve alinin 9 katı kadur arabasürmüştur, ali ise 80 kmaraba sürmüştür Buna göre Melt kaç km araba sürmüştü?	Ali, hasan ve Mert hafta sonu tatilden geri döneceklerdi ve Eve döndüklerinde Mert, hasandan 240 km az araba sürmüş. Hasan ve ali'nin 9 katı kadar araba sürmüştür, ali ise 80 km araba sürmüştür Buna göre Mert kaç km araba sürmüştür?	6	6	6	6
T38	drive	2	6	Problem 2: Haftasonu tatilden geldiklerinde Hasan, Alinin 9 katı katur afceba sürmuştür Ali ise 80 km araba sürmüştür. Buna göre Hasan Kaç km araba sötmüştur	Haftasonu tatilden geldiklerinde Hasan, Alinin 9 katı kadar araba sürmuştür Ali ise 80 km araba sürmüştür. Buna göre Hasan kaç km araba sürmüştür	6	6	6	6
T38	drive	3	6	Problem 3: Mer, Hasan ve Ali Hafta sonu tatilden döndüklerinde Mert, hasanda 240km azalaba sürmüs Hascen ile alinin surdüğü miktar 9 katı, Ali ise 80 ton sormüştür bepsinin to plan kaç km sürmüştor?	Mer, Hasan ve Ali Hafta sonu tatilden döndüklerinde Mert, hasanda 240km az araba sürmüş Hasan ile alinin sürdüğü miktar 9 katı, ali ise 80 km sürmüştür hepsinin toplam kaç km sürmüştür?	6	6	6	6
T38	cake	1	5	Bir kek 8 eşit Parçaya ayrılmıştır elif kelkin 3/8'ünü, mert 2/8'ini, kübra 2/8 yediyse bunlar eger restoranta giderler se kaç ₺ öderler?	Bir kek 8 eşit parçaya ayrılmıştır elif kekin 4/8'ünü, mert 2/8'ini, kübra 2/8 yediyse bunlar eğer restoranta giderlerse kaç tl öderler?	4	4	4	4
T38	cake	2	3	Elif kekin 3/8'ini yediyse, Merte onun yarısını yemiştir. O zaman Mert kekten kaçını yemiştir?	Elif kekin 4/8'ini yediyse, Merte onun yarısını yemiştir. O zaman Mert kaçta kaçını yemiştir?	6	6	6	6
T38	cake	3	6	Elif 8 parçaya bölünen bir kekin 3/8'ünü, Mert ise 2/8'sini, Kübra ise 2/8'sini yemiştir. Buna göre ne kadar kek kalmıştır?	Elif 8 parçaya bölünen bir kekin 4/8'ünü, Mert ise 2/8'sini, kübra ise 2/8'sini. Buna göre ne kadar kek kalmıştır	6	6	6	6
T39	drive	1	6	Problem 1: Hasan kaç km araba sürmüstür?	Problem 1: Hasan kaç km araba sürmüstür?	6	6	6	6
T39	drive	2	4	Problem 2: Mert'in sürdüğü kimji 8 ile çarpınız. Bulduğunuz sonuçla Alinin sürdüğü km'yi toplayınız.	Mert'in sürdüğü km'yi 8 ile çarpınız. Bulduğunuz sonuçla Ali'nin sürdüğü km'yi toplayınız.	4	4	4	4
T39	drive	3	6	Problem 3: Ali, Hasan ve Mert aynı yolu 7 defa tekrar etseydi kaç km gitmis olacaklardı?	Problem 3: Ali, Hasan ve Mert aynı yolu 7 defa tekrar etseydi kaç km gitmis olacaklardı?	6	6	6	6
T39	cake	1	5	Mert kekini yediği zaman kaç dilim kek kalındı?	Mert kekini yediği zaman kaç dilim kek kalırdı?	6	5	6	5
T39	cake	2	6	Kübra ile Elif keklerini yediği zaman kaç tane kek dilimi kalmıştır?	Kübra ile Elif keklerini yediği zaman kaç tane kek dilimi kalmıştır?	6	6	6	6
T39	cake	3	6	Mert ve Elif eğer kek yemeseydi kaç tane kek dilimi kalacaktı?	Mert ve Elif eğer kek yemeseydi kaç tane kek dilimi kalacaktı?	6	6	6	6
T4	drive	1	6	Problem 1: Ali, Hasan ve Mert'lerin gittikleri yol kaç km dir?	Problem 1: Ali, Hasan ve Mert'lerin gittikleri yol kaç km dir?	6	6	6	6
T4	drive	2	6	Problem 2: 100 km başı 10L mazot gidiyorsa yolu tamamlamak için kaç litre mazot gerekir.	Problem 2: 100 km başı 10L mazot gidiyorsa yolu tamamlamak için kaç litre mazot gerekir.	6	6	6	6
T4	drive	3	6	Problem 3: Mert, Hasan ve Ali'nin kaç km araba Sürdüğünü yazınız.	Mert, Hasan ve Ali'nin kaç km araba sürdüğünü yazınız.	6	6	6	6
T4	cake	1	6	Problem 1: Bir kek 8 eşit parçaya ayrılmıştır. Elif kekin 4/8'ini, Mert 3/8'ini ve Kübra ise 2/8'ini yemiştir. Buna göre Mert ve Kübra 4 eşit parça yemek için bir keki kaç eşit parçayo ayır malıyız.	Bir kek 8 eşit parçaya ayrılmıştır. Elif kekin 4/8'ini, Mert 2/8'ini ve Kübra ise 2/8'ini yemiştir. Buna göre Mert ve Kübra 4 eşit parça yemek için bir keki kaç eşit parçaya ayırmalıyız.	4	4	5	4
T4	cake	2	4	Problem 2: Elif, Mert ve kübranın yediği kek sayılarını ondadık gösterime çeviriniz.	Elif, Mert ve kübra'nın yediği kek sayılarını ondadık gösterime çeviriniz.	6	6	6	6
T4	cake	3	2	Problem 3: Çevirdiğiniz ondalık gösterimlerimi toplayıp ikiye bölünüz.	Çevirdiğiniz ondalık gösterimlerini toplayıp ikiye bölünüz.	6	6	6	4
T40	drive	1	6	Buna göre hasan Ali'den kaça kom fazla surmustury	Buna göre hasan Ali'den kaç km fazla sürmüştür?	6	6	6	6
T40	drive	2	6	Hasanın Ali'den kaç km fazla olduğunu bilmek için hangi işlemi yaparız?	Hasan'ın Ali'den kaç km fazla olduğunu bilmek için hangi işlemi yaparız?	6	6	6	6
T40	drive	3	6	Ali ile hasan toplam kaç kim ataba surmuşlerdir?	Ali ile hasan toplam kaç km araba sürmüşlerdir?	6	6	6	6
T40	cake	1	6	Elif, Mert ve Kübra toplam kekin kaçtarkaçını yemiştir?	Elif, Mert ve Kübra toplam kekin kaçta kaçını yemiştir?	6	6	6	6
T40	cake	2	6	Kek 16 Parçaya bölünseydi herkese kaçar tane Paraa düşerdi?	Kek 16 parçaya bölünseydi herkese kaçar tane Parça düşerdi?	6	6	6	6
T40	cake	3	5	Kişilere eşit dilim dağıtılsaydı her birine kaa tare diserdi?	Kişilere eşit dilim dağıtılsaydı her birine kaç tane düşerdi?	6	6	6	6
T5	drive	1	6	has an Kuş km araba Sürmüştür	hasan Kuş km araba sürmüştür	6	6	6	6
T5	drive	2	6	Mert Kuş km araba sürmüştür.	Mert Kuş km araba sürmüştür.	6	6	6	6
T5	drive	3	3	Ali Kuş km araba sürmüştür.	Ali Kuş km araba sürmüştür.	3	3	3	3
T5	cake	1	2	Problem 1: buna göre bpi kek 8 Porçaya bölün - düğüne göre 2/8 elif 2/8 mert kübra 2/8 Jeriye Kalan 2 tonesi ise 3 'e ayı- rarak bölüştürürün	buna göre bir kek 8 Parçaya bölündüğüne göre 2/8 elif 2/8 mert kübra 2/8 geriye Kalan 2 tanesi ise 3 'e ayırarak bölüştürürüz	2	2	2	2
T5	cake	2	2	Problem 2: Eger bu kek on eşit Par Caya bölinitos Condalid kesril Yoporak ayılırız	buna göre bir kek 8 Parçaya bölündüğüne göre 2/8 elif 2/8 mert kübra 2/8 geriye Kalan 2 tanesi ise 3 'e ayırarak bölüştürürüz	2	2	2	2
T5	cake	3	0			0	0	0	0
T6	drive	1	2	Hasan, Ali 'nin sürdüğů miktarın 9 katı kadar araba sürmüştür	Hasan, Ali 'nin sürdüğů miktarın 9 katı kadar araba sürmüştür	2	2	2	2
T6	drive	2	2	Ali Hasan ve mert birlikte aynı araba yla hafta sonu tatili için gittikleri geziden geri dönmektedirler.	Ali Hasan ve mert birlikte aynı arabayla hafta sonu tatili için gittikleri geziden geri dönmektedirler.	2	1	2	1
T6	drive	3	2	Dönüşümlü olarak araba ya kullanarak yolculuğu tamamlamış Zardır	Dönüşümlü olarak araba ya kullanarak yolculuğu tamamlamışlardır	2	2	2	2
T6	cake	1	2	Problem 1: bir kek 8 esit parçaya ayrılmıştım elif kekin 4/8'ini	bir kek 8 esit parçaya ayrılmıştır. elif kekin 4/8'ini	2	2	2	2
T6	cake	2	2	Problem 2: Mert 2/8'ini	Problem 2: Mert 2/8'ini	2	2	2	2
T6	cake	3	2	Problem 3: kübra ise 2/8'ini	ve kübra ise 2/8'ini	2	2	2	2
T7	drive	1	6	Ali, Hasan ve Mert birlikte kaç km yol almışlardır?	Ali, Hasan ve Mert birlikte kaç km yol almışlardır?	6	6	6	6
T7	drive	2	6	En çok kim yol almıştır?	En çok kim yol almıştır?	6	6	6	6
T7	drive	3	6	En çok yol alan ile en az yol alan arasındaki fark kaçtır?	En çok yol alan ile en az yol alan arasındaki fark kaçtır?	6	6	6	6
T7	cake	1	6	Problem 1: Buna göre bu kekin kaçta kaçı yenilmiştir?	Problem 1: Buna göre bu kekin kaçta kaçı yenilmiştir?	6	6	6	6
T7	cake	2	6	Problem 2: Kekten en çok kim yemiştir?	Problem 2: Kekten en çok kim yemiştir?	6	6	6	6
T7	cake	3	5	Problem 3: Kekten herkes eşit miktarda yeseydi kişi başına nekadar kek düşerdi?	Problem 3: Kekten herkes eşit miktarda yeseydi kişi başına nekadar kek düşerdi?	6	6	6	6
T8	drive	1	1	Problem 1: Zeynep ve Asel Sabahın köründe yola çıkacaktır. 180 km Zeynep Asel ise 725/300 km sürmüştür.	Zeynep ve Asel Sabahın köründe yola çıkacaktır. 180 km Zeynep Asel ise 129/300 km sürmüştür.	2	1	2	1
T8	drive	2	1	Problem 2: Bir iş yerinde araba surme yarışı olacaktırı 2 liki yarışacaktır. Basri'nin 51/200 sürmiatür Ali ise 80/yoo km sürmüştür.	Bir iş yerinde araba sürme yarışı olacaktır. 2 kişi yarışacaktır. Basri 51/100 sürmiştür Ali ise 80/100 km sürmüştür.	2	1	2	2
T8	drive	3	1	Problem 3: Bir benzinlikte 1000 km yapana 800 € verilecektir. Mehmet yolun 200/1000'de kaldı Melis ise 300/1000'de porida kalmıştır.	Bir benzinlikte 1000 km yapana 800 ₺ verilecektir. Mehmet yolun 200/1000'de kaldı Melis ise 300/1000'de yarıda kalmıştır.	1	1	1	1
T8	cake	1	2	Problem 1: Bir ekmek 5 parçaya ayrılmıştır. Ecrin ekmeğin 1/8'ini Rüya 3/8 Beren ise 7/8'ini yemiştir.	Bir ekmek 5 parçaya ayrılmıştır. Ecrin ekmeğin 1/8'ini Rüya 3/8 Beren ise 1/8'ini yemiştir.	2	2	2	2
T8	cake	2	2	Problem 2: Bir Kuruyemia Mağazasında 4 farklı kategori yer almaktadır. Badem, Kaju, fındık ve fıstıktır. Ahmet fındığın 1/4'ini Zeynep fıstığın 1/4'ini Sabri kajunun 1/4 mer ise Bademin 1/4'ini almıştır.	Bir Kuruyemiş mağazasında 4 farklı kategori yer almaktadır. Badem, Kaju, fındık ve fıstıktır. Ahmet fındığın 1/4'ini Zeynep fıstığın 1/4'ini Sabri kajunun 1/4 mer ise Bademin 1/4'ini almıştır.	2	2	2	2
T8	cake	3	2	Problem 3: Bir reçel 8 kaseyey ayrılmıştır. Yakup reçelin 2/8'ini almıştır.Semih ise 4/8'ini almıştır.	Bir reçel 8 kaseye ayrılmıştır. Yakup reçelin 4/8'ini almıştır.Semih ise 4/8'ini almıştır.	2	2	2	2
T9	drive	1	6	Buna göre en fazla km yi sürmüş tür.	Buna göre en fazla km yi sürmüştür.	2	2	2	2
T9	drive	2	6	hemsinin km kaa eder.	hemsinin km kaç eder.	6	6	6	6
T9	drive	3	6	Buna göre Ali, hason ve mertlin km sını büyükten kúaüge Sıralayınız	Buna göre Ali, hasan ve mert'in km sini büyükten küçüge sıralayınız	6	6	6	6
T9	cake	1	6	Problem 1: Kübra buna göre kaç dilim kek Yemiştir.	Problem 1: Kübra buna göre kaç dilim kek Yemiştir.	6	6	6	6
T9	cake	2	6	Problem 2: En fazla kek dilimini kim Yemiştir	Problem 2: En fazla kek dilimini kim Yemiştir	6	6	6	6
T9	cake	3	6	Problem 3: küçükten büyüğe sıralayınız	Problem 3: küçükten büyüğe sıralayınız	6	6	6	6
U1	drive	1	3	buna göre herkes exit you katetrismidir	buna göre herkes eşit yol katetmişmidir	6	6	6	6
U1	drive	2	6	buna göre you toplam kaç km'dir.	buna göre yol toplam kaç km'dir.	6	6	6	6
U1	drive	3	6	buna göre Mert kaç km sürmüştür?	buna göre Mert kaç km sürmüştür?	6	6	6	6
U1	cake	1	6	buna göre kek kalmışmıdır?	buna göre kek kalmışmıdır?	6	6	6	6
U1	cake	2	3	buna göre herkese eşit dağıtılmışmıdır?	buna göre herkese eşit dağıtılmışmıdır?	6	6	6	6
U1	cake	3	0			0	0	0	0
U10	drive	1	6	Buna göre Mert kaç km araba sürmüştür?	Buna göre Mert kaç km araba sürmüştür?	6	6	6	6
U10	drive	2	6	Buna göre en fazla araba süren kimdir?	Buna göre en fazla araba süren kimdir?	6	6	6	6
U10	drive	3	6	Bu üç kişi toplam kaç km araba sürmüştür?	Bu üç kişi toplam kaç km araba sürmüştür?	6	6	6	6
U10	cake	1	6	Buna göre kaç dilim kek kalmıştır?	Buna göre kaç dilim kek kalmıştır?	6	6	6	6
U10	cake	2	6	En fazla kek yiyen kişi kimdir?	En fazla kek yiyen kişi kimdir?	6	6	6	6
U10	cake	3	5	Kek kaç parçaya bölünseydi herkes eşit yemiş olur?	Kek kaç parçaya bölünseydi herkes eşit yemiş olur?	6	6	6	6
U11	drive	1	4	Buna göre Hasan ve Mert'in sürdüğü km miktarının çarpımı nedir?	Buna göre Hasan ve Mert'in sürdüğü km miktarının çarpımı nedir?	6	4	6	4
U11	drive	2	6	Buna göre bu arabanın başlangıçta 10L benzini varsa ve her 50 km'de 15ml benzin kaybediyorsa en son kalan benzin miktarı kaç olur?	Buna göre bu arabanın başlangıçta 10L benzini varsa ve her 50 km'de 15ml benzin kaybediyorsa en son kalan benzin miktarı kaç olur?	6	6	6	6
U11	drive	3	6	Buna göre en çok araba süren kişi hiç sürmeseydi yol kaç km olurdu?	Buna göre en çok araba süren kişi hiç sürmeseydi yol kaç km olurdu?	6	6	6	6
U11	cake	1	6	Buna göre Elif ve Mert keklerinin yarısının bayat olduğunu fark edip yemezse toplam ne kadar kek yenir?	Buna göre Elif ve Mert keklerinin yarısının bayat olduğunu fark edip yemezse toplam ne kadar kek yenir?	6	6	6	6
U11	cake	2	4	Buna göre özdeş bir kek daha yapılıp bu sefer Mert 4/8, Kübra 1/8 ve Elif 3/8'ini yerse herkesin toplam yediği kek miktarının çarpımı ne olur?	Buna göre özdeş bir kek daha yapılıp bu sefer Mert 4/8, Kübra 1/8 ve Elif 3/8'ini yerse herkesin toplam yediği kek miktarının çarpımı ne olur?	6	4	6	4
U11	cake	3	4	Buna göre bir kişi daha gelip Mert'in kekinin yarısını ve Kübranın kekinin 3/8'ini yerse bu kişi ne kadar kek yemiş olur?	Buna göre bir kişi daha gelip Mert'in kekinin yarısını ve Kübranın kekinin 3/8'ini yerse bu kişi ne kadar kek yemiş olur?	4	4	4	4
U2	drive	1	6	Problem 1: Buna göre Hasan kaç km Araba sürmüştür?	Problem 1: Buna göre Hasan kaç km Araba sürmüştür?	6	6	6	6
U2	drive	2	6	Problem 2: Buna göre Mert ile Ali'nin arasında toplam kaç km vardır?	Problem 2: Buna göre Mert ile Ali'nin arasında toplam kaç km vardır?	4	4	4	4
U2	drive	3	6	Problem 3: Bu kişileri toplam kaç km araba kullanmıştır?	Bu kişiler toplam kaç km araba kullanmıştır?	6	6	6	6
U2	cake	1	6	Problem 1: Buna göre en fazla kim kek yemiştir?	Problem 1: Buna göre en fazla kim kek yemiştir?	6	6	6	6
U2	cake	2	4	Problem 2: Buna göre Kübra'nın yediği kekin yarısı bayat çıktığında kaç kek dilimi kalır?	Buna göre Kübranın yediği kekin yarısı bayat çıktığında kaç kek dilimi kalır?	4	4	4	4
U2	cake	3	6	Problem 3: Bu durumda Mert'in ve Kübra'nın yediği kek sayısı kaçta kaçıdır?	Problem 3: Bu durumda Mert'in ve Kübra'nın yediği kek sayısı kaçta kaçıdır?	6	6	6	6
U3	drive	1	6	Problem 1: Hasan kaç km afoba sürmüştür?	Hasan kaç km araba sürmüştür?	6	6	6	6
U3	drive	2	6	Problem 2: En çok kim araba kullanmış?	Problem 2: En çok kim araba kullanmış?	6	6	6	6
U3	drive	3	6	Problem 3: Bu kişiler toplarakoç kim alaba kullandılar?	Bu kişiler toplam kaç km araba kullandılar?	6	6	6	6
U3	cake	1	6	Elif ve Mest to Plam kaç Parça kek yeniş-lesdir?	Elif ve Mert toplam kaç parça kek yemişlerdir?	6	6	6	6
U3	cake	2	6	Elif, Mertten ne kadar fazla Parça kek yemiştir?	Elif, Mertten ne kadar fazla parça kek yemiştir?	6	6	6	6
U3	cake	3	6	Kübra, Eliften koa Parçalı daha az yeniştipp	Kübra, Elif'ten kaç Parça daha az yemiştir?	6	6	6	6
U4	drive	1	6	Mert arabayı kaç km sürmüştür?	Mert arabayı kaç km sürmüştür?	6	6	6	6
U4	drive	2	6	Hasan arabayı kaç km sürmüştür?	Hasan arabayı kaç km sürmüştür?	6	6	6	6
U4	drive	3	6	Ali yolun kaçta kaçını sürmüştür?	Ali yolun kaçta kaçını sürmüştür?	6	6	6	6
U4	cake	1	6	Kekten geriye kalmışmıdır yoksa kalmamışmıdır? Eğer kaldı ise ne kadar kalmıştır?	Kekten geriye kalmışmıdır yoksa kalmamışmıdır? Eğer kaldı ise ne kadar kalmıştır?	6	6	6	6
U4	cake	2	6	Bu kekten kimler kaç dilim yemiştir?	Bu kekten kimler kaç dilim yemiştir?	6	3	6	3
U4	cake	3	3	Kimler kekten eşit şekilde yemiştir?	Kimler kekten eşit şekilde yemiştir?	6	6	6	6
U5	drive	1	3	Ali, Hasan. Mert Ali arabayı 80km Hasan Alinia głat Guzla Mert isz 240 ba az sürdü buna göre mert uc basen kaç ky sürdü	Ali, Hasan. Mert Ali arabayı 80 km Hasan Alinin 9 kat fazla Mert ise 240 km az sürdü buna göre mert ve hasan kaç kg sürdü	6	6	4	4
U5	drive	2	3	Ali 80 kg hasan Alinin sisduğumín og kot fiz la met mourboun 240 kut az sormistor bunları büyükten kacig sirlayınız	Ali 80 kg hasan Alinin sürdüğünün 9 kat fazla met hasandan 240 kat az sürmüstür bunları büyükten küçüğe sıralayınız	6	6	4	6
U5	drive	3	5	pl hasan remert bir ata bayı Süldüğünde kaç saatte gitçekleri gere ulaşmışlardır	Ali hasan ve mert bir arabayı sürdüğünde kaç saatte gitçekleri yere ulaşmışlardır	5	5	5	5
U5	cake	1	6	Bir kek sekiz parçaya ayrılmıştır Elif ekekten 4/8 yiyorsa Kübrada 2/8 sizor ikisinin toplamı kaçtır?	Bir kek sekiz parçaya ayrılmıştır Elif o kekten 4/8 yiyorsa Kübrada 2/8 yiyor ikisinin toplamı kaçtır?	6	6	6	6
U5	cake	2	6	Mert ve Elif bir pasta alır çünkü Kübra'nın doğum günüdür. Mert 2/8 Elif 4/8 Kübra da 3/8 yemiştir. Bunları küçükten büyüğe sıralayınız.	Mert ve Elif bir pasta alır çünkü Kübra'nın doğum günüdür. Mert 2/8 Elif 4/8 Kübra da 2/8 yemiştir bunları küçükten büyüğe sıralayınız.	6	6	6	6
U5	cake	3	3	Elif Mert ve Kübra pasta yaparlar. Pastayı 8'e bölerler. Elif 4/8, Mert 2/8, Kübra da 3/8 yer. Toplam payının sonucu kaçtır?	Elif Mert ve Kübra pasta yaparlar. Pastayı 8'e bölerler. Elif 4/8, Mert 2/8, Kübra da 2/8 yer. toplam bepinin sonucu kaçtır	4	4	6	6
U6	drive	1	3	Problem 1:Ali, Hason ve Mert birlikte şehir dışına çıkıyor ve gititeleri yerden geri dönmektedirler. Dönüşümlü dorok Aroboy, kulmorak jolculu Ju tamamlamışlardır. Mest, Hosenen den 240 km az araba sürmüştür Hosen, Alider sürdüğü mikter, 19ı katı koder oraba sürmüştür. Alisien koalem araba sürmüştür	Ali, Hasan ve Mert birlikte şehir dışına çıkıyor. ve gitikleri yerden geri dönmektedirler. Dönüşümlü olarak Arabayı kulanarak yolculuğu tamamlamışlardır. Mert, Hasan dan 240 km az araba sürmüştür Hasan, Ali sürdüğü miktarı 9 katı kadar araba sürmüştür. Ali kaç km araba sürmüştür	5	2	5	5
U6	drive	2	6	Problem 2: Ali, Hosan ve Mert birlikte oroboyla hafta sonu tatili için gittikleri geziden geri dönmektedirler. Dönüşümlü darah arabaya kullanarak yolculuğu tamamlamışlardır Mert, Hasan'dan 240km anz oroba sürmüştür Hoson, Alinin sürdüğü micterrın gokat, kader araba sürmüştür toplom koa km araba Sürmüşlerdir	Ali, Hasan ve Mert birlikte aynı arabayla hafta sonu tatili için gittikleri geziden geri dönmektedirler. Dönüşümlü olarak arabaya kullanarak yolculuğu tamamlamışlardır Mert, Hasan'dan 240km az araba sürmüştür Hasan, Ali'nin sürdüğü miktarın 9 katı, kadar araba sürmüştür toplam kaç km araba sürmüşlerdir	5	5	5	5
U6	drive	3	0			0	0	0	0
U6	cake	1	2	Bir Pizza 8 parçaya ayrılmıştır. Nil 4/8 'ini, Güderer 2/8 'ini ve Berra 2/8 'ini yemiştir	Bir Piza 8 parçaya ayrılmıştır. Nil 4/8 'ini, Güderer 2/8 'ini ve Berra da 2/8 'ini yemiştir	2	2	2	2
U6	cake	2	3	Bir Pastayı, 8 Parçaya bölen kübra 4/8'ini Mert., 2/8 Elife a 2/8'inide Beyzaya vermiştir Buna göre Toplam kaç dilim Elif kaldı.	Bir Pastayı 8 Parçaya bölen kübra 4/8'ini Mert, 2/8 Elife 2/8'inide Beyzaya vermiştir Buna göre toplam kaç dilim Elif kalır.	6	6	6	6
U6	cake	3	6	Bir Pastayı, 8 Parçaya ayrılmıştır. kübra 4/8 'ini Mert 2/8, Elife vermiştir toplam kaç Parça yemişlerdir.	Bir pastayı 8 parçaya ayrılmıştır. kübra 4/8 'ini Mert 2/8, 2/8 elife vermiştir toplam kaç parça yemişlerdir.	6	4	6	6
U7	drive	1	6	Hasan Ali'nin sürdüğü miktarın 9. katı kadarse. Hason kac km aroba sörmöstör?	Hasan Ali'nin sürdüğü miktarın 9 katı kadarsa. Hasan kac km araba sürmüstür?	6	6	6	6
U7	drive	2	6	Mert, Hasan ve Ali toplam Lac km oroba sürmastar!	Mert, Hasan ve Ali toplam kac km araba sürmüstür?	6	6	6	6
U7	drive	3	3	Buna göre Hasan'ın Sördüğü kem Sayısıyla Mert in sürdüğüs miktann forlu kaçtır?	Buna göre Hasan'ın sürdüğü km sayısıyla Mert'in sürdüğü miktarın farkı kaçtır?	6	3	3	3
U7	cake	1	3	Bir kekin Elif 4/8'ini, Mert 2/8'ini ve Kübra 2/8'ini yemiştir. Buna göre kek kaç parçaya bölünmüştür?	Bir kekin Elif 4/8'ini, Mert 2/8'ini ve Kübra 2/8'ini yemiştir. Buna göre kek kaç parçaya bölünmüştür?	3	3	3	3
U7	cake	2	6	Bu kekte Kübra ve Elif'in yediği parçaların toplamı kaçtır?	Bu kekte Kübra ve Elif'in yediği parçaların toplamı kaçtır?	6	6	6	6
U7	cake	3	6	Mert ve Kübra eşit yediyse Elif'in yediği kek. Mert ve Kübra'dan kaç fazla yemiştir?	Mert ve Kübra eşit yediyse Elif'in yediği kek Mert ve Kübra'dan kaç fazla yemiştir?	6	6	6	6
U8	drive	1	6	Buna göre Mert ve Hasan ne kadar araba sürmüştür	Buna göre Mert ve Hasan ne kadar araba sürmüştür	6	6	6	6
U8	drive	2	3	Bu bilgiye göre Mert hasan dan kaç km fazla sürmüştür	Bu bilgiye göre Mert hasandan kaç km fazla sürmüştür	4	4	4	4
U8	drive	3	4	Buna göre südükleri km'nin araşındaki fark kaçtır	Buna göre sürdükleri km'nin arasındaki fark kaçtır	5	5	5	5
U8	cake	1	6	Bu bilgiye göre Elif, Mert ve kübra ne kadar pasta yemiştir	Bu bilgiye göre Elif, Mert ve kübra ne kadar pasta yemiştir	3	6	3	6
U8	cake	2	6	Buna göre hekten geriye ne kadar kalmıştır	Buna göre kekten geriye ne kadar kalmıştır	6	6	6	6
U8	cake	3	6	Buna göre kekten en faele yiyen kimdir	Buna göre kekten en fazla yiyen kimdir	6	6	6	6
U9	drive	1	6	Ali 80 km araba sürdüyse Mert ve Hasan kaç km araba sürmüştür?	Ali 80 km araba sürdüyse Mert ve Hasan kaç km araba sürmüştür?	6	6	6	6
U9	drive	2	4	Ali'nin 9 katı nedir?	Ali'nin 9 katı nedir?	6	6	6	6
U9	drive	3	0			0	0	0	0
U9	cake	1	6	Elif ile mertin arasında kaç fark vardır?	Elif ile mertin arasında kaç fark vardır?	6	6	6	6
U9	cake	2	6	Elif, mert, kübra ne kadar yemişlerdir?	Elif, mert, kübra ne kadar yemişlerdir?	3	3	3	3
U9	cake	3	6	Kim daha çok kek yemiştir.	Kim daha çok kek yemiştir.	6	6	6	6
V1	drive	1	6	Buna göre Hasan kaç km araba sürmüştür.	Buna göre Hasan kaç km araba sürmüştür.	6	6	6	6
V1	drive	2	6	Buna göre Mert kaç km araba sürmüştür	Buna göre Mert kaç km araba sürmüştür	6	6	6	6
V1	drive	3	6	Buna göre toplam kaç km yol gitmişlerdir.	Buna göre toplam kaç km yol gitmişlerdir.	6	6	6	6
V1	cake	1	6	Problem 1: Kübra doğum gününde arkadaşırı Elif ve Mert'i de çoğırmatı.Toplom 8 porçaya bölünen kekiten Elif 8/ü Mert ve Kübra ise 2/8'ini yemiştir. Buna göre kekten en fazla kim yemiştir?	Kübra doğum gününde arkadaşları Elif ve Mert'i de çağırmıştı.Toplam 8 parçaya bölünen kekten Elif 4/8'ü Mert ve Kübra ise 2/8'ini yemiştir. Buna göre kekten en fazla kim yemiştir?	6	6	6	6
V1	cake	2	6	Problem 2: Mert partisinde Elif ve Kübra'yı çağırmıştır. Pastayı 8 parçaya bölmüşlerdir ve Mert kekin 2/8'ini Elif 4/8'ü ve Kübra da 2/8'ini yemiştir. buna göre Mert koç tone doha yaseydi pastonın yarısını yemiş olur?	Mert partisinde Elif ve Kübra'yı çağırmıştır. Pastayı 8 eş parçaya bölmüşlerdir ve Mert kekin 2/8'ini Elif 4/8'ü ve Kübra da 2/8'ini yemiştir. buna göre Mert kaç tane daha yeseydi pastanın yarısını yemiş olur?	6	6	6	6
V1	cake	3	5	Problem 3: Elif misofirliğe giderken pasto almitit. Misofirlikte Rübro ve Mert de gelmiştir. Elif 4/8 Kübra ve Mert ise 2/8'sini yemiştir. Babolorida bir pasta getirmiştir. Elif 4/8'ni Mert 2/8'ü Kübra ise 2/8'ü yemiştir. Buna göre çocullor toplam koç posta dilimi yemiştir.	Elif misafirliğe giderken pasta almıştır. Misafirlikte Kübra ve Mert de gelmiştir. Elif 4/8'ü Kübra ve Mert ise 2/8'sini yemiştir. Babalarıda bir pasta getirmiştir. Elif 1/8'ni Mert 4/8'ü Kübra ise 3/8'ü yemiştir. Buna göre çocuklar toplam kaç pasta dilimi yemiştir.	6	6	6	6
V10	drive	1	6	Buna göre Hasan'ın sürdüğü miktar Ali'den ne kadar fazladır?	Buna göre Hasan'ın sürdüğü miktar Ali'den ne kadar fazladır?	6	6	6	6
V10	drive	2	4	Buna göre Mert'in sürdüğü öraba miktarının I katı ne kadardır?	Buna göre Mert'in sürdüğü araba miktarının 7 katı ne kadardır?	6	6	6	6
V10	drive	3	6	Buna göre Ali ve Mert'in toplam sürdüğü miktor, Hason'ın sürdüğü miktardan ne kadar azdır?	Buna göre Ali ve Mert'in toplam sürdüğü miktar, Hasan'ın sürdüğü miktardan ne kadar azdır?	6	6	6	6
V10	cake	1	4	Buna göre kekin en fazla yiyen kişinin yediği payının 5 katının paym10 fazlası kaçtın?	Buna göre kekin en fazla yiyen kişinin yediği payının 5 katının 10 fazlası kaçtır?	6	6	4	6
V10	cake	2	4	Buna göre Mert ve Elif'in yediği keklerin Gaupt- mının te bölümü kaçtır?	Buna göre Mert ve Elif'in yediği keklerin çarpımının 4'e bölümü kaçtır?	4	4	4	4
V10	cake	3	6	Buna göre Kübranın yediği kek, Elif'in yediği kekto ne kadar azdır?	Buna göre Kübra'nın yediği kek, Elif'in yediği kek'ten ne kadar azdır?	6	6	6	6
V11	drive	1	6	gidiş geliş toplam kaç km dir?	Gidiş geliş toplam kaç km dir?	6	6	5	6
V11	drive	2	6	Hasan kaç km araba sürmüştür.	Hasan kaç km araba sürmüştür.	6	6	6	6
V11	drive	3	6	Sürdükleri km Leri büyükten küçlüğe sıralayınız.	Sürdükleri km'leri büyükten küçüğe sıralayınız.	6	6	6	6
V11	cake	1	6	mert ve kübranır yediği parçaların toplamı kaçtır?	mert ve kübra'nın yediği parçaların toplamı kaçtır?	6	6	6	6
V11	cake	2	5	Elif, Mert ve Kübranın yediği keki 10 parçaya ayırırsala ne gibi değişiklikler olur?	Elif, Mert ve Kübranın yediği keki 10 parçaya ayırırsak ne gibi değişiklikler olur?	5	3	5	4
V11	cake	3	6	Buna göre Elif, mert ver Käibroinın yediği parçalari Büyükten küçüğe sıralayınız?	Buna göre Elif, mert ve Kübra'nın yediği parçalari Büyükten küçüğe sıralayınız.	6	6	6	6
V12	drive	1	6	Hasan kaç km araba sürmüştür?	Hasan kaç km araba sürmüştür?	6	6	6	6
V12	drive	2	6	Mert kaç km araba sürmüştür?	Mert kaç km araba sürmüştür?	6	6	6	6
V12	drive	3	6	3 arkadaşın toplam sürdüğü yol kaç km'dir?	3 arkadaşın toplam sürdüğü yol kaç km'dir?	6	6	6	6
V12	cake	1	6	Buna göre kekin tamamı bitmiş midir?	Buna göre kekin tamamı bitmiş midir?	6	6	6	6
V12	cake	2	4	Dolaptan bir pasta daha çıkarmışlardır ve Beş parçaya ayırmışlardır Elif o pastadan 3/8 dilim daha yemiştir buna göre Elif 2 pastanın toplamında kaç dilim pasta yemiştir?	Dolaptan bir pasta daha çıkarmışlardır ve 8 eş parçaya ayırmışlardır Elif o pastadan 3/8 dilim daha yemiştir buna göre Elif 2 pastanın toplamında kaç dilim pasta yemiştir?	4	4	6	6
V12	cake	3	6	Buna göre ilk pastadan üç arkaşaş kaş dilim paste yemisdir?.	Buna göre ilk pastadan üç arkaşaş kaç dilim pasta yemisdir?	6	6	6	6
V13	drive	1	6	Mert ve Hasan baç kman araba sürmüştür.	Mert ve Hasan kaç km araba sürmüştür.	6	6	6	6
V13	drive	2	6	Bu üç arkadaşın hepsi toplam kaç km Sürmüşlerdir.	Bu üç arkadaşın hepsi toplam kaç km sürmüşlerdir.	6	6	6	6
V13	drive	3	2	Mert ve Hasan toplam kaç km gitmişlerdin	Mert ve Hasan toplam kaç km gitmişlerdir.	6	6	6	6
V13	cake	1	6	Buna göre en fazla kek yiyeri. kimdir	Buna göre en fazla kek yiyen kimdir	6	6	6	6
V13	cake	2	6	Buna göre bu üç arkadaş toplam kaç kek dilimi yemiştir.	Buna göre bu üç arkadaş toplam kaç kek dilimi yemiştir.	6	6	6	6
V13	cake	3	6	Buna göre bir arkad daha katılsa kaç tane dilim yer yada dilim yiyebilirmi	Buna göre bir arkad daha katılsa kaç tane dilim yer yada dilim yiyebilirmi	6	6	6	6
V14	drive	1	6	Mert kaç km araba sürmüştür?	Mert kaç km araba sürmüştür?	6	6	6	6
V14	drive	2	5	Ali 70 km araba sürseydi Mert kaç km araba sürerdi?	Ali 70 km araba sürseydi Mert kaç km araba sürerdi?	6	6	6	6
V14	drive	3	6	Toplam kaç km araba sürmüşlerdir.	Toplam kaç km araba sürmüşlerdir.	6	6	6	6
V14	cake	1	5	Buna göre Yeşim de tek yemek isteseydi ve keki tekrar eşit parçalara ayırma hakkımız olsaydı ve Yeşim Elif'ten, Kübra ve Mert'ten fazla kek yemek isteseydi keki kaç eşit parçaya ayırmamız gerekirdi?	Buna göre Yeşim'de kek yemek isteseydi ve keki tekrar eşit parçalara ayırma hakkımız olsaydı ve Yeşim Elif'ten az, Kübra ve Mert'ten fazla kek yemek isteseydi keki kaç eşit parçaya ayırmamız gerekirdi?	5	5	5	6
V14	cake	2	6	Buna göre Elif bir kekin daha 1/6'sını yeseydi Elif toplam keklerin kaçta kaçını yemiş olurdu?	Buna göre Elif bir kekin daha 4/6'ünü yeseydi Elif toplam keklerin kaçta kaçını yemiş olurdu?	6	6	6	6
V14	cake	3	6	Buna göre Mert kekin 5/8'ini yeseydi, Elif ve Kübra eşit parça kek yeseydi Kübra kekin kaçta kaçını yerdi?	Buna göre Mert kekin 6/8'sını yeseydi, Elif ve Kübra eşit parça kek yeseydi Kübra kekin kaçta kaçını yerdi?	6	6	6	6
V15	drive	1	6	Mert, Hasan'dan 240 km az araba sürmüştür. Hasan, Ali'nin sürdüğü miktarın 9 katı kadar araba sürmüştür. Ali 80 km araba sürmüştür. Buna göre Hasan kaç km araba sürmüştür?	Mert, Hasan'dan 240 km az araba sürmüştür. Hasan, Ali'nin sürdüğü miktarın 9 katı kadar araba sürmüştür. Ali 80 km araba sürmüştür. Buna göre Hasan kaç km araba sürmüştür.	6	6	6	6
V15	drive	2	6	Gidiş ve dönüş kaç km'dir.	Gidiş ve dönüş kaç km'dir.	6	6	6	6
V15	drive	3	6	Ali ve Hasan toplam km sürmüştür.	Ali ve Hasan toplam km sürmüştür.	2	2	2	2
V15	cake	1	6	Bir kek 8 eşit parçaya ayrılmış. Elif kekin 2/8'ini, Melt 2/8'ini ve Kübra ise 2/8'ini yemiştir. Buna göre en fazla kim yemiştir?	Bir kek 8 eşit parçaya ayrılmış. Elif kekin 4/8'ini, Mert 2/8'ini ve Kübra ise 2/8'ini yemiştir. Buna göre en fazla kim yemiştir?	6	4	6	6
V15	cake	2	6	Buna göre en az kim yemiştir?	Buna göre en az kim yemiştir?	6	6	6	6
V15	cake	3	6	Kübra kaç dilim yerse kekin yarısını yemiş olur?	Kübra kaç dilim yerse kekin yarısını yemiş olur?	6	6	6	6
V2	drive	1	6	Problem 1:3 arkadaşın gittiği tatilin geri dönüş yolu kaç km'dir?.	3 arkadaşın gittiği tatilin geri dönüş yolu kaç km'dir?	6	6	6	6
V2	drive	2	6	Problem 2: Buna göre Mert ile Hasan toplanda kaç km arabd Sürmüştür?	Buna göre Mert ile Hasan toplamda kaç km araba sürmüştür?	6	6	6	6
V2	drive	3	6	Problem 3: 2 aman, Hasan, Aliden kaç km daha fazla araba Sürmüştür.	O zaman, Hasan, Ali'den kaç km daha fazla araba sürmüştür.	6	6	6	6
V2	cake	1	6	Buna göre hepsi ne kadar kek yer?	Buna göre hepsi ne kadar kek yer?	6	6	6	6
V2	cake	2	6	Bu verilere göre, Elif ve Mert kekin kaçda kaçını yemişdir?	Bu verilere göre, Elif ve Mert kekin kaçda kaçını yemişdir?	6	6	6	6
V2	cake	3	6	Bu arkadaşlardan hangisinin yediği miktar en fazladır?	Bu arkadaşlardan hangisinin yediği miktar en fazladır?	6	6	6	6
V3	drive	1	6	Buna göre Hasan ve Mert'in sürdüğü km sayısını bulunuz. (toplam degil)	Buna göre Hasan ve Mert'in sürdüğü km sayısını bulunuz. (toplam degil)	6	6	6	6
V3	drive	2	6	Buna göre yol kaç km'dir?	Buna göre yol kaç km'dir?	6	6	6	6
V3	drive	3	6	Buna göre Hasan ve Mert Aliden kaç km daha fazla sürmüştür?	Buna göre Hasan ve Mert Ali'den kaç km daha fazla sürmüştür?	6	6	6	6
V3	cake	1	6	Buna göre kektene kadar kalmıştır? (Kesirli bulunuz)"	Buna göre kekte ne kadar kalmıştır? (Kesirli bulunuz)"	6	6	6	6
V3	cake	2	6	Buna göre Elif, Mert ve Kübra toplamda ne kadar yemiştir?	Buna göre Elif, Mert ve Kübra toplamda ne kadar yemiştir?	6	6	6	6
V3	cake	3	6	Buna göre Elif ve Mert'in toplam yediği Kübraldan ne kadar fazladır?	Buna göre Elif ve Mert'in toplam yediği Kübra'dan ne kadar fazladır?	6	6	6	6
V4	drive	1	6	Buna göre Hasan kaç km araba sürmüştür.	Buna göre Hasan kaç km araba sürmüştür.	6	6	6	6
V4	drive	2	6	Buna göre hepsi kaç km araba sürmüştür.	Buna göre hepsi kaç km araba sürmüştür.	6	6	6	6
V4	drive	3	6	Buna göre en fazla kim araba sürmüştür.	Buna göre en fazla kim araba sürmüştür.	6	6	6	6
V4	cake	1	6	Buna göre kekin kaçka kaçını yemişler.	Buna göre kekin kaçta kaçını yemişler.	6	6	6	6
V4	cake	2	6	Bu kek 10 Parcaya bölünmüş olsaydı geriye kau dilim kek kalırdı..	Bu kek 10 Parcaya bölünmüş olsaydı geriye kaç dilim kek kalırdı.	5	5	5	5
V4	cake	3	6	Ali'de bu kekin 5/8 'ni yemek istiyor. buna göre kah dilim daha kek eklenmelidir.	Ali'de bu kekin 5/8 'ni yemek istiyor. buna göre kaç dilim daha kek eklenmelidir.	6	6	6	6
V5	drive	1	6	Bunlara göre toplam kaç KM gidilmiştir?	Bunlara göre toplam kaç km gidilmiştir?	6	6	6	6
V5	drive	2	6	Hasan'ın yolun toplamı Hasan gittiği km ile Mert' in gittiği kaç fozladır?	Hasan'ın gittiği km ile Mert'in gittiği yolun toplamı Hasan'dan kaç fazladır?	6	3	6	6
V5	drive	3	4	Ali ile Mert, Hasan'ın gittiği yolun yarısı- eşit olarak gitseydi, en fazla kullanan sayısın sıralayınız.	Ali ile Mert, Hasan'ın gittiği yolun yarısını eşit olarak gitseydi, en fazla kullanan sayısını sıralayınız.	6	6	6	6
V5	cake	1	4	Problem 1: Mert kekin yediği kadarının 4/3 'ü kaçtır?	Mert kekin yediği kadarının 4/5 'i kaçtır?	6	6	6	6
V5	cake	2	6	Problem 2: Elif ile Mert'in toplam yediği kek sayısı Kübra'dan kaç fazladır?	Problem 2: Elif ile Mert'in toplam yediği kek sayısı Kübra'dan kaç fazladır?	6	6	6	6
V5	cake	3	5	Problem 3: Bu keki Elif 'in yemediğini varsayorsak, yemediği kek sayısının kaçta kaçını Mert 'e ve Kübra'ya eklenir?	Bu keki Elif 'in yemediğini varsayarsak, yemediği kek sayısının kaçta kaçını Mert 'e ve Kübra'ya eklenir?	5	5	4	5
V6	drive	1	6	Problem 1: Buna göre yolun tamamı kesir cinsinden he Saplansaydı Hasan yolun kaçta kaçını gitmiş glurdu?	Buna göre yolun tamamı kesir cinsinden hesaplansaydı Hasan yolun kaçta kaçını gitmiş olurdu?	6	6	6	6
V6	drive	2	6	Problem 2: Buna göre Yolar tamam, eşit olarak dağıtılsaydı ve Mert kaç km ajuba sürerdi?	Buna göre Yolun tamamı eşit olarak dağıtılsaydı ve Mert kaç km araba sürerdi?	6	6	6	6
V6	drive	3	3	Problem 3: Mert Hasan dan daha az araba sürdü güne göre kaç kim daha eklerse bu ikisinin kat ettiği yol sayısı nasıl esitlenir?	Mert Hasan'dan daha az araba sürdüğüne göre kaç km daha eklerse bu ikisinin kat ettiği yol sayısı nasıl eşitlenir?	6	3	3	3
V6	cake	1	6	Buna göre Elif hiç kek yemeseydi, dilimlerini arkadaşlarına eşit şekilde dağıtsaydı Mert ve Kübra kaç dilim kek yerdi?	Buna göre Elif hiç kek yemeseydi, dilimlerini arkadaşlarına eşit şekilde dağıtsaydı Mert ve Kübra kaç dilim kek yerdi?	6	6	6	6
V6	cake	2	5	Buna göre Mert kekten 1 dilim daha yeseydi Elif ve Kübra kaç dilim kek yiye bilirdi	Buna göre Mert kekten 1 dilim daha yeseydi Elif ve Kübra kaç dilim kek yiyebilirdi?	4	5	4	4
V6	cake	3	6	Buna göre Kek 12 parçaya ayrılsaydı her biri kaş dilim kek alırdı?	Buna göre Kek 12 parçaya ayrılsaydı her biri kaç dilim kek alırdı?	6	6	6	6
V7	drive	1	3	Problem 1: Buna göre Hasan Mert'ten kaç km daha fazla Sürmüştür?	Buna göre Hasan Mert'ten kaç km daha fazla sürmüştür?	3	3	6	3
V7	drive	2	6	Problem 2: Buna göre Hasan ile Mertin sürdükleri km Sayısının farkı Ahmet'in kaa km sürdüğüne eşitse Ahmet kola km araba sürmüştür?	Buna göre Hasan ile Mertin sürdükleri km sayısının farkı Ahmet'in kaç km sürdüğüne eşitse Ahmet kaç km araba sürmüştür?	6	6	6	6
V7	drive	3	6	Problem 3: Buna göre Mert, Hasan ve Ali toplim kaç km gitmiştir?	Buna göre Mert, Hasan ve Ali toplam kaç km gitmiştir?	6	6	6	6
V7	cake	1	6	Buna göre en fazla dilimi yiyen kişi, kekin kaata kaçı ni yemiştir?	Buna göre en fazla dilimi yiyen kişi, kekin kaçta kaçını yemiştir?	6	6	6	6
V7	cake	2	6	Buna göre 3 arkadaşın yediği toplam kek dilimi kekin kaata temsil eder?	Buna göre 3 arkadaşın yediği toplam kek dilimi kekin kaçta kaçını temsil eder?	6	6	6	6
V7	cake	3	5	Buna göre bu üç arkadaş eşit dilimde kek yesaydi, geriye kaa dilim artardı?	Buna göre bu üç arkadaş eşit dilimde kek yeseydi, geriye kaç dilim artardı?	5	5	5	5
V8	drive	1	6	Buna göre hasan kay km araba sürmüştür. ?	Buna göre hasan kaç km araba sürmüştür. ?	6	6	6	6
V8	drive	2	6	Buna göre Mert kaa km a raba sürmüştür. ?,	Buna göre Mert kaç km araba sürmüştür. ?	6	6	6	6
V8	drive	3	6	Band çöre dönüşümlü olarak en fazla araba kim süümüş	Buna göre dönüşümlü olarak en fazla araba kim sümüştür?	6	6	6	6
V8	cake	1	3	Elifin doğum günündeş arkadaşı Mert ile kübray davet etmiştir. Elifin Doğum günü Pastasının 4/8 Kübra ile Mete ise 3/8 sini yemiştir buna göre pastanın tamamının 2/8 'sini kim yemiştir?	Elifin doğum gününde arkadaşı Mert ile kübrayı davet etmiştir. Elifin Doğum günü Pastasının 4/8 Kübra ile Mete ise 2/8 sini yemiştir buna göre Pastanın tamamının 2/4 'sini kim yemiştir?	4	4	6	6
V8	cake	2	3	Kullanardimment Nasar Ei Demon Kesirlerle işlemler inin Sınıfa bek getirmiştils Naşar hoca. Ecki 8 cesit pardaya bölmüştür. 5/8 inü Mert 1/8 sini Kübra ile Elif yemistir	Kübranın öğretmeni Yaşar E. Azman kesirlerle işlemler için sınıfa kek getirmiştir. Yaşar hoca keki 8 eşit parçaya bölmüştür. 4/8 nü Mert 2/8 sini Kübra ile Elif yemiştir. Buna göre Yaşar Hocanın getirdiği kekin Eşit kesirlerle yiyen öğrencinin isimleri nedir?	3	2	3	3
V8	cake	3	6	Mert gezerken postacıdan kek almıştır. Yanında Kübra ve Elifta vardı: Elif Pastanın 4/8 Kübra ilee Mert 3/8 sini yemiştir. Buna göre en fazla kek yiyen kimdir?	Mert gezerken pastacıdan kek almıştır. Yanında Kübra ve Elifte vardı: Elif Pastanın 4/8 Kübra ile Mert 2/8 sini yemiştir. Buna göre en fazla kek yiyen kimdir?	6	6	6	6
V9	drive	1	6	buna göre sücülen km sayısını eşit bölmed lçin herkesin kaç km sürmesi gereklidis	buna göre sürülen km sayısını eşit bölmek için herkesin kaç km sürmesi gereklidir	6	6	6	6
V9	drive	2	6	Menth baç bm sürmüştür?	Mert kaç km sürmüştür?	6	6	6	6
V9	drive	3	6	Sücüşe 4. kişi ellensegdi ve herkesin eşit sürmesi için kaç km sürmesi gerek?	Sürüşe 4. kişi eklenseydi ve herkesin eşit sürmesi için kaç km sürmesi gerek?	6	6	6	6
V9	cake	1	5	Herkezin keb dillmini eşitlemele için ket yopiliyor buna göre bet dilimlerinin eşitlenmesi. İçin kaç kat yopılması gereklidis	Herkezin kek dillmini eşitlemek için kek yapılyor buna göre kek dilimlerinin eşitlenmesi için kaç kek yapılması gereklidir	4	5	5	5
V9	cake	2	4	buna göre yenilen bet'in aritmetik ostdemosi kaçtır?	buna göre yenilen kek'in aritmetik ortalması kaçtır?	4	4	6	4
V9	cake	3	5	Herkesin yediği bet sayısı farklı soyda olsaydı kek sayışı kişiye göre baç dur yoz1012.	Herkesin yediği kek sayısı farklı sayıda olsaydı kek sayısı kişiye göre kaç olur yazınız.	3	4	5	5
X1	drive	1	6	Buna göre Hasan kaç km araba sürmüştür?	Buna göre Hasan kaç km araba sürmüştür	6	6	6	6
X1	drive	2	6	Mert'in kaç km araba sürdüğünü bulunuz.	Mert'in kaç km araba sürdüğünü bulunuz.	6	6	6	6
X1	drive	3	6	Buna göre Mert, Hasan ve Ali'nin toplam kaç km araba sürmüştür?	Buna göre Mert, Hasan ve Ali'nin toplam kaç km araba sürmüştür	6	6	6	6
X1	cake	1	2	Buna göre bütün çocuklar kekin k aça kaçını yediğini bulmak için paydaları eşitleyiniz	Buna göre bütün çocuklar kekin kaçta kaçını yediğini bulmak için paydaları eşitleyiniz	4	4	4	4
X1	cake	2	4	Gocukların yediği kek sıyısının Ondalık gösterjkni ni buluang	Çocukların yediği kek sıyısının Ondalık gösterimini bulunuz	6	6	6	6
X1	cake	3	4	Cocukların yediği kek şayışının yüzdelik seklinde bulunur	Çocukların yediği kek sayısının yüzdelik seklinde bulunuz	6	6	6	6
X10	drive	1	6	Mert ne kadar um sú rimasti	Mert ne kadar km sürmüştür	6	6	6	6
X10	drive	2	6	Kim daha az araba sürdü?	kim daha az araba sürmüştür	6	6	6	6
X10	drive	3	6	Hasan ne kadar konsa romaS, FUL	Hasan ne kadar km sürmüştür	6	6	6	6
X10	cake	1	6	Elif'in yediği kek sayısı kaçtır?	Elif'in yediği kek sayısı kaçtır	3	3	3	3
X10	cake	2	6	Ne kadar kek kalmıştır?	Ne kadar kek kalmıştır?	6	6	6	6
X10	cake	3	6	En az yiyen ile en çok yiyenin arasındaki fark nedir?	En az yiyen ile en çok yiyenin arasındaki fark ne	6	6	6	6
X11	drive	1	6	Ali, Hasan ve Mert toplam kaç km araba sürmüştür?	Ali, Hasan ve Mert toplam kaç km araba sürmüştür?	6	6	6	6
X11	drive	2	2	Bütün arkadaşların kaç km sürdüğünü bulunuz.	Bütün arkadaşların kaç km sürdüğünü bulunuz.	6	6	6	6
X11	drive	3	6	En fazla araba süren kimdir?	En fazla araba süren kimdir?	6	6	6	6
X11	cake	1	6	Arkadaşların yediği kekleri büyükten küçüğe sıralayınız.	Arkadaşların yediği kekleri büyükten küçüğe sıralayınız.	6	6	6	6
X11	cake	2	2	Arkadaşların yediği kekleri küçükten büyüğe sıralayınız.	Arkadaşların yediği kekleri küçükten büyüğe sıralayınız.	6	6	6	6
X11	cake	3	6	En fazla ve en az kek yiyenlerin arasındaki fark kaçtır?	En fazla ve en az kek yiyenlerin arasındaki fark kaçtır?	6	6	6	6
X12	drive	1	6	Buna göre Hasen kaç kilometre araba sürmüştür	Buna göre Hasen kaç kilometre araba sürmüştür	6	6	6	6
X12	drive	2	6	Buna göre buyolculuk Kaç Kilometre- dif	Buna göre bu yolculuk Kaç Kilometredir	6	6	6	6
X12	drive	3	6	yolculukte enfazla graba Süren Kişi kimdil	yolculukte en fazla araba süren Kişi kimdir	6	6	6	6
X12	cake	1	6	Buna göre en fazla kek yiyen öğrenci kimdir	Buna göre en fazla kek yiyen öğrenci kimdir	6	6	6	6
X12	cake	2	6	Buna göre en az kek yiyen öğrenci kimdir	Buna göre en az kek yiyen öğrenci kimdir	6	6	6	6
X12	cake	3	6	Buna göre Elif, mert ve kübranın yedikleri kek parçası kaçtır	Buna göre Elif, mert ve kübranın yedikleri kek parçası kaçtır	6	6	6	6
X13	drive	1	6	Mert arabayı kaç kilometre sürmüştür.	Mert arabayı kaç kilometre sürmüştür.	6	6	6	6
X13	drive	2	6	En fazla yol giden kişi kaç km yol gitmiştir	En fazla yol giden kişi kaç km yol gitmiştir	6	6	6	6
X13	drive	3	6	Yolun uzunluğu kaç km'dir	Yolun uzunluğu kaç km'dir	6	6	6	6
X13	cake	1	6	Buna göre Elif mert ve kübranın yediği dilimleri büyükten küçüğe sıralayınız	Buna göre Elif mert ve kübranın yediği dilimleri büyükten küçüğe sıralayınız	6	6	6	6
X13	cake	2	6	Elif kekin 4/8 nü yediğine göre kekin kaçta kaçını daha yerse kekin tamamını yer	Elif kekin 4/8 nü yediğine göre kekin kaçta kıçını daha yerse kekin tamamını yer	6	6	6	6
X13	cake	3	6	Mertin yediği parçanın kekin yüzde kaçı olduğunu bulunuz	Mertin yediği parçanın kekin yüzde kaçı olduğunu bulunuz	6	6	6	6
X2	drive	1	3	Mert, Hasan'dan Kaç km az araba Sürmüştür?	Mert, Hasan'dan Kaç Km az araba sürmüştür?	3	3	3	3
X2	drive	2	6	Hasan, Ali'nin sürdüğü miktardan Kaç km fazla araba Sürmüştür?	Hasan, Ali'nin sürdüğü miktardan Kaç Km fazla araba sürmüştür?	6	6	6	6
X2	drive	3	6	Mert, Ali ve Hasan toplam Kaç km araba Sürmüştür?	Mert, Ali ve Hasan toplam Kaç Km araba sürmüştür?	6	6	6	6
X2	cake	1	6	Buna göre mert hekin yüzde Thaçını yemiştir. ?	Buna göre mert Kekin yüzde Kaçını yemiştir. ?	6	6	6	6
X2	cake	2	6	Buna göre Elifimert'den kaç dilim fazla kelb Yemiştir?	Buna göre Elif, mert'den kaç dilim fazla kek Yemiştir?	6	6	6	6
X2	cake	3	3	Bu etkinlikte kimler eşit milktarda Kek yemiştir?	Bu etkinlikte kimler eşit milktarda Kek yemiştir?	3	3	3	3
X3	drive	1	6	Hasan kaç kilometre araç sürmüştür?	Hasan kaç kilometre araç sürmüştür	6	6	6	6
X3	drive	2	6	Hasan 720 kilometre gittiğine göre Mert kaç kilometre sürmüştür?	Hasan 720 kilometre gittiğine göre Mert kaç kilometre sürmüştür	6	6	6	6
X3	drive	3	6	Hasan, Ali ve Mert toplam kaç kilometre gitmiştir?	Hasan, Ali ve Mert toplam kaç kilometre gitmiştir	6	6	6	6
X3	cake	1	3	ELif, Mert ve kobránın yedikleri dilim Sayısını kesir olarak gösterin.	ELif, Mert ve kübra'nın yedikleri dilim sayısını kesir olarak gösterin.	3	3	3	3
X3	cake	2	6	Kobránın yediği dilim sayısını yüzde olarak yazınız.	Kübra'nın yediği dilim sayısını yüzde olarak yazınız.	6	6	6	6
X3	cake	3	6	Elif ve Mert'in toplam yediği dilim sayı sini tyüzde olarak gösterin	Elif ve Mert'in toplam yediği dilim sayısını yüzde olarak gösterin	6	6	6	6
X4	drive	1	6	Mert ve Ali'nin gittiği kilometre sayısını cm cinsinden söyleyiniz.	Mert ve Ali'nin gittiği kilometre sayısını cm cinsinden söyleyiniz.	6	6	6	6
X4	drive	2	6	Hasan Ali'den kaç km fazla araba sürmüştür?	Hasan Ali'den kaç km fazla araba sürmüştür?	6	6	6	6
X4	drive	3	2	Hasan Ali'den kaç km araba sürmüştür?	Hasan Ali'den kaç km araba sürmüştür?	6	6	6	6
X4	cake	1	6	Buna göre Mert Elif'den kaç fazla yemiştir?	Buna göre Mert Elif'den kaç fazla yemiştir.	4	4	4	4
X4	cake	2	6	Elif'in yediği kek sayısı Mert ve Kübra'nın yediği kek sayısına eşit midir? Eşitse nedenini veya çözümünü yazınız.	Elif'in yediği kek sayısı Mert ve Kübra'nın yediği kek sayısına eşit midir eşitse. Nedenini veya çözümünü yazınız.	6	6	6	6
X4	cake	3	6	Bu üç kişinin yediği kek sayısı Mert'den kaç fazladır?	Bu üç kişinin yediği kek sayısı Mert'den kaç fazladır?	6	6	6	6
X5	drive	1	6	Bu bilgilere göre Hasan kay kn sürmüştü?	Bu bilgilere göre Hasan kaç km sürmüştür?	6	6	6	6
X5	drive	2	6	Yukarıdaki bilgiye göre mert kaç lem süEMA tür?	Yukarıdaki bilgiye göre mert kaç km sürmüştür?	6	6	6	6
X5	drive	3	6	Buna göre en fazla süren kişi kimdir he Saplayınız?	Buna göre en fazla süren kişi kimdir hesaplayınız?	6	6	6	6
X5	cake	1	6	Problem 1: Buna göre en fazla kek yiyen kişi kimdir? Büyükten küçüğe doğlu sıralayın,	Buna göre en fazla kek yiyen kişi kimdir? Büyükten küçüğe doğlu sıralayın.	6	6	6	6
X5	cake	2	3	Problem 2: Eğer 2 kişi fazla. 1 kişi eksik olsaydı nasın olurdu? (dilimler istediğin gibi dağıtılabilir)	Eğer 2 kişi fazla 1 kişi eksik olsaydı nasıl olurdu? (dilimler istediğin gibi dağıtılabilir)	3	3	2	3
X5	cake	3	6	Problem 3: Elif ve Mert'in yediklerinin toplamı kübra'nın yedinin kaç fazladır.	Problem 3: Elif ve Mert'in yediklerinin toplamı kübra'nın yedinin kaç fazladır.	6	6	6	6
X6	drive	1	6	Problem 1: Ali 80 km araba sürmüş Hasan ise 720 km araba sürmüştür. Hasan ile Alinin sürdüğü km farkı koçtır.	Ali 80 km araba sürmüştür; Hasan ise 720 km araba sürmüştür. Hasan ile Alinin sürdüğü km farkı kaçtır.	6	6	6	6
X6	drive	2	6	Problem 2: Ali, Hasan ve Melt'in toplam araba kullandığı km sayısı kaçtı!	Ali, Hasan ve Mert'in toplam araba kullandığı km sayısı kaçtı!	6	6	6	6
X6	drive	3	6	Problem 3: Ali 80 km, Melt ise 480 km araba kullanmıştı Ali, Mert, ve Hasanın toplam kullandığı km sayısı 1280'dir buna göre Hasanın kullandığı miktarı kaçtır,	Ali 80 km, Mert ise 480 km araba kullanmıştır, Ali, Mert, ve Hasanın toplam kullandığı km sayısı 1280'dir buna göre Hasanın kullandığı miktarı kaçtır,	6	6	6	6
X6	cake	1	5	Problem 1: Bir kek 8 eşit parçaya ayrılmıştı. Mert kekin 2/8 sini, Elif ise kekin 4/8 unu yemiştir. Buna göre Kübra'nın yediği kek miktarı kaçtı?	Bir kek 8 eşit parçaya ayrılmıştır. Mert kekin 2/8 sini, Elif ise kekin 4/8'ünü yemiştir. Buna göre kübranın yediği kek miktarı kaçtır.	5	5	5	5
X6	cake	2	5	Problem 2: Bir kekin 4/8 ini elif, 2/8 sini Mert ve 2/8 sini kübra yemiştir bund göre kekin kaç eş parçaya ayıldığını bulunuz	Bir kekin 4/8'ünü elif, 2/8 sini Mert ve 2/8 sini kübra yemiştir buna göre yola çıkarsak kekin kaç eş parçaya ayıldığını bulunuz	3	3	3	3
X6	cake	3	2	Problem 3: Bir kekin 2/8 sini Mert 4/8 unu Bik sini Kübra yemiştir Bu kek kaa parçadır,	Bir kekin 2/8 sini Mert, 4/8' ünü Elif 2/8'sini kübra yemiştir Bu kek kaç parçadır.	3	3	3	3
X7	drive	1	6	Hasan kaç km araba sürmüştür?	Hasan kaç km araba sürmüştür?	6	6	6	6
X7	drive	2	6	Mert ve Hasan'ın km'lerinin toplamı kaçtır?	Mert ve Hasan'ın km'lerinin toplamı kaçtır?	6	6	6	6
X7	drive	3	6	Mert ve Ali'nin km'lerinin çıkırımı kaçtır?	Mert ve Ali'nin km'lerinin çıkarımı kaçtır?	6	6	6	6
X7	cake	1	6	Elif ve Mert'in yediği kekin miktarı kaçtır?	Elif ve Mert'in yediği kekin miktarı kaçtır?	6	6	6	6
X7	cake	2	6	Kübra ve Mert'in yediği kekin miktarı Elif'in yediği miktardan kaç fazladır?	Kübra ve Mert'in yediği kekin miktarı Elif'in yediği miktardan kaç fazladır?	6	6	6	6
X7	cake	3	4	Hepsinin yediği keklerin miktarının çıkarımı kaçtır?	Hepsinin yediği keklerin miktarının çıkarımı kaçtır?	4	4	4	4
X8	drive	1	6	Buna göre Hasan kaç kilometre araba sürmüştür?	Buna göre Hasan kaç kilometre araba sürmüştür?	6	6	6	6
X8	drive	2	6	Buna göre bu üç arkadaşın gittiği toplam mesafe kaç kilometredir?	Buna göre bu üç arkadaşın gittiği toplam mesafe kaç kilometredir?	6	6	6	6
X8	drive	3	6	Buna göre Mert'in yol aldığı mesafe Ali'nin aldığı mesafeden kaç km fazladır?	Buna göre Mert'in yol aldığı mesafe Ali'nin aldığı mesafeden kaç km fazladır?	6	6	6	6
X8	cake	1	6	Buna göre Elif, Mert ve Kübra üçünün toplam kaçını yemişlerdir?	Buna göre Elif, Mert ve Kübra kekin toplam kaçta kaçını yemişlerdir?	6	6	6	6
X8	cake	2	6	Bu üç arkadaşın yedikleri kek miktarlarını büyükten küçüğe sıralayınız?	Bu üç arkadaşın yedikleri kek miktarlarını büyükten küçüğe sıralayınız?	6	6	6	6
X8	cake	3	6	Buna göre en fazla parça yiyen ve en az yiyen kişilerin farkı kaçtır?	Buna göre kekten en fazla parça yiyen ve en az yiyen kişilerin farkı kaçtır?	6	6	6	6
X9	drive	1	6	Hasan kaç kilometre araba sürmüştür?	Hasan kaç kilometre araba sürmüştür	6	6	6	6
X9	drive	2	6	Mert kaç kilometre araba sürmüştür?	Mert kaç kilometre araba sürmüştür	6	6	6	6
X9	drive	3	6	Hepsinin kaç kilometre araba sürdüklerinin küçükten büyüğe sıralamasını oluşturunuz.	Hepsinin kaç kilometre araba sürdüklerinin küçükten büyüğe sıralamasını oluşturunuz.	6	6	6	6
X9	cake	1	6	Yukarıdaki 3 kişinin yediklerinin büyükten küçüğe sıralaması nasıl olur	Yukarıdaki 3 kişinin yediklerinin büyükten küçüğe sıralaması nasıl olur	6	6	6	6
X9	cake	2	6	Hepsinin yedikleri toplamları kaç olur	Hepsinin yedikleri miktarları kaç olur	6	6	6	6
X9	cake	3	6	Geriye ne kadar parça kalmıştır	Geriye ne kadar parça kalmıştır	6	6	6	6
Z1	drive	1	6	Nikonda yazılmış bilgilşe gör. Mert, Hasan'dan 24,0 km az az araba surmastir Hasan, Alinir Surduğu miktarn 19 katı kadar arabia Surmüştür Ali 80 km araba Sürmüştür. Buna göre Mert Ve Hasan kaç kilometre acaba sürmüşter	Yukarda yazılmış bilgilere göre Mert, Hasan'dan 240 km az araba sürmüştür. Hasan, Ali'nin Sürdüğü miktarın 9 katı kadar araba Sürmüştür Ali 80 km araba Sürmüştür. Buna göre Mert Ve Hasan kaç kilometre araba sürmüştür?	6	6	6	6
Z1	drive	2	6	Etkinlik 2'de yazılmış bilgilere göre Mert, Hasan'dan 240 Em km az praba sürmüştür. Ha Soni Ali'nig Surdog miktarın og katı kadar Armil araba Sürmüştür Ali 80 km araba Sürmspitar. Buna göre ikion daha fazla araba Sürmüştün	Etkinlik 2'de yazılmış bilgilere göre Mert, Hasan'dan 240 km az araba sürmüştür. Hasan, Ali'nin Sürdüğü miktarın 9 katı kadar araba Sürmüştür. Ali 80 km araba Sürmüştür. Buna göre kim daha fazla araba Sürmüştür?	6	6	6	6
Z1	drive	3	6	Etkinlik 2'de yazılmış bilgilere göre Mart, Hasan 'dan 249 km az 299 km az araba Surmüştür. Hasan. Alihom Sürduğü miktarın 9 katı kader, araba, Sürmiator. Ali 80 km araba Sürmüştür. Buna göre kim Im Jaha araba Sürmotorn	Etkinlik 2'de yazılmış bilgilere göre Mert, Hasan 'dan 240 km az araba sürmüştür. Hasan, Ali'nin sürdüğü miktarın 9 katı kadar araba sürmüştür. Ali 80 km araba Sürmüştür. Buna göre kim daha az araba Sürmüştür.	4	6	6	6
Z1	cake	1	6	Elif 8 eşit Parçaya ayrılan bir kekin 4/8'ini, Mert 2/8'ini ve Kübra ise 2/8'ini yemiştir. Buna göre Elif, Mert'ten ve Kübra'dan ne kadar fazla yemiştir?	Elif 8 eşit Parçaya ayrılan bir kekin 4/8'ini, Mert 2/8'ini ve Kübra ise 2/8'ini yemiştir. Buna göre Elif, Mert'ten ve Kübra'dan ne kadar fazla yemiştir?	6	6	6	6
Z1	cake	2	6	Bir kek 8 eşit Parçaya ayrılmıştır. Elif kekin 4/8'ini, Mert 2/8'ini ve Kübra ise 2/8'ini yemiştir. Buna göre Elif, Mert ve Kübra kalan kekin ne kadarını yemiştir?	Bir kek 8 eşit parçaya ayrılmıştır. Elif kekin 4/8'ini, Mert 2/8'ini ve Kübra ise 2/8'ini yemiştir. Buna göre Elif, Mert ve Kübra kekin ne kadarını yemiştir?	4	4	6	6
Z1	cake	3	6	Bir kek 8 eşit Parçaya ayrılmıştır. Elif kekin 4/8'ini, Mert 2/8'ini ve Kübra ise 2/8'ini yemiştir. Buna göre en az kim kek yemiştir?	Bir kek 8 eşit parçaya ayrılmıştır. Elif kekin 4/8'ini, Mert 2/8'ini ve Kübra ise 2/8'ini yemiştir. Buna göre en az kim kek yemiştir?	6	6	6	6
Z10	drive	1	4	Ali'nin sürdüğü km 9'la çarpıp 2'ye bölünüz.	Ali'nin sürdüğü km 9'la çarpıp 2'ye bölünüz.	4	6	4	6
Z10	drive	2	4	1. problemin sürdüğü sonucu 5'le çarpıp 4'e bölünüz.	1. problemin sürdüğü sonucu 5'le çarpıp 4'e bölünüz.	4	4	4	4
Z10	drive	3	4	2. problem sürdüğü sonucu 240'tan çıkarıp 8'le çarpınız.	2. problem sürdüğü sonucu 240'tan çıkarıp 5'le çarpınız.	5	4	4	4
Z10	cake	1	2	Bir kek daha gelip ve 1 arkadaş daha gelmiştir. 16 eşit parçaya ayrılmıştır. Ceren kekin 6/16'sını, Tuğba 6/16'sını Cemal ile 1/16'sını beraber yiyip Beren ise 1/16 yemiştir	Bir kek daha gelip ve 1 arkadaş daha gelmiştir. 16 eşit parçaya ayrılmıştır. Ceren kekin 6/16'sını, Tuğba 6/16'sını Cemal ile 1/16'sını beraber yiyip Beren ise 1/16 yemiştir	2	2	2	2
Z10	cake	2	4	Geriye kalan dilimleri ise Duru yemiştir. Geriye Kaç tane dilim kalmıştır?	Geriye kalan dilimleri ise Duru yemiştir. Geriye Kalan kaç tane dilim kalmıştır?	6	6	6	4
Z10	cake	3	4	Kalan dilimlerin yarısını Rasat yiyecektir. Bu yüzden kaç tane dilim kalmıştır?	Kalan dilimlerin yarısını Raşid yiyecektir. Bu yüzden kaç tane dilim kalmıştır.	4	4	4	4
Z2	drive	1	6	Hasan ve Mert kaç kim araba sürmüştür?	Hasan ve Mert kaç km araba sürmüştür?	6	6	6	6
Z2	drive	2	6	Ali kaç km daha araba sürseydi Mert kadar araba sürmüş olurdu?	Ali kaç km daha araba sürseydi Mert kadar araba sürmüş olurdu?	6	6	6	6
Z2	drive	3	3	Mert, Hasan kadar araba sürmek için kaç km daha araba sürmeliydi.	Mert, Hasan kadar araba sürmek için kaç km daha araba sürmeliydi.	6	3	6	3
Z2	cake	1	6	Buna göre 3 arkadaşın yedikleri keki büyükten küçüğe sıralayınız.	Buna göre 3 arkadaşın yedikleri keki büyükten küçüğe sıralayınız.	6	6	6	6
Z2	cake	2	3	Elif kekin kaçta kaçını yemiştir modelleyerek gösteririz.	Elif kekin kaçta kaçını yemiştir modelleyerek gösteriniz.	2	3	3	3
Z2	cake	3	6	Mert ve Kübra'nın yediği miktarı model üzerinde gösteriniz.	Mert ve Kübra'nın yediği miktarı model üzerinde gösteriniz.	6	6	6	6
Z3	drive	1	6	buna göre Mert kaç km araba sürmü	buna göre Mert kaç km araba sürmüş	6	6	6	6
Z3	drive	2	6	hepsi toplam kaç km yol yapmıştı	hepsi toplam kaç km yol yapmıştır	6	6	6	6
Z3	drive	3	6	Yolu 260 km daha uzattıklarına göre Ali Sürmüştür ve Mertle arasındakı Yaptıkları yol farkı nedir?	Yolu 260 km daha uzattıklarına göre Ali sürmüştür ve Mertle arasındaki Yaptıkları yol farkı nedir?	5	6	6	6
Z3	cake	1	6	buna göre ne kadar kek kalmıştır?	buna göre ne kadar kek kalmıştır?	6	6	6	6
Z3	cake	2	4	buna göre herkesin eşit kek yemesi için kaç kek kesilebilirdi?	buna göre herkezin eşit kek yemesi için kaç kek kesilebilirdi?	4	4	5	5
Z3	cake	3	6	Bu üç kekin iki tanesi 46 TL dir buna göre hepsinin toplam parası 200 TL oldugur göre aldıkları keklere kaa para ödenmiştir. Ve kaç paraları kalmıştır?	her kekin iki tanesi 46 TL dir buna göre hepsinin toplam parası 200 TL oldugun göre aldıkları keklere kaç para ödenmiştir. ve kaç paraları kalmıştır?	1	1	6	6
Z4	drive	1	4	Ali'nin sürdüğü kilometreyi 9'a çarpıp Hasan'ın sürdüğü miktarı bulduktan sonra 4'le çarpınız.	Ali'nin sürdüğü kilometreyi 9'a çarpıp Hasan'ın sürdüğü miktarı bulduktan sonra 4'le çarpınız.	4	4	4	4
Z4	drive	2	2	1. Problemde bulduğunuz sonucu 200 Kilometreden çıkartınız sonra 2'de çarpınız.	1. problemde bulduğunuz sonucu 240 kilometreden çıkartınız sonra 2'le çarpınız.	4	4	4	2
Z4	drive	3	2	2. Problemde bulduğunuz sonucu 8'la çarpınız ve 2'ye bölünüz.	2. problemde bulduğunuz sonucu 9'la çarpınız ve 2'ye bölünüz.	4	1	4	1
Z4	cake	1	6	Mert ve Kübra 'nın yediği kekksin toplamı kaatır?	Mert ve Kübra'nın yediği keklerin toplamı kaçtır?	6	6	6	6
Z4	cake	2	4	Elifve Mert'in yediği kekleri toplayıp sonia Kübra'nın şediği kekten arkartınız.	Elif ve Mert'in yediği kekleri toplayıp sonra Kübra'nın yediği kekten çıkartınız.	6	4	4	4
Z4	cake	3	6	Mert ve Kübra nın yediği bekleri toplayınız Topladıktan sonia Elif 'in kekinden alkarınız.	Mert ve Kübra'nın yediği kekleri toplayınız. Topladıktan sonra Elif 'in kekinden çıkartınız.	6	6	6	6
Z5	drive	1	0			0	0	0	0
Z5	drive	2	0			0	0	0	0
Z5	drive	3	0			0	0	0	0
Z5	cake	1	6	Elif ve Mert ne kadar yemiştir?	Elif ve Mert ne kadar yemiştir?	6	6	6	6
Z5	cake	2	6	8 parçaya ayrılmış bir kek en çok kim yemiş?	8 parçaya ayrılmış bir kek en çok kim yemiş?	6	6	6	6
Z5	cake	3	6	Hepsinin toplamı kaçtır?	Hepsinin toplamı kaçtır?	6	6	6	6
Z6	drive	1	4	Mert, hasandan kau fazla araba Sürmuştem	Mert, hasandan kaç fazla araba Sürmüştür?	4	4	4	4
Z6	drive	2	4	Ali, Mendes kan fazla orubu Sormister	Ali, Mertden kaç fazla araba sürmüştür.	4	4	4	4
Z6	drive	3	4	En az araba Süren, en çok araba süren'den bak fozladır?	En az araba süren, en çok araba süren'den kaç fazladır?	4	4	4	4
Z6	cake	1	6	Elif ve Mert ne kadar yemiştir?	Elif ve Mert ne kadar yemiştir?	6	6	6	6
Z6	cake	2	6	Elif ve Kübra ne kadar yemiştir?	Elif ve Kübra ne kadar yemiştir?	6	6	6	6
Z6	cake	3	6	Elif Kübradan kaç fazla Yemiştir?	Elif Kübradan kaç fazla yemiştir?	6	6	6	6
Z7	drive	1	6	Hasan kaç km araba sürmüştür	Hasan kaç km araba sürmüştür	6	6	6	6
Z7	drive	2	6	Mert kaç km araba sürmüştür	Mert kaç km araba sürmüştür	6	6	6	6
Z7	drive	3	6	Ali, Hasan ve Mert toplam kaç km yol gitmiştir	Ali, Hasan ve Mert toplam kaç km yol gitmiştir	6	6	6	6
Z7	cake	1	4	Problem 1: Merave Kübranın yediği keklerin oranını toplayıp Elifin yedigi kek oranı ile çıkarınız.	Mert ve Kübra'nın yediği keklerin oranını toplayıp Elif'in yedigi kek oranı ile çıkarınız.	6	6	6	6
Z7	cake	2	6	Problem 2: Buna göre kekin Kaçta Kaçı yenmiştir.	Buna göre kekin Kaçta Kaçı yenmiştir.	6	6	6	6
Z7	cake	3	3	Problem 3: Elif kekim ne kadarını yemiştir	Elif kekin ne kadarını yemiştir	3	3	3	3
Z8	drive	1	6	Buna göre Hasa ve Ali toplam kaç km. Araba Sürmüştür	Buna göre Hasan ve Ali toplam kaç km Araba Sürmüştür.	6	6	6	6
Z8	drive	2	6	Ali Hasanın gittiği kilometre kadar gitseydi kaç km gitmesi gerekirdi?	Ali Hasanın gittiği kilometre kadar gitseydi kaç km gitmesi gerekirdi?	6	6	6	6
Z8	drive	3	6	Buna göre hepsi kaç km gitmiştir.?	Buna göre hepsi kaç km gitmiştir.?	6	6	6	6
Z8	cake	1	6	Problem 1: Buna göre Elif ile Mertin yediği kek kektan kaç dilim kalmıştır,?	Buna göre Elif ile Mertin yediği kek kekten kaç dilim kalmıştır?	6	6	6	6
Z8	cake	2	6	Problem 2: Buna göre 16 dilim kek olsoi Etif 8 dilim yese Mert ve kübra kaç tane yese kek biter?	Buna göre 16 dilim kek olsa Elif 4/8 dilim yese Mert ve kübra kaç tane yese kek biter?	6	6	6	6
Z8	cake	3	3	Problem 3: Buna göre Elif yemeseydi Mert ve kübra onun yetmediğini yeseydi toplon kaç dilim düşer. Mert ve kübraya?	Buna göre Elif yemeseydi Mert ve kübra onun yemediğini yeseydi toplam kaç dilim düşer. Mert ve kübraya?	6	6	6	6
Z9	drive	1	6	Buna göre Hasan kaç km sürmüştür?	Buna göre Hasan kaç km sürmüştür?	6	6	6	6
Z9	drive	2	5	Ali, Hasan ve Mert birlikte haftasonu tatili için gittikleri gezide geri dönmektedir. Dönüşümlü olarak arabayı kullanarak yolculuğu tamamlamışlardır. Mert, Hasan'dan 240 km daha az araba sürmüştür. Hasan, Ali'nin sürdüğü miktarın 9 katı kadar araba sürmüştür. Buna göre toplam kaç km sürmüştür.	Ali, Hasan ve Mert birlikte haftasonu tatili için gittikleri gezide geri dönmektedir. Dönüşümlü olarak arabayı kullanarak yolculuğu tamamlamışlardır. Mert, Hasan'dan 240 km daha az araba sürmüştür. Hasan, Ali'nin sürdüğü miktarın 9 katı kadar araba sürmüştür. Buna göre toplam kaç km sürmüştür.	5	5	5	5
Z9	drive	3	0			0	0	0	0
Z9	cake	1	5	Merz kekin 2/4'ini Elif 4/8'ini Kübra - kaa dilim yemiştir?	Mert kekin 2/4'ini Elif 4/8'ini Kübra kaç dilim yemiştir?	6	6	5	5
Z9	cake	2	5	Elif kekin 7/8'ini yedi Mert. 5/18'ini yedi geri kalanın Kübra verdi Kübra ise 2/18'sini yedi kalanını ise babasına verdi. Buna göre babası kaç dilim yemiştir?	Elif kekin 8/18'ini yedi Mert 5/18'ini yedi geri kalanı Kübra verdi Kübra ise 2/18'sini yedi kalanını ise babasına verdi. Buna göre babası kaç dilim yemiştir?	4	4	6	6
Z9	cake	3	1	Kübra annesi Aysel Hanım 30 yaşında Kübra 2010 doğumludur. Buna göre Kübra kaç yaşındadır?	Kübra annesi Aysel Hanım 30 yaşında Kübra 2010 doğumludur. Buna göre Kübra kaç yaşındadır?	1	1	1	1
